# Supplementary material
Source: PubMed Central journal article supplement (PMC2668035)
Supplement: mmc1.pdf [file mmc1.pdf]

## Supplemental Data

## Identifying Genetic Traces of Historical Expansions:

## Phoenician Footprints in the Mediterranean

Pierre A. Zalloua, Daniel E. Platt, Mirvat El Sibai, Jade Khalife, Nadine Makhoul, Marc Haber, Yali Xue, Hassan Izaabel, Elena Bosch, Susan M. Adams, Eduardo Arroyo, Ana María López-Parra, Mercedes Aler, Antònia Picornell, Misericordia Ramon, Mark A. Jobling, David Comas, Jaume Bertranpetit, R. Spencer Wells, Chris Tyler-Smith, and The Genographic Consortium

Table S1. Haplogroups and Haplotypes of New Populations Sampled for this Study

| Population                                   | DNA Ref. No. | Haplogroup        | Allele Status at DYS |     |      |      |     |     |     |     |     |     |     |
|----------------------------------------------|--------------|-------------------|----------------------|-----|------|------|-----|-----|-----|-----|-----|-----|-----|
|                                              |              |                   | 19                   | 388 | 389I | 389b | 390 | 391 | 392 | 393 | 437 | 438 | 439 |
| <b>Populations from Phoenician Periphery</b> |              |                   |                      |     |      |      |     |     |     |     |     |     |     |
| Syr                                          | 18AH260      | E(xE1,E2,E3a,E3b) | 13                   | 12  | 12   | 18   | 24  | 10  | 11  | 13  | 14  | 10  | 12  |
| Syr                                          | 12AH309      | E1                | 16                   | 12  | 12   | 18   | 23  | 9   | 12  | 13  | 16  | 10  | 12  |
| Syr                                          | 4AH316       | E1                | 16                   | 12  | 12   | 17   | 22  | 10  | 11  | 14  | 17  | 10  | 13  |
| Syr                                          | 19AH260      | E3a               | 16                   | 12  | 13   | 18   | 21  | 10  | 12  | 13  | 14  | 12  | 12  |
| Syr                                          | 9AH260       | E3a               | 15                   | 14  | 13   | 18   | 23  | 10  | 11  | 12  | 14  | 11  | 12  |
| Syr                                          | 16AH316      | E3b1              | 13                   | 12  | 13   | 17   | 24  | 10  | 11  | 12  | 14  | 10  | 12  |
| Syr                                          | 17AH280      | E3b1              | 14                   | 12  | 13   | 17   | 23  | 10  | 11  | 13  | 14  | 10  | 11  |
| Syr                                          | 1AH309       | E3b1              | 13                   | 12  | 13   | 17   | 23  | 10  | 11  | 13  | 14  | 10  | 12  |
| Syr                                          | 9AH316       | E3b1              | 13                   | 12  | 14   | 17   | 24  | 10  | 11  | 13  | 14  | 10  | 12  |
| Syr                                          | 12AH329      | E3b1              | 13                   | 12  | 14   | 17   | 24  | 9   | 11  | 14  | 14  | 10  | 13  |
| Syr                                          | 2AH329       | E3b1              | 13                   | 12  | 13   | 15   | 24  | 11  | 11  | 13  | 14  | 10  | 13  |
| Syr                                          | 3AH329       | E3b1              | 14                   | 12  | 13   | 17   | 23  | 10  | 11  | 13  | 14  | 10  | 11  |
| Syr                                          | 5AH329       | E3b1              | 15                   | 12  | 14   | 17   | 24  | 10  | 11  | 13  | 14  | 10  | 11  |
| Syr                                          | 6AH329       | E3b1              | 14                   | 12  | 13   | 17   | 23  | 10  | 11  | 13  | 14  | 10  | 11  |
| Syr                                          | 18AH329      | E3b1              | 14                   | 12  | 13   | 17   | 24  | 10  | 11  | 13  | 14  | 10  | 12  |
| Syr                                          | 11AH252      | E3b1              | 13                   | 12  | 13   | 17   | 23  | 10  | 11  | 13  | 14  | 11  | 12  |
| Syr                                          | 3AH254       | E3b1              | 13                   | 12  | 13   | 17   | 21  | 10  | 11  | 13  | 14  | 11  | 12  |
| Syr                                          | 2AH309       | E3b2              | 13                   | 12  | 13   | 16   | 24  | 9   | 11  | 13  | 14  | 10  | 10  |
| Syr                                          | 3AH252       | E3b3              | 15                   | 12  | 13   | 18   | 23  | 10  | 11  | 14  | 14  | 11  | 12  |
| Syr                                          | 13AH316      | E3b3              | 15                   | 12  | 13   | 17   | 25  | 10  | 11  | 12  | 14  | 10  | 12  |
| Syr                                          | 7AH316       | E3b3              | 15                   | 12  | 13   | 17   | 23  | 10  | 11  | 14  | 14  | 11  | 12  |
| Syr                                          | 5AH260       | E3b3              | 13                   | 12  | 13   | 19   | 24  | 11  | 11  | 13  | 14  | 10  | 13  |

*AJHG*, Volume 83

| Population | DNA Ref. No. | Haplogroup | Allele Status at DYS |     |      |      |     |     |     |     |     |     |     |
|------------|--------------|------------|----------------------|-----|------|------|-----|-----|-----|-----|-----|-----|-----|
|            |              |            | 19                   | 388 | 389I | 389b | 390 | 391 | 392 | 393 | 437 | 438 | 439 |
| Syr        | 33AH252      | E3b3       | 15                   | 12  | 13   | 17   | 23  | 10  | 11  | 13  | 14  | 10  | 12  |
| Syr        | 37AH252      | E3b3       | 13                   | 12  | 13   | 17   | 22  | 10  | 11  | 13  | 15  | 10  | 12  |
| Syr        | 9AH252       | E3b3       | 13                   | 12  | 13   | 18   | 23  | 11  | 11  | 13  | 14  | 10  | 12  |
| Syr        | 8AH316       | E3b3       | 14                   | 12  | 14   | 18   | 24  | 10  | 11  | 13  | 14  | 8   | 13  |
| Syr        | 10AH326      | G          | 15                   | 12  | 14   | 18   | 22  | 9   | 11  | 14  | 16  | 10  | 12  |
| Syr        | 14AH316      | G          | 15                   | 12  | 12   | 17   | 21  | 10  | 11  | 14  | 16  | 10  | 12  |
| Syr        | 19AH316      | G          | 14                   | 16  | 13   | 15   | 23  | 10  | 11  | 12  | 14  | 10  | 11  |
| Syr        | 3AH316       | G          | 16                   | 12  | 12   | 16   | 22  | 10  | 5   | 14  | 16  | 10  | 11  |
| Syr        | 4AH309/15    | G          | 16                   | 12  | 13   | 18   | 22  | 10  | 11  | 14  | 16  | 10  | 11  |
| Syr        | 7AH309       | G          | 15                   | 12  | 13   | 16   | 23  | 10  | 11  | 13  | 16  | 10  | 11  |
| Syr        | 11AH329      | G          | 15                   | 13  | 13   | 16   | 22  | 10  | 11  | 13  | 16  | 11  | 11  |
| Syr        | 4AH326       | G          | 15                   | 12  | 12   | 18   | 22  | 10  | 11  | 14  | 16  | 10  | 11  |
| Syr        | 16AH329      | G          | 15                   | 13  | 13   | 16   | 22  | 10  | 11  | 13  | 15  | 11  | 12  |
| Syr        | 29AH252      | G          | 15                   | 12  | 11   | 15   | 22  | 10  | 11  | 14  | 16  | 10  | 11  |
| Syr        | 31AH252      | G          | 16                   | 12  | 12   | 18   | 23  | 10  | 11  | 12  | 16  | 10  | 11  |
| Syr        | 15AH326      | I          | 15                   | 12  | 13   | 16   | 22  | 10  | 11  | 14  | 14  | 10  | 13  |
| Syr        | 2AH252       | I          | 15                   | 13  | 13   | 15   | 22  | 10  | 12  | 13  | 14  | 10  | 11  |
| Syr        | 12AH280      | I          | 15                   | 12  | 13   | 16   | 23  | 10  | 11  | 13  | 14  | 10  | 11  |
| Syr        | 16AH280      | I          | 14                   | 13  | 13   | 17   | 23  | 11  | 11  | 13  | 14  | 11  | 12  |
| Syr        | 6AH309       | I          | 14                   | 12  | 13   | 15   | 22  | 10  | 12  | 13  | 15  | 11  | 13  |
| Syr        | 19AH329      | I          | 16                   | 13  | 13   | 17   | 23  | 12  | 11  | 14  | 14  | 10  | 12  |
| Syr        | 11AH326      | J1         | 13                   | 17  | 13   | 16   | 23  | 12  | 11  | 12  | 14  | 10  | 11  |
| Syr        | 15AH309      | J1         | 14                   | 16  | 13   | 18   | 24  | 10  | 11  | 12  | 14  | 10  | 11  |
| Syr        | 1AH252       | J1         | 14                   | 16  | 13   | 15   | 23  | 10  | 11  | 12  | 14  | 10  | 11  |
| Syr        | 10AH316      | J1         | 15                   | 17  | 13   | 17   | 23  | 11  | 11  | 12  | 14  | 10  | 11  |
| Syr        | 11AH316      | J1         | 14                   | 17  | 13   | 17   | 23  | 11  | 11  | 12  | 14  | 10  | 12  |
| Syr        | 14AH280      | J1         | 15                   | 18  | 13   | 16   | 23  | 11  | 11  | 12  | 14  | 10  | 11  |
| Syr        | 14AH309      | J1         | 14                   | 17  | 13   | 16   | 23  | 11  | 11  | 12  | 14  | 10  | 9   |
| Syr        | 15AH329      | J1         | 15                   | 16  | 13   | 18   | 23  | 11  | 11  | 12  | 14  | 10  | 11  |
| Syr        | 16AH309      | J1         | 14                   | 17  | 13   | 16   | 23  | 11  | 11  | 12  | 14  | 10  | 11  |
| Syr        | 18AH316      | J1         | 14                   | 15  | 13   | 17   | 24  | 10  | 11  | 13  | 14  | 10  | 11  |

*AJHG*, Volume 83

| Population | DNA Ref. No. | Haplogroup | Allele Status at DYS |     |      |      |     |     |     |     |     |     |     |
|------------|--------------|------------|----------------------|-----|------|------|-----|-----|-----|-----|-----|-----|-----|
|            |              |            | 19                   | 388 | 389I | 389b | 390 | 391 | 392 | 393 | 437 | 438 | 439 |
| Syr        | 20AH280      | J1         | 14                   | 16  | 13   | 17   | 23  | 10  | 11  | 12  | 14  | 10  | 11  |
| Syr        | 1AH316       | J          | 14                   | 16  | 13   | 16   | 23  | 10  | 11  | 12  | 15  | 9   | 12  |
| Syr        | 3AH309       | J1         | 14                   | 13  | 14   | 17   | 25  | 10  | 11  | 12  | 14  | 10  | 11  |
| Syr        | 6AH316       | J1         | 14                   | 16  | 13   | 17   | 23  | 10  | 11  | 12  | 14  | 10  | 11  |
| Syr        | 4AH329       | J1         | 14                   | 16  | 14   | 16   | 24  | 10  | 11  | 12  | 14  | 10  | 11  |
| Syr        | 7AH329       | J1         | 14                   | 17  | 13   | 17   | 23  | 12  | 11  | 12  | 14  | 10  | 11  |
| Syr        | 3AH326       | J1         | 14                   | 16  | 13   | 19   | 23  | 9   | 11  | 13  | 14  | 10  | 12  |
| Syr        | 10AH260      | J2         | 14                   | 16  | 13   | 16   | 22  | 10  | 11  | 12  | 14  | 9   | 11  |
| Syr        | 11AH260      | J1         | 14                   | 16  | 13   | 16   | 23  | 11  | 11  | 12  | 14  | 10  | 11  |
| Syr        | 17AH260      | J1         | 14                   | 17  | 14   | 17   | 23  | 11  | 11  | 12  | 14  | 10  | 11  |
| Syr        | 17AH329      | J1         | 14                   | 17  | 13   | 16   | 23  | 11  | 11  | 12  | 14  | 10  | 11  |
| Syr        | 21AH329      | J1         | 14                   | 12  | 13   | 17   | 23  | 12  | 11  | 12  | 14  | 10  | 11  |
| Syr        | 22AH329      | J1         | 14                   | 17  | 13   | 17   | 22  | 11  | 11  | 12  | 14  | 10  | 11  |
| Syr        | 8AH260       | J2         | 14                   | 16  | 14   | 17   | 22  | 10  | 11  | 12  | 15  | 9   | 11  |
| Syr        | 10AH252      | J1         | 15                   | 16  | 13   | 15   | 21  | 10  | 11  | 13  | 14  | 10  | 11  |
| Syr        | 12AH252      | J1         | 14                   | 17  | 13   | 17   | 21  | 11  | 11  | 13  | 14  | 10  | 11  |
| Syr        | 13AH252      | J1         | 14                   | 17  | 13   | 17   | 24  | 11  | 11  | 13  | 14  | 10  | 11  |
| Syr        | 16AH252      | J1         | 15                   | 17  | 14   | 17   | 23  | 10  | 11  | 12  | 14  | 10  | 12  |
| Syr        | 18AH252      | J1         | 14                   | 17  | 13   | 17   | 23  | 11  | 11  | 14  | 14  | 10  | 11  |
| Syr        | 19AH252      | J1         | 14                   | 13  | 13   | 18   | 24  | 10  | 11  | 13  | 14  | 10  | 12  |
| Syr        | 25AH252      | J1         | 14                   | 13  | 13   | 20   | 22  | 11  | 11  | 12  | 14  | 10  | 11  |
| Syr        | 12AH254      | J1         | 14                   | 17  | 13   | 17   | 23  | 11  | 11  | 12  | 14  | 10  | 11  |
| Syr        | 13AH254      | J1         | 14                   | 16  | 13   | 17   | 23  | 10  | 11  | 12  | 14  | 10  | 11  |
| Syr        | 15AH254      | J1         | 15                   | 15  | 13   | 17   | 24  | 11  | 11  | 13  | 14  | 10  | 11  |
| Syr        | 1AH254       | J1         | 14                   | 17  | 13   | 18   | 23  | 11  | 11  | 12  | 14  | 10  | 11  |
| Syr        | 2AH254       | J1         | 15                   | 16  | 13   | 17   | 23  | 11  | 11  | 14  | 14  | 10  | 11  |
| Syr        | 6AH254       | J          | 15                   | 12  | 12   | 14   | 23  | 10  | 12  | 13  | 16  | 10  | 11  |
| Syr        | 8AH254       | J1         | 14                   | 16  | 13   | 17   | 23  | 11  | 11  | 13  | 14  | 10  | 11  |
| Syr        | 36AH252      | J1         | 15                   | 17  | 13   | 17   | 23  | 11  | 11  | 12  | 14  | 10  | 11  |
| Syr        | 38AH252      | J1         | 14                   | 15  | 12   | 17   | 24  | 10  | 11  | 13  | 14  | 10  | 12  |
| Syr        | 16AH326      | J1         | 15                   | 17  | 13   | 17   | 23  | 11  | 11  | 12  | 14  | 10  | 12  |

*AJHG*, Volume 83

| Population | DNA Ref. No. | Haplogroup | Allele Status at DYS |     |      |      |     |     |     |     |     |     |     |
|------------|--------------|------------|----------------------|-----|------|------|-----|-----|-----|-----|-----|-----|-----|
|            |              |            | 19                   | 388 | 389I | 389b | 390 | 391 | 392 | 393 | 437 | 438 | 439 |
| Syr        | 19AH326      | J1         | 13                   | 17  | 13   | 16   | 22  | 11  | 11  | 12  | 14  | 11  | 11  |
| Syr        | 26AH252      | J2         | 15                   | 16  | 14   | 16   | 23  | 9   | 11  | 15  | 14  | 9   | 12  |
| Syr        | 28AH252      | J2         | 15                   | 16  | 13   | 16   | 23  | 9   | 11  | 15  | 14  | 9   | 12  |
| Syr        | 10AH280      | J2         | 15                   | 15  | 14   | 17   | 23  | 10  | 11  | 13  | 15  | 9   | 10  |
| Syr        | 13AH309      | J2         | 15                   | 15  | 14   | 17   | 23  | 10  | 11  | 13  | 15  | 9   | 11  |
| Syr        | 15AH280      | J2         | 15                   | 16  | 13   | 17   | 23  | 9   | 11  | 15  | 14  | 9   | 12  |
| Syr        | 18AH309      | J2         | 14                   | 15  | 14   | 17   | 23  | 10  | 11  | 12  | 14  | 9   | 12  |
| Syr        | 19AH280      | J2         | 14                   | 16  | 12   | 16   | 24  | 11  | 11  | 12  | 14  | 9   | 12  |
| Syr        | 1AH326       | J2         | 14                   | 15  | 13   | 15   | 24  | 10  | 11  | 12  | 15  | 9   | 11  |
| Syr        | 2AH316       | J2         | 15                   | 16  | 14   | 16   | 23  | 9   | 11  | 15  | 14  | 9   | 12  |
| Syr        | 7AH326       | J2         | 16                   | 16  | 13   | 16   | 23  | 9   | 11  | 12  | 14  | 9   | 12  |
| Syr        | 10AH329      | J2         | 15                   | 18  | 13   | 17   | 24  | 10  | 11  | 12  | 15  | 9   | 12  |
| Syr        | 1AH329       | J2         | 14                   | 15  | 14   | 17   | 23  | 10  | 11  | 12  | 15  | 9   | 12  |
| Syr        | 19AH254      | J2         | 15                   | 16  | 13   | 17   | 23  | 9   | 11  | 15  | 14  | 9   | 12  |
| Syr        | 20AH260      | J2         | 14                   | 17  | 14   | 18   | 23  | 10  | 11  | 12  | 15  | 9   | 12  |
| Syr        | 20AH329      | J2         | 15                   | 16  | 13   | 16   | 23  | 9   | 11  | 15  | 14  | 9   | 12  |
| Syr        | 23AH329      | J2         | 15                   | 15  | 13   | 17   | 23  | 11  | 11  | 12  | 16  | 9   | 12  |
| Syr        | 25AH329      | J2         | 14                   | 16  | 12   | 16   | 24  | 10  | 11  | 12  | 16  | 9   | 13  |
| Syr        | 2AH260       | J2         | 15                   | 16  | 13   | 16   | 23  | 9   | 11  | 15  | 14  | 9   | 12  |
| Syr        | 4AH260       | J2         | 14                   | 14  | 13   | 16   | 23  | 11  | 11  | 12  | 14  | 9   | 14  |
| Syr        | 14AH252      | J2         | 15                   | 16  | 14   | 16   | 23  | 9   | 11  | 14  | 14  | 9   | 12  |
| Syr        | 17AH252      | J2         | 15                   | 17  | 14   | 16   | 23  | 9   | 11  | 15  | 14  | 9   | 12  |
| Syr        | 20AH252      | J2         | 15                   | 15  | 13   | 16   | 23  | 10  | 11  | 12  | 16  | 9   | 12  |
| Syr        | 22AH252      | J2         | 15                   | 16  | 13   | 18   | 23  | 9   | 11  | 15  | 15  | 9   | 12  |
| Syr        | 13AH329      | J2         | 15                   | 17  | 13   | 17   | 23  | 10  | 11  | 12  | 15  | 9   | 11  |
| Syr        | 34AH252      | J2         | 14                   | 17  | 12   | 17   | 23  | 10  | 11  | 11  | 15  | 9   | 11  |
| Syr        | 17AH326      | J2         | 14                   | 15  | 14   | 17   | 23  | 10  | 11  | 12  | 14  | 9   | 12  |
| Syr        | 18AH326      | J2         | 14                   | 15  | 14   | 15   | 23  | 9   | 11  | 12  | 15  | 9   | 10  |
| Syr        | 20AH326      | J2         | 14                   | 15  | 14   | 17   | 23  | 10  | 11  | 12  | 14  | 9   | 12  |
| Syr        | 5AH252       | J2         | 14                   | 15  | 13   | 16   | 23  | 10  | 11  | 12  | 14  | 9   | 12  |
| Syr        | 6AH252       | J2         | 14                   | 17  | 12   | 16   | 23  | 11  | 11  | 12  | 15  | 9   | 12  |

AJHG, Volume 83

| Population | DNA Ref. No. | Haplogroup                | Allele Status at DYS |     |      |      |     |     |     |     |     |     |     |
|------------|--------------|---------------------------|----------------------|-----|------|------|-----|-----|-----|-----|-----|-----|-----|
|            |              |                           | 19                   | 388 | 389I | 389b | 390 | 391 | 392 | 393 | 437 | 438 | 439 |
| Syr        | 8AH252       | J2                        | 14                   | 14  | 14   | 17   | 24  | 10  | 11  | 12  | 15  | 9   | 13  |
| Syr        | 1AH316       | J2*(xJ2a,J2e,J2/-f,J2/-g) | 14                   | 15  | 11   | 17   | 23  | 10  | 11  | 12  | 14  | 9   | 12  |
| Syr        | 21AH252      | J2*(xJ2a,J2e,J2/-f,J2/-g) | 15                   | 16  | 12   | 17   | 24  | 10  | 11  | 12  | 14  | 9   | 13  |
| Syr        | 30AH252      | J2*(xJ2a,J2e,J2/-f,J2/-g) | 16                   | 15  | 12   | 16   | 24  | 11  | 11  | 12  | 14  | 9   | 11  |
| Syr        | 10S'94       | J2*(xJ2a,J2e,J2/-f,J2/-g) | 16                   | 15  | 12   | 16   | 24  | 11  | 11  | 12  | 16  | 9   | 12  |
| Syr        | 7AH280       | J2/-f1*(xJ2f1a)           | 14                   | 15  | 14   | 16   | 22  | 11  | 11  | 12  | 15  | 9   | 11  |
| Syr        | 9AH309       | J2/-f1*(xJ2f1a)           | 14                   | 15  | 14   | 16   | 22  | 11  | 11  | 12  | 15  | 9   | 11  |
| Syr        | 8AH329       | J2/-f1*(xJ2f1a)           | 14                   | 15  | 13   | 16   | 23  | 10  | 11  | 12  | 15  | 9   | 12  |
| Syr        | 9AH254       | J2/-f1*(xJ2f1a)           | 14                   | 16  | 13   | 16   | 22  | 10  | 11  | 12  | 15  | 9   | 12  |
| Syr        | 1S'59        | J2/-f1*(xJ2f1a)           | 14                   | 15  | 13   | 16   | 23  | 10  | 11  | 12  | 15  | 9   | 10  |
| Syr        | 16AH260      | K*(xK2,K3,L,M,NO,P)       | 15                   | 12  | 13   | 16   | 23  | 10  | 14  | 13  | 14  | 10  | 11  |
| Syr        | 12AH260      | K2                        | 14                   | 12  | 13   | 16   | 23  | 10  | 13  | 13  | 14  | 9   | 11  |
| Syr        | 24AH329      | K2                        | 14                   | 12  | 14   | 16   | 23  | 10  | 13  | 13  | 14  | 9   | 11  |
| Syr        | 4AH254       | K2                        | 15                   | 12  | 14   | 17   | 23  | 11  | 13  | 13  | 14  | 9   | 11  |
| Syr        | 13AH280      | L1                        | 14                   | 12  | 13   | 16   | 22  | 10  | 14  | 11  | 15  | 10  | 13  |
| Syr        | 5AH316       | L1                        | 14                   | 13  | 14   | 16   | 22  | 10  | 14  | 11  | 15  | 10  | 12  |
| Syr        | 6AH326       | L1                        | 14                   | 12  | 12   | 16   | 22  | 10  | 14  | 11  | 15  | 10  | 13  |
| Syr        | 5AH326       | L1                        | 14                   | 12  | 12   | 16   | 22  | 10  | 14  | 11  | 15  | 10  | 13  |
| Syr        | 26AH329      | L1                        | 14                   | 12  | 12   | 16   | 22  | 10  | 14  | 11  | 15  | 10  | 13  |
| Syr        | 6AH260       | L1                        | 14                   | 12  | 12   | 16   | 22  | 10  | 15  | 11  | 15  | 10  | 13  |
| Syr        | 15/24AH252   | L1                        | 14                   | 12  | 12   | 16   | 22  | 10  | 14  | 11  | 15  | 10  | 13  |
| Syr        | 7AH254       | L1                        | 15                   | 12  | 14   | 18   | 23  | 10  | 14  | 13  | 14  | 9   | 12  |
| Syr        | 1AH260       | N or O                    | 14                   | 12  | 13   | 16   | 23  | 10  | 14  | 13  | 14  | 10  | 10  |
| Syr        | 12AH316      | P                         | 13                   | 12  | 14   | 16   | 22  | 10  | 14  | 13  | 14  | 11  | 12  |
| Syr        | 18AH254      | P                         | 14                   | 12  | 13   | 16   | 22  | 11  | 16  | 13  | 14  | 11  | 12  |
| Syr        | 11AH280      | R1/-b1a                   | 15                   | 12  | 14   | 16   | 25  | 10  | 13  | 13  | 14  | 13  | 12  |
| Syr        | 11AH309      | R1/-b1c                   | 14                   | 12  | 13   | 16   | 24  | 11  | 13  | 12  | 15  | 12  | 12  |
| Syr        | 9AH280       | R1/-b1c                   | 14                   | 12  | 13   | 16   | 25  | 11  | 13  | 12  | 15  | 11  | 13  |
| Syr        | 13AH260      | R1/-b1c                   | 14                   | 12  | 12   | 15   | 23  | 10  | 14  | 12  | 15  | 12  | 12  |



AJHG, Volume 83

| Population | DNA Ref. No. | Haplogroup          | Allele Status at DYS |     |      |      |     |     |     |     |     |     |     |
|------------|--------------|---------------------|----------------------|-----|------|------|-----|-----|-----|-----|-----|-----|-----|
|            |              |                     | 19                   | 388 | 389I | 389b | 390 | 391 | 392 | 393 | 437 | 438 | 439 |
| Syr        | 14R7         | J1                  | -                    | -   | -    | -    | -   | -   | -   | -   | -   | -   | -   |
| Syr        | 15AJ57       | J1                  | -                    | -   | -    | -    | -   | -   | -   | -   | -   | -   | -   |
| Syr        | 22AJ163      | J1                  | -                    | -   | -    | -    | -   | -   | -   | -   | -   | -   | -   |
| Syr        | 10R172       | J1                  | -                    | -   | -    | -    | -   | -   | -   | -   | -   | -   | -   |
| Syr        | 4AL15        | J1                  | -                    | -   | -    | -    | -   | -   | -   | -   | -   | -   | -   |
| Syr        | 6AJ152       | J2                  | -                    | -   | -    | -    | -   | -   | -   | -   | -   | -   | -   |
| Syr        | 6R104        | J2                  | -                    | -   | -    | -    | -   | -   | -   | -   | -   | -   | -   |
| Syr        | 16AJ57       | J2                  | -                    | -   | -    | -    | -   | -   | -   | -   | -   | -   | -   |
| Syr        | 12AJ184      | J2                  | -                    | -   | -    | -    | -   | -   | -   | -   | -   | -   | -   |
| Syr        | 10AJ57       | J2                  | -                    | -   | -    | -    | -   | -   | -   | -   | -   | -   | -   |
| Syr        | 19AJ57       | J2                  | -                    | -   | -    | -    | -   | -   | -   | -   | -   | -   | -   |
| Syr        | 8AJ152       | J2                  | -                    | -   | -    | -    | -   | -   | -   | -   | -   | -   | -   |
| Syr        | 18AJ163      | J2/-f1*(xJ2f1a)     | -                    | -   | -    | -    | -   | -   | -   | -   | -   | -   | -   |
| Syr        | 6AJ163       | J2/-f1*(xJ2f1a)     | -                    | -   | -    | -    | -   | -   | -   | -   | -   | -   | -   |
| Syr        | 15R59        | J2e                 | -                    | -   | -    | -    | -   | -   | -   | -   | -   | -   | -   |
| Syr        | 5BA2         | JxJ1                | -                    | -   | -    | -    | -   | -   | -   | -   | -   | -   | -   |
| Syr        | 4AJ163       | K*(xK2,K3,L,M,NO,P) | -                    | -   | -    | -    | -   | -   | -   | -   | -   | -   | -   |
| Syr        | 5AJ163       | K*(xK2,K3,L,M,NO,P) | -                    | -   | -    | -    | -   | -   | -   | -   | -   | -   | -   |
| Syr        | 3AJ163       | K2                  | -                    | -   | -    | -    | -   | -   | -   | -   | -   | -   | -   |
| Syr        | 14AJ184      | L                   | -                    | -   | -    | -    | -   | -   | -   | -   | -   | -   | -   |
| Syr        | 11AJ152      | L                   | -                    | -   | -    | -    | -   | -   | -   | -   | -   | -   | -   |
| Syr        | 6AJ177       | R1/-b*              | -                    | -   | -    | -    | -   | -   | -   | -   | -   | -   | -   |
| Syr        | 5R35         | R1/-b1c             | -                    | -   | -    | -    | -   | -   | -   | -   | -   | -   | -   |
| Syr        | 17AJ57       | R1/-b1c             | -                    | -   | -    | -    | -   | -   | -   | -   | -   | -   | -   |
| Syr        | 6R59         | R1a1                | -                    | -   | -    | -    | -   | -   | -   | -   | -   | -   | -   |
| Syr        | 15R7         | R1a1                | -                    | -   | -    | -    | -   | -   | -   | -   | -   | -   | -   |
| Syr        | 13R7         | R1a1                | -                    | -   | -    | -    | -   | -   | -   | -   | -   | -   | -   |
| Pal        | 7AL117       | E3b1                | 13                   | -   | 13   | 17   | 24  | 10  | 11  | 13  | 14  | 10  | 12  |
| Pal        | 8AL117       | E3b1                | 15                   | -   | 13   | 17   | 23  | 10  | 11  | 13  | 14  | 10  | 13  |
| Pal        | 4AL121       | E3b1                | 13                   | -   | 13   | 17   | 23  | 10  | 11  | 13  | 14  | 11  | 11  |

*AJHG*, Volume 83

| Population | DNA Ref. No. | Haplogroup | Allele Status at DYS |     |      |      |     |     |     |     |     |     |     |
|------------|--------------|------------|----------------------|-----|------|------|-----|-----|-----|-----|-----|-----|-----|
|            |              |            | 19                   | 388 | 389I | 389b | 390 | 391 | 392 | 393 | 437 | 438 | 439 |
| Pal        | 12AL119      | E3b1       | 13                   | –   | 13   | 17   | 23  | 10  | 11  | 13  | 14  | 11  | 11  |
| Pal        | 4AL119       | E3b1       | 13                   | –   | 13   | 17   | 23  | 10  | 11  | 13  | 14  | 11  | 11  |
| Pal        | 12AL170      | E3b1       | 15                   | –   | 13   | 17   | 24  | 11  | 11  | 12  | 14  | 11  | 11  |
| Pal        | 5AL171       | E3b1       | 15                   | –   | 13   | 17   | 23  | 10  | 11  | 13  | 14  | 10  | 12  |
| Pal        | 8AL177       | E3b1       | 14                   | –   | 13   | 17   | 24  | 10  | 11  | 13  | 14  | 10  | 12  |
| Pal        | 35AL181      | E3b1       | 13                   | –   | 12   | 18   | 25  | 10  | 11  | 14  | 14  | 10  | 12  |
| Pal        | 41AL181      | E3b1       | 15                   | –   | 13   | 17   | 23  | 10  | 11  | 13  | 14  | 10  | 12  |
| Pal        | 43AL181      | E3b1       | 13                   | –   | 13   | 16   | 23  | 10  | 11  | 13  | 15  | 10  | 12  |
| Pal        | 47AL181      | E3b1       | 15                   | –   | 13   | 17   | 23  | 10  | 11  | 13  | 14  | 10  | 12  |
| Pal        | 3AL120       | E3b3       | 14                   | –   | 12   | 17   | 23  | 11  | 11  | 12  | 14  | 10  | 11  |
| Pal        | 8AL120       | E3b3       | 14                   | –   | 13   | 17   | 25  | 10  | 11  | 14  | 14  | 10  | 11  |
| Pal        | 15AL120      | E3b3       | 14                   | –   | 13   | 17   | 25  | 10  | 11  | 14  | 14  | 10  | 11  |
| Pal        | 3AL170       | E3b3       | 14                   | –   | 12   | 18   | 24  | 10  | 11  | 13  | 14  | 10  | 12  |
| Pal        | 14AL171      | E3b3       | 13                   | –   | 13   | 17   | 23  | 10  | 11  | 13  | 14  | 10  | 11  |
| Pal        | 14AL172      | E3b3       | 14                   | –   | 14   | 17   | 24  | 10  | 11  | 13  | 14  | 10  | 12  |
| Pal        | 10AL120      | J2         | 14                   | –   | 13   | 15   | 23  | 10  | 11  | 12  | 15  | 9   | 11  |
| Pal        | 15AL171      |            | 13                   | –   | 13   | 18   | 24  | 10  | 11  | 13  | 14  | 10  | 12  |
| Pal        | 17AL171      |            | 15                   | –   | 13   | 18   | 23  | 11  | 11  | 12  | 14  | 10  | 12  |
| Pal        | 20AL171      |            | 16                   | –   | 14   | 16   | 23  | 10  | 11  | 14  | 14  | 10  | 11  |
| Pal        | 33AL181      |            | 14                   | –   | 14   | 17   | 23  | 10  | 11  | 13  | 14  | 10  | 13  |
| Pal        | 49AL181      |            | 13                   | –   | 14   | 16   | 23  | 11  | 13  | 13  | 15  | 9   | 12  |
| Pal        | 15AL117      | J1         | 14                   | 16  | 13   | 16   | 23  | 10  | 11  | 12  | 15  | 9   | 12  |
| Pal        | 10AL170      | J1         | 14                   | –   | 13   | 18   | 23  | 10  | 11  | 12  | 14  | 10  | 11  |
| Pal        | 31AL181      | J1         | 14                   | –   | 13   | 16   | 23  | 11  | 11  | 12  | 14  | 10  | 11  |
| Pal        | 13AL117      | J1         | 14                   | –   | 13   | 16   | 22  | 11  | 11  | 12  | 14  | 10  | 11  |
| Pal        | 14AL117      | J1         | 14                   | –   | 13   | 17   | 23  | 10  | 11  | 13  | 14  | 10  | 11  |
| Pal        | 11AL120      | J1         | 14                   | –   | 13   | 17   | 23  | 10  | 11  | 13  | 14  | 10  | 11  |
| Pal        | 13AL120      | J1         | 15                   | –   | 13   | 16   | 23  | 10  | 11  | 13  | 14  | 10  | 11  |
| Pal        | 13AL121      | J1         | 14                   | –   | 13   | 16   | 22  | 11  | 11  | 12  | 14  | 10  | 11  |
| Pal        | 15AL121      | J1         | 13                   | –   | 13   | 19   | 24  | 10  | 11  | 13  | 14  | 11  | 11  |
| Pal        | 2AL119       | J1         | 14                   | –   | 13   | 16   | 22  | 11  | 11  | 12  | 14  | 10  | 11  |



*AJHG*, Volume 83

| Population | DNA Ref. No. | Haplogroup      | Allele Status at DYS |     |      |      |     |     |     |     |     |     |     |
|------------|--------------|-----------------|----------------------|-----|------|------|-----|-----|-----|-----|-----|-----|-----|
|            |              |                 | 19                   | 388 | 389I | 389b | 390 | 391 | 392 | 393 | 437 | 438 | 439 |
| Pal        | 6AL170       | J1              | 14                   | _   | 13   | 16   | 22  | 10  | 11  | 12  | 14  | 10  | 11  |
| Pal        | 7AL170       | J1              | 14                   | _   | 13   | 19   | 23  | 10  | 11  | 13  | 14  | 10  | 11  |
| Pal        | 9AL170       | J1              | 14                   | _   | 13   | 15   | 23  | 10  | 11  | 12  | 14  | 10  | 11  |
| Pal        | 4AL171       | J1              | 14                   | _   | 13   | 17   | 23  | 10  | 11  | 13  | 14  | 10  | 11  |
| Pal        | 11AL171      | J1              | 15                   | _   | 13   | 16   | 23  | 10  | 11  | 13  | 14  | 10  | 11  |
| Pal        | 16AL171      | J1              | 14                   | _   | 13   | 17   | 23  | 11  | 11  | 12  | 14  | 10  | 11  |
| Pal        | 18AL171      | J1              | 14                   | _   | 13   | 15   | 23  | 10  | 11  | 12  | 14  | 10  | 11  |
| Pal        | 1AL172       | J1              | 14                   | _   | 13   | 17   | 23  | 11  | 11  | 12  | 14  | 10  | 11  |
| Pal        | 2AL172       | J1              | 14                   | _   | 13   | 17   | 23  | 10  | 11  | 13  | 14  | 10  | 11  |
| Pal        | 4AL172       | J1              | 14                   | _   | 13   | 15   | 23  | 10  | 11  | 12  | 14  | 10  | 11  |
| Pal        | 10AL172      | J1              | 14                   | _   | 13   | 17   | 23  | 10  | 11  | 12  | 14  | 10  | 11  |
| Pal        | 11AL172      | J1              | 14                   | _   | 13   | 17   | 24  | 9   | 11  | 12  | 14  | 10  | 12  |
| Pal        | 12AL172      | J1              | 14                   | _   | 13   | 15   | 23  | 10  | 11  | 12  | 14  | 10  | 11  |
| Pal        | 15AL172      | J1              | 15                   | _   | 13   | 16   | 23  | 10  | 9   | 13  | 14  | 10  | 11  |
| Pal        | 16AL172      | J1              | 14                   | _   | 13   | 18   | 23  | 10  | 11  | 12  | 14  | 10  | 11  |
| Pal        | 17AL172      | J1              | 14                   | _   | 13   | 17   | 21  | 10  | 11  | 12  | 14  | 10  | 11  |
| Pal        | 20AL172      | J1              | 14                   | _   | 13   | 16   | 23  | 10  | 11  | 12  | 14  | 10  | 11  |
| Pal        | 21AL172      | J1              | 14                   | _   | 13   | 18   | 23  | 10  | 11  | 13  | 14  | 10  | 11  |
| Pal        | 22AL172      | J1              | 14                   | _   | 13   | 17   | 24  | 9   | 11  | 12  | 14  | 10  | 12  |
| Pal        | 5AL177       | J1              | 14                   | _   | 13   | 15   | 23  | 10  | 11  | 12  | 14  | 10  | 11  |
| Pal        | 11AL180      | J1              | 14                   | _   | 13   | 16   | 23  | 11  | 11  | 12  | 14  | 10  | 11  |
| Pal        | 30AL180      | J1              | 14                   | _   | 13   | 17   | 23  | 12  | 11  | 12  | 14  | 10  | 11  |
| Pal        | 6AL181       | J1              | 14                   | _   | 13   | 17   | 23  | 11  | 11  | 12  | 14  | 10  | 11  |
| Pal        | 50AL181      | J1              | 14                   | _   | 13   | 17   | 23  | 11  | 11  | 12  | 14  | 10  | 11  |
| Pal        | 16AL117      | J2/-f1*(xJ2f1a) | 14                   | _   | 13   | 16   | 22  | 11  | 11  | 12  | 14  | 10  | 11  |
| Pal        | 5AL120       | J2/-f1*(xJ2f1a) | 14                   | 14  | 13   | 18   | 22  | 10  | 11  | 12  | 15  | 9   | 11  |
| Pal        | 7AL120       | J2/-f1*(xJ2f1a) | 14                   | 15  | 13   | 16   | 23  | 10  | 11  | 12  | 14  | 9   | 11  |
| Pal        | 12AL121      | J2/-f1*(xJ2f1a) | 15                   | 15  | 13   | 16   | 23  | 9   | 11  | 13  | 14  | 9   | 13  |
| Pal        | 2AL171       | J2/-f1*(xJ2f1a) | 14                   | 15  | 13   | 16   | 23  | 10  | 11  | 12  | 15  | 9   | 12  |
| Pal        | 19AL171      | J2/-f1*(xJ2f1a) | 16                   | 15  | 13   | 16   | 23  | 10  | 11  | 12  | 16  | 9   | 12  |
| Pal        | 6AL172       | J2/-f1*(xJ2f1a) | 14                   | 15  | 13   | 19   | 22  | 11  | 9   | 13  | 14  | 9   | 13  |

*AJHG*, Volume 83

| Population | DNA Ref. No. | Haplogroup      | Allele Status at DYS |     |      |      |     |     |     |     |     |     |     |
|------------|--------------|-----------------|----------------------|-----|------|------|-----|-----|-----|-----|-----|-----|-----|
|            |              |                 | 19                   | 388 | 389I | 389b | 390 | 391 | 392 | 393 | 437 | 438 | 439 |
| Pal        | 18AL172      | J2/-f1*(xJ2f1a) | 14                   | 15  | 13   | 16   | 22  | 11  | 11  | 12  | 15  | 9   | 11  |
| Pal        | 6AL177       | J2/-f1*(xJ2f1a) | 14                   | 16  | 13   | 18   | 22  | 10  | 11  | 12  | 15  | 9   | 11  |
| Pal        | 3AL121       | J2a             | 14                   | 15  | 13   | 18   | 23  | 11  | 11  | 12  | 15  | 9   | 13  |
| Pal        | 3AL119       | J2a             | 14                   | 15  | 13   | 15   | 23  | 10  | 11  | 12  | 15  | 9   | 11  |
| Pal        | 6AL119       | J2a             | 14                   | 16  | 13   | 18   | 22  | 10  | 11  | 12  | 15  | 9   | 11  |
| Pal        | 8AL170       | J2a             | 14                   | 15  | 13   | 16   | 23  | 10  | 11  | 12  | 14  | 9   | 11  |
| Pal        | 3AL172       | J2a             | 15                   | 15  | 13   | 17   | 23  | 10  | 12  | 12  | 14  | 10  | 11  |
| Pal        | 8AL121       | J2e*(xJ2e1)     | 14                   | 15  | 13   | 16   | 23  | 10  | 11  | 12  | 15  | 9   | 11  |
| Pal        | 4AL170       |                 | 16                   | –   | 14   | 16   | 23  | 10  | 11  | 14  | 14  | 10  | 11  |
| Pal        | 12AL180      |                 | 15                   | –   | 14   | 18   | 21  | 10  | 11  | 13  | 16  | 10  | 12  |
| Pal        | 3AL177       |                 | 14                   | –   | 13   | 19   | 25  | 9   | 11  | 13  | 14  | 10  | 12  |
| Pal        | 5AL170       |                 | 15                   | –   | 12   | 17   | 22  | 10  | 11  | 15  | 16  | 9   | 10  |
| Pal        | 11AL181      |                 | 15                   | –   | 13   | 17   | 23  | 10  | 11  | 13  | 14  | 10  | 12  |
| Pal        | 6AL117       |                 | 13                   | –   | 13   | 16   | 24  | 9   | 11  | 13  | 14  | 10  | 10  |
| Pal        | 10AL117      |                 | 15                   | –   | 13   | 17   | 21  | 10  | 11  | 14  | 15  | 11  | 12  |
| Pal        | 9AL121       |                 | 13                   | –   | 14   | 16   | 24  | 9   | 11  | 13  | 14  | 10  | 10  |
| Pal        | 1AL170       |                 | 13                   | –   | 13   | 17   | 23  | 10  | 11  | 13  | 14  | 11  | 11  |
| Pal        | 4AL177       |                 | 13                   | –   | 14   | 17   | 24  | 9   | 11  | 13  | 14  | 10  | 11  |
| Pal        | 9AL177       |                 | 14                   | –   | 11   | 17   | 23  | 10  | 11  | 14  | 14  | 10  | 12  |
| Pal        | 9AL117       |                 | 13                   | –   | 14   | 18   | 25  | 11  | 11  | 12  | 14  | 9   | 13  |
| Pal        | 19AL117      |                 | 14                   | –   | 13   | 16   | 23  | 11  | 11  | 12  | 14  | 10  | 11  |
| Pal        | 6AL120       |                 | 15                   | –   | 13   | 16   | 23  | 10  | 11  | 13  | 14  | 10  | 11  |
| Pal        | 8AL119       |                 | 15                   | –   | 14   | 17   | 25  | 10  | 11  | 14  | 14  | 10  | 11  |
| Pal        | 7AL171       |                 | 15                   | –   | 12   | 15   | 24  | 10  | 14  | 13  | 14  | 9   | 11  |
| Pal        | 32AL181      |                 | 15                   | –   | 13   | 17   | 23  | 10  | 13  | 11  | 17  | 10  | 11  |
| Pal        | 3AL171       |                 | 14                   | –   | 13   | 17   | 24  | 10  | 12  | 12  | 15  | 12  | 12  |
| Pal        | 7AL172       |                 | 15                   | –   | 13   | 17   | 21  | 9   | 11  | 14  | 16  | 10  | 11  |
| Pal        | 5AL121       |                 | 14                   | –   | 13   | 16   | 24  | 11  | 13  | 12  | 15  | 12  | 12  |
| Pal        | 5AL181       |                 | 14                   | –   | 13   | 17   | 24  | 10  | 12  | 12  | 15  | 12  | 12  |
| Pal        | 38AL181      |                 | 14                   | –   | 13   | 16   | 24  | 10  | 13  | 12  | 15  | 12  | 14  |

**Populations from Non-Phoenician Levant**

*AJHG*, Volume 83

| Population | DNA Ref. No. | Haplogroup | Allele Status at DYS |     |      |      |     |     |     |     |     |     |     |
|------------|--------------|------------|----------------------|-----|------|------|-----|-----|-----|-----|-----|-----|-----|
|            |              |            | 19                   | 388 | 389I | 389b | 390 | 391 | 392 | 393 | 437 | 438 | 439 |
| Pal        | 1AL181       | L*         | 14                   | –   | 13   | 16   | 23  | 10  | 14  | 12  | 16  | 11  | 11  |
| Pal        | 12AL33       | L*         | 15                   | –   | 14   | 16   | 23  | 10  | 15  | 12  | 16  | 10  | 12  |
| Pal        | 23AL25       | E          | 13                   | –   | 13   | 16   | 24  | 10  | 11  | 13  | 14  | 10  | 12  |
| Pal        | 11AL33       | E          | 13                   | –   | 13   | 16   | 24  | 11  | 11  | 13  | 15  | 10  | 13  |
| Pal        | 5AL30        | E3a        | 14                   | 12  | 13   | 17   | 21  | 10  | 11  | 13  | 14  | 11  | 11  |
| Pal        | 3AL180       | E3b1       | 13                   | –   | 13   | 17   | 23  | 10  | 11  | 13  | 14  | 10  | 11  |
| Pal        | 6AL180       | E3b1       | 12                   | 12  | 13   | 18   | 25  | 10  | 11  | 14  | 14  | 10  | 12  |
| Pal        | 24AL180      | E3b1       | 11                   | 12  | 12   | 17   | 23  | 10  | 11  | 13  | 14  | 10  | 12  |
| Pal        | 35AL180      | E3b1       | 15                   | –   | 13   | 17   | 23  | 10  | 11  | 13  | 14  | 10  | 12  |
| Pal        | 37AL180      | E3b1       | 15                   | –   | 13   | 17   | 23  | 10  | 11  | 13  | 14  | 10  | 12  |
| Pal        | 39AL180      | E3b1       | 13                   | –   | 13   | 17   | 24  | 11  | 11  | 13  | 14  | 10  | 11  |
| Pal        | 4S50/4AF145  | E3b1       | 13                   | –   | 13   | 17   | 24  | 11  | 11  | 13  | 14  | 10  | 11  |
| Pal        | 31AL180      | E3b1       | 13                   | –   | 13   | 17   | 24  | 11  | 11  | 13  | 14  | 10  | 11  |
| Pal        | 44AL181      | E3b1       | 13                   | –   | 13   | 17   | 24  | 11  | 11  | 13  | 14  | 10  | 11  |
| Pal        | 14AJ178      | E3b1       | 15                   | –   | 13   | 17   | 23  | 10  | 11  | 13  | 14  | 10  | 12  |
| Pal        | 1AL12        | E3b1       | 15                   | –   | 13   | 17   | 23  | 10  | 11  | 13  | 14  | 10  | 12  |
| Pal        | 4AL117       | E3b1       | 14                   | –   | 11   | 17   | 23  | 10  | 11  | 14  | 14  | 10  | 12  |
| Pal        | 14AL120      | E3b1       | 13                   | –   | 14   | 17   | 23  | 10  | 12  | 13  | 14  | 10  | 12  |
| Pal        | 7AL119       | E3b1       | 15                   | –   | 13   | 17   | 23  | 10  | 11  | 13  | 14  | 10  | 12  |
| Pal        | 29AL181      | E3b1       | 13                   | –   | 13   | 17   | 24  | 11  | 11  | 13  | 14  | 10  | 11  |
| Pal        | 9D145        | E3b1       | 13                   | –   | 13   | 17   | 24  | 11  | 11  | 13  | 14  | 10  | 11  |
| Pal        | 12D157       | E3b1       | 13                   | –   | 13   | 17   | 24  | 11  | 11  | 14  | 14  | 11  | 12  |
| Pal        | 5AL23        | E3b1       | 13                   | –   | 13   | 17   | 24  | 11  | 11  | 13  | 14  | 11  | 11  |
| Pal        | 6AL25        | E3b1       | 13                   | –   | 13   | 17   | 25  | 11  | 11  | 14  | 14  | 11  | 12  |
| Pal        | 17AL23       | E3b1       | 13                   | –   | 12   | 17   | 24  | 10  | 10  | 13  | 14  | 10  | 10  |
| Pal        | 17AL30       | E3b1       | 13                   | –   | 13   | 17   | 25  | 11  | 11  | 14  | 14  | 11  | 12  |
| Pal        | 21AL30       | E3b1       | 13                   | –   | 14   | 16   | 24  | 9   | 11  | 13  | 14  | 10  | 10  |
| Pal        | 5AL31        | E3b1       | 14                   | –   | 13   | 17   | 23  | 10  | 11  | 13  | 14  | 10  | 11  |
| Pal        | 47AL23       | E3b1       | 13                   | –   | 13   | 18   | 23  | 10  | 11  | 13  | 14  | 10  | 12  |
| Pal        | 24AL24       | E3b1       | 15                   | –   | 13   | 17   | 25  | 10  | 12  | 13  | 14  | 10  | 11  |
| Pal        | 14AL30       | E3b1       | 14                   | –   | 12   | 17   | 24  | 10  | 11  | 13  | 14  | 10  | 10  |

*AJHG*, Volume 83

| Population | DNA Ref. No. | Haplogroup | Allele Status at DYS |     |      |      |     |     |     |     |     |     |     |
|------------|--------------|------------|----------------------|-----|------|------|-----|-----|-----|-----|-----|-----|-----|
|            |              |            | 19                   | 388 | 389I | 389b | 390 | 391 | 392 | 393 | 437 | 438 | 439 |
| Pal        | 14AL29       | E3b1       | 13                   | _   | 13   | 17   | 23  | 10  | 11  | 13  | 14  | 10  | 11  |
| Pal        | 15AL25       | E3b1       | 13                   | _   | 14   | 17   | 26  | 10  | 11  | 13  | 14  | 10  | 11  |
| Pal        | 20AL30       | E3b1       | 14                   | _   | 14   | 17   | 24  | 10  | 11  | 13  | 14  | 10  | 13  |
| Pal        | 23AL30       | E3b1       | 15                   | _   | 13   | 17   | 23  | 10  | 11  | 13  | 14  | 10  | 12  |
| Pal        | 13AL32       | E3b1       | 11                   | _   | 13   | 17   | 25  | 10  | 12  | 13  | 14  | 11  | 11  |
| Pal        | 25AL33       | E3b1       | 14                   | _   | 13   | 17   | 24  | 10  | 11  | 13  | 14  | 10  | 11  |
| Pal        | 5AL33        | E3b3       | 11                   | 12  | 13   | 18   | 24  | 10  | 11  | 13  | 14  | 10  | 12  |
| Pal        | 18AL117      | E3b3       | 11                   | 12  | 13   | 18   | 24  | 10  | 11  | 13  | 14  | 10  | 12  |
| Pal        | 20AL117      | E3b3       | 11                   | 12  | 13   | 18   | 24  | 10  | 11  | 13  | 14  | 10  | 12  |
| Pal        | 14AL121      | E3b3       | 11                   | 12  | 13   | 19   | 25  | 10  | 11  | 13  | 14  | 9   | 12  |
| Pal        | 8AL172       | E3b3       | 15                   | _   | 13   | 17   | 24  | 10  | 11  | 13  | 14  | 10  | 12  |
| Pal        | 18AL180      | E3b3       | 14                   | _   | 13   | 17   | 22  | 10  | 11  | 12  | 14  | 10  | 11  |
| Pal        | 22AL180      | E3b3       | 13                   | _   | 13   | 18   | 24  | 10  | 11  | 13  | 14  | 10  | 11  |
| Pal        | 27AL180      | E3b3       | 14                   | _   | 13   | 16   | 23  | 11  | 11  | 12  | 14  | 10  | 11  |
| Pal        | 18AL181      | E3b3       | 13                   | _   | 12   | 18   | 25  | 10  | 11  | 14  | 14  | 10  | 12  |
| Pal        | 19AL181      | E3b3       | 15                   | _   | 13   | 17   | 22  | 10  | 11  | 14  | 16  | 10  | 13  |
| Pal        | 20AL181      | E3b3       | 13                   | _   | 13   | 18   | 25  | 10  | 11  | 14  | 14  | 10  | 11  |
| Pal        | 25AL181      | E3b3       | 15                   | _   | 12   | 17   | 22  | 11  | 11  | 13  | 16  | 10  | 11  |
| Pal        | 26AL181      | E3b3       | 14                   | _   | 13   | 17   | 23  | 10  | 11  | 13  | 14  | 10  | 11  |
| Pal        | 39AL181      | E3b3       | 13                   | _   | 12   | 17   | 23  | 9   | 11  | 14  | 14  | 10  | 12  |
| Pal        | 1D157        | E3b3       | 13                   | _   | 12   | 20   | 24  | 10  | 11  | 12  | 14  | 10  | 12  |
| Pal        | 2D157        | E3b3       | 13                   | _   | 13   | 18   | 23  | 10  | 11  | 13  | 14  | 10  | 13  |
| Pal        | 10D157       | E3b3       | 14                   | _   | 13   | 16   | 24  | 11  | 13  | 12  | 15  | 12  | 14  |
| Pal        | 3R26         | E3b3       | 14                   | _   | 13   | 17   | 24  | 10  | 11  | 13  | 14  | 10  | 13  |
| Pal        | 15AL24       | E3b3       | 13                   | _   | 13   | 17   | 25  | 10  | 11  | 13  | 14  | 10  | 11  |
| Pal        | 3AL30        | E3b3       | 14                   | _   | 13   | 17   | 24  | 10  | 11  | 13  | 14  | 10  | 11  |
| Pal        | 15AL26       | E3b3       | 14                   | _   | 13   | 17   | 24  | 10  | 11  | 13  | 14  | 10  | 13  |
| Pal        | 18AL29       | G          | 13                   | 13  | 12   | 17   | 21  | 10  | 11  | 14  | 15  | 9   | 11  |
| Pal        | 38AL23       | G          | 13                   | 13  | 12   | 17   | 21  | 10  | 11  | 14  | 15  | 10  | 11  |
| Pal        | 22AL27       | G          | 13                   | 13  | 12   | 17   | 21  | 10  | 11  | 14  | 15  | 10  | 11  |
| Pal        | 45AL24       | G          | 13                   | 12  | 12   | 17   | 22  | 10  | 11  | 14  | 16  | 10  | 12  |

*AJHG*, Volume 83

| Population | DNA Ref. No. | Haplogroup | Allele Status at DYS |     |      |      |     |     |     |     |     |     |     |
|------------|--------------|------------|----------------------|-----|------|------|-----|-----|-----|-----|-----|-----|-----|
|            |              |            | 19                   | 388 | 389I | 389b | 390 | 391 | 392 | 393 | 437 | 438 | 439 |
| Pal        | 7AL33        | G          | 13                   | 12  | 13   | 16   | 22  | 11  | 11  | 13  | 16  | 10  | 12  |
| Pal        | 15AL30       | G          | 14                   | 12  | 12   | 16   | 22  | 10  | 11  | 14  | 16  | 10  | 11  |
| Pal        | 7AL27        | G          | 13                   | 12  | 14   | 17   | 21  | 11  | 11  | 14  | 16  | 10  | 11  |
| Pal        | 16AL29       | G          | 12                   | 12  | 13   | 16   | 22  | 10  | 12  | 14  | 16  | 10  | 12  |
| Pal        | 1AL117       | G          | 15                   | _   | 13   | 16   | 22  | 10  | 11  | 13  | 16  | 10  | 13  |
| Pal        | 13AL172      | G          | 14                   | _   | 13   | 16   | 23  | 11  | 11  | 12  | 14  | 10  | 11  |
| Pal        | 28AL180      | G          | 16                   | _   | 13   | 17   | 22  | 10  | 11  | 14  | 16  | 10  | 13  |
| Pal        | 3AL181       | G          | 15                   | _   | 13   | 17   | 22  | 10  | 11  | 14  | 16  | 10  | 13  |
| Pal        | 36AL181      | G          | 15                   | _   | 13   | 17   | 22  | 10  | 11  | 14  | 16  | 10  | 13  |
| Pal        | 2D145        | G          | 11                   | _   | 13   | 18   | 24  | 10  | 11  | 13  | 14  | 10  | 11  |
| Pal        | 4D157        | G          | 13                   | _   | 14   | 17   | 27  | 10  | 11  | 13  | 14  | 10  | 11  |
| Pal        | 7D157        | G          | 15                   | _   | 13   | 16   | 24  | 10  | 11  | 14  | 15  | 10  | 11  |
| Pal        | 5D157        | G          | 16                   | _   | 12   | 17   | 22  | 10  | 11  | 14  | 16  | 10  | 10  |
| Pal        | 8D157        | G          | 15                   | _   | 13   | 16   | 24  | 10  | 11  | 14  | 15  | 10  | 11  |
| Pal        | 13D157       | I          | 15                   | _   | 13   | 17   | 23  | 10  | 11  | 13  | 14  | 10  | 12  |
| Pal        | 14D157       | I          | 15                   | _   | 13   | 17   | 22  | 10  | 10  | 14  | 16  | 10  | 11  |
| Pal        | 8X152        | I          | 14                   | _   | 13   | 16   | 24  | 10  | 12  | 13  | 16  | 10  | 12  |
| Pal        | 9AJ178       | I          | 15                   | _   | 14   | 16   | 22  | 10  | 11  | 12  | 14  | 9   | 11  |
| Pal        | 21AJ152      | I          | 14                   | _   | 13   | 17   | 23  | 11  | 11  | 12  | 14  | 10  | 11  |
| Pal        | 15AJ163      | I          | 13                   | _   | 14   | 16   | 22  | 10  | 11  | 13  | 14  | 10  | 12  |
| Pal        | 4AL23        | I          | 13                   | _   | 13   | 19   | 25  | 10  | 11  | 13  | 14  | 10  | 12  |
| Pal        | 31AL24       | I          | 13                   | _   | 12   | 19   | 24  | 10  | 11  | 12  | 14  | 10  | 12  |
| Pal        | 2AL30        | I          | 14                   | _   | 13   | 16   | 23  | 10  | 10  | 13  | 14  | 10  | 11  |
| Pal        | 6AL23        |            | 14                   | _   | 14   | 16   | 23  | 10  | 11  | 12  | 15  | 9   | 10  |
| Pal        | 7AL23        | G          | 16                   | _   | 13   | 16   | 23  | 10  | 11  | 12  | 16  | 9   | 12  |
| Pal        | 22AL31       | I          | 13                   | _   | 13   | 17   | 24  | 10  | 11  | 13  | 14  | 10  | 11  |
| Pal        | 22AL23       | I          | 15                   | _   | 13   | 16   | 23  | 10  | 11  | 12  | 15  | 9   | 12  |
| Pal        | 26AL23       | G          | 14                   | _   | 13   | 18   | 22  | 10  | 11  | 12  | 15  | 9   | 11  |
| Pal        | 41AL23       | G          | 13                   | _   | 13   | 19   | 24  | 10  | 11  | 13  | 14  | 11  | 11  |
| Pal        | 32AL26       | G          | 14                   | _   | 13   | 18   | 22  | 10  | 11  | 12  | 15  | 9   | 11  |
| Pal        | 33AL26       | G          | 14                   | _   | 14   | 18   | 24  | 10  | 11  | 13  | 14  | 10  | 10  |

*AJHG*, Volume 83

| Population | DNA Ref. No. | Haplogroup | Allele Status at DYS |     |      |      |     |     |     |     |     |     |     |
|------------|--------------|------------|----------------------|-----|------|------|-----|-----|-----|-----|-----|-----|-----|
|            |              |            | 19                   | 388 | 389I | 389b | 390 | 391 | 392 | 393 | 437 | 438 | 439 |
| Pal        | 15AL31       | I          | 12                   | 17  | 13   | 16   | 24  | 10  | 11  | 12  | 14  | 10  | 11  |
| Pal        | 25AL26       | G          | 12                   | 15  | 13   | 17   | 23  | 11  | 11  | 12  | 14  | 10  | 12  |
| Pal        | 23AL33       | G          | 13                   | 15  | 13   | 17   | 22  | 10  | 11  | 12  | 14  | 10  | 13  |
| Pal        | 13AL31       | I          | 13                   | 16  | 13   | 17   | 23  | 10  | 11  | 12  | 14  | 10  | 12  |
| Pal        | 6AL33        | J1         | 12                   | 17  | 13   | 17   | 23  | 10  | 11  | 12  | 14  | 10  | 11  |
| Pal        | 44AL26       | J1         | 12                   | 17  | 13   | 17   | 23  | 11  | 11  | 12  | 14  | 10  | 11  |
| Pal        | 21AL31       | J1         | 14                   | _   | 13   | 18   | 23  | 10  | 11  | 13  | 14  | 10  | 11  |
| Pal        | 9AL120       | J1         | 14                   | _   | 13   | 16   | 23  | 11  | 11  | 12  | 14  | 10  | 11  |
| Pal        | 12AL120      | J1         | 14                   | _   | 13   | 17   | 23  | 10  | 11  | 12  | 15  | 10  | 11  |
| Pal        | 2AL121       | J1         | 14                   | _   | 13   | 17   | 23  | 10  | 11  | 12  | 15  | 10  | 11  |
| Pal        | 5AL180       | J1         | 14                   | _   | 13   | 17   | 23  | 11  | 11  | 12  | 14  | 10  | 11  |
| Pal        | 10AL180      | J1         | 14                   | _   | 13   | 17   | 23  | 11  | 12  | 12  | 14  | 10  | 12  |
| Pal        | 13AL180      | J1         | 14                   | _   | 13   | 16   | 22  | 10  | 11  | 12  | 14  | 10  | 11  |
| Pal        | 26AL180      | J1         | 15                   | _   | 13   | 16   | 22  | 12  | 11  | 12  | 14  | 10  | 12  |
| Pal        | 29AL180      | J1         | 14                   | _   | 13   | 16   | 23  | 11  | 11  | 12  | 14  | 10  | 11  |
| Pal        | 32AL180      | J1         | 14                   | _   | 13   | 16   | 23  | 11  | 11  | 12  | 14  | 10  | 11  |
| Pal        | 33AL180      | J1         | 14                   | _   | 13   | 17   | 22  | 10  | 11  | 12  | 14  | 10  | 11  |
| Pal        | 16AJ55       | J1         | 14                   | _   | 13   | 16   | 23  | 11  | 11  | 12  | 14  | 10  | 11  |
| Pal        | 4D145        | J1         | 14                   | _   | 13   | 17   | 23  | 11  | 11  | 12  | 14  | 10  | 11  |
| Pal        | 5D145        | J1         | 14                   | _   | 13   | 16   | 23  | 11  | 11  | 12  | 14  | 10  | 11  |
| Pal        | 6D145        | J1         | 14                   | _   | 13   | 16   | 23  | 10  | 11  | 12  | 14  | 10  | 12  |
| Pal        | 10D145       | J1         | 15                   | _   | 13   | 17   | 22  | 10  | 11  | 14  | 16  | 10  | 11  |
| Pal        | 23Z328       | J1         | 14                   | _   | 13   | 16   | 23  | 11  | 11  | 12  | 14  | 10  | 11  |
| Pal        | 9AJ49        | J1         | 16                   | _   | 13   | 18   | 23  | 11  | 11  | 12  | 13  | 10  | 12  |
| Pal        | 9AJ55        | J1         | 14                   | _   | 13   | 17   | 23  | 11  | 11  | 12  | 14  | 11  | 11  |
| Pal        | 10AJ55       | J1         | 14                   | _   | 13   | 17   | 23  | 11  | 12  | 12  | 14  | 10  | 12  |
| Pal        | 12AJ55       | J1         | 14                   | _   | 13   | 17   | 23  | 11  | 11  | 12  | 14  | 10  | 11  |
| Pal        | 14AJ55       | J1         | 14                   | _   | 13   | 17   | 23  | 11  | 11  | 12  | 14  | 10  | 11  |
| Pal        | 10AJ178      | J1         | 13                   | _   | 13   | 16   | 23  | 11  | 11  | 12  | 14  | 10  | 11  |
| Pal        | 12AJ152      | J1         | 15                   | _   | 13   | 17   | 23  | 11  | 11  | 12  | 14  | 10  | 11  |
| Pal        | 23AJ152      | J1         | 14                   | _   | 13   | 17   | 23  | 11  | 11  | 12  | 14  | 10  | 11  |

*AJHG*, Volume 83

| Population | DNA Ref. No. | Haplogroup | Allele Status at DYS |     |      |      |     |     |     |     |     |     |     |
|------------|--------------|------------|----------------------|-----|------|------|-----|-----|-----|-----|-----|-----|-----|
|            |              |            | 19                   | 388 | 389I | 389b | 390 | 391 | 392 | 393 | 437 | 438 | 439 |
| Pal        | 12AJ162      | J1         | 14                   | _   | 13   | 16   | 23  | 11  | 11  | 12  | 14  | 10  | 11  |
| Pal        | 15AJ162      | J1         | 15                   | _   | 13   | 18   | 23  | 11  | 11  | 12  | 14  | 10  | 11  |
| Pal        | 14AJ163      | J1         | 14                   | _   | 13   | 17   | 23  | 11  | 11  | 13  | 14  | 9   | 11  |
| Pal        | 9AJ184       | J1         | 14                   | _   | 13   | 16   | 22  | 11  | 11  | 12  | 14  | 10  | 11  |
| Pal        | 1AL23        | J1         | 14                   | _   | 13   | 17   | 23  | 11  | 11  | 12  | 14  | 10  | 11  |
| Pal        | 19AL31       | J1         | 14                   | _   | 14   | 16   | 23  | 11  | 11  | 12  | 14  | 10  | 11  |
| Pal        | 42AL23       | J1         | 14                   | _   | 13   | 16   | 23  | 11  | 11  | 12  | 14  | 10  | 11  |
| Pal        | 9AL23        | J1         | 14                   | _   | 13   | 18   | 23  | 10  | 11  | 12  | 14  | 10  | 11  |
| Pal        | 12AL23       | J1         | 14                   | _   | 13   | 18   | 23  | 10  | 11  | 13  | 14  | 10  | 11  |
| Pal        | 14AL23       | J1         | 15                   | _   | 13   | 16   | 23  | 10  | 11  | 12  | 14  | 9   | 11  |
| Pal        | 22AL30       | J1         | 14                   | _   | 13   | 16   | 23  | 11  | 11  | 12  | 14  | 10  | 11  |
| Pal        | 19AL23       | J1         | 14                   | _   | 13   | 16   | 23  | 11  | 11  | 12  | 14  | 10  | 11  |
| Pal        | 20AL23       | J1         | 16                   | _   | 13   | 18   | 24  | 11  | 11  | 13  | 15  | 10  | 13  |
| Pal        | 23AL23       | J1         | 14                   | _   | 13   | 17   | 23  | 10  | 11  | 12  | 14  | 10  | 11  |
| Pal        | 6AL30        | J1         | 14                   | _   | 13   | 17   | 22  | 10  | 11  | 12  | 14  | 10  | 11  |
| Pal        | 9AL30        | J1         | 14                   | _   | 14   | 15   | 24  | 11  | 11  | 12  | 14  | 10  | 10  |
| Pal        | 5AL32        | J1         | _                    | _   | _    | _    | _   | _   | _   | _   | _   | _   | _   |
| Pal        | 19AL24       | J1         | 14                   | _   | 13   | 16   | 23  | 10  | 11  | 12  | 15  | 9   | 12  |
| Pal        | 18AL31       | J1         | 15                   | _   | 13   | 17   | 23  | 11  | 11  | 12  | 14  | 10  | 11  |
| Pal        | 26AL33       | J1         | 15                   | _   | 13   | 17   | 23  | 11  | 11  | 12  | 14  | 10  | 11  |
| Pal        | 47AL25       | J1         | 14                   | _   | 13   | 17   | 23  | 11  | 11  | 12  | 14  | 10  | 11  |
| Pal        | 12AL27       | J1         | 14                   | _   | 13   | 15   | 22  | 11  | 11  | 12  | 14  | 11  | 11  |
| Pal        | 30AL23       | J1         | 14                   | _   | 13   | 16   | 22  | 11  | 11  | 12  | 14  | 10  | 11  |
| Pal        | 12AL30       | J1         | 14                   | _   | 13   | 16   | 22  | 11  | 11  | 12  | 14  | 10  | 12  |
| Pal        | 44AL24       | J1         | 14                   | _   | 13   | 15   | 22  | 11  | 11  | 12  | 14  | 11  | 11  |
| Pal        | 6AL27        | J1         | 14                   | _   | 13   | 16   | 22  | 11  | 11  | 12  | 14  | 10  | 11  |
| Pal        | 20AL31       | J1         | 14                   | _   | 13   | 17   | 24  | 10  | 11  | 12  | 14  | 10  | 11  |
| Pal        | 20AL33       | J1         | 14                   | _   | 13   | 17   | 24  | 11  | 11  | 12  | 14  | 10  | 11  |
| Pal        | 37AL23       | J1         | 14                   | _   | 13   | 16   | 22  | 11  | 11  | 12  | 14  | 10  | 11  |
| Pal        | 43AL23       | J1         | 14                   | _   | 13   | 16   | 23  | 11  | 11  | 12  | 14  | 10  | 11  |
| Pal        | 24AL25       | J1         | 14                   | _   | 13   | 18   | 23  | 10  | 11  | 12  | 14  | 10  | 11  |

*AJHG*, Volume 83

| Population | DNA Ref. No. | Haplogroup      | Allele Status at DYS |     |      |      |     |     |     |     |     |     |     |
|------------|--------------|-----------------|----------------------|-----|------|------|-----|-----|-----|-----|-----|-----|-----|
|            |              |                 | 19                   | 388 | 389I | 389b | 390 | 391 | 392 | 393 | 437 | 438 | 439 |
| Pal        | 11AL32       | J1              | 14                   | _   | 13   | 17   | 23  | 11  | 11  | 12  | 14  | 10  | 11  |
| Pal        | 6AL32        | J1              | 14                   | _   | 13   | 17   | 23  | 11  | 11  | 12  | 14  | 10  | 11  |
| Pal        | 1AL30        | J1              | 14                   | _   | 13   | 18   | 22  | 10  | 11  | 12  | 14  | 10  | 11  |
| Pal        | 2AL117       | J1              | 15                   | _   | 13   | 18   | 23  | 11  | 11  | 12  | 14  | 10  | 12  |
| Pal        | 3AL117       | J1              | 15                   | _   | 13   | 17   | 23  | 11  | 11  | 12  | 14  | 10  | 12  |
| Pal        | 17AL117      | J1              | 14                   | _   | 13   | 16   | 23  | 10  | 11  | 13  | 14  | 10  | 11  |
| Pal        | 1AL120       | J1              | 14                   | _   | 13   | 16   | 22  | 10  | 11  | 12  | 14  | 10  | 11  |
| Pal        | 10AL121      | J1              | 14                   | _   | 14   | 16   | 24  | 10  | 12  | 12  | 14  | 10  | 11  |
| Pal        | 11AL121      | J1              | 14                   | _   | 13   | 18   | 24  | 11  | 11  | 12  | 14  | 10  | 11  |
| Pal        | 11AL119      | J2/-f1*(xJ2f1a) | 15                   | 16  | 12   | 16   | 25  | 10  | 11  | 12  | 14  | 9   | 13  |
| Pal        | 9AL119       | J2/-f1*(xJ2f1a) | 14                   | 15  | 13   | 17   | 23  | 10  | 11  | 12  | 15  | 9   | 11  |
| Pal        | 5AL119       | J2/-f1*(xJ2f1a) | 14                   | 15  | 13   | 18   | 22  | 10  | 11  | 12  | 15  | 9   | 11  |
| Pal        | 11AL170      | J2/-f1*(xJ2f1a) | 13                   | 15  | 13   | 17   | 22  | 10  | 11  | 12  | 14  | 9   | 13  |
| Pal        | 10AL171      | J2/-f1*(xJ2f1a) | 14                   | 15  | 13   | 17   | 22  | 10  | 11  | 13  | 15  | 9   | 10  |
| Pal        | 2AL177       | J2/-f1*(xJ2f1a) | 14                   | 15  | 13   | 17   | 22  | 10  | 11  | 12  | 14  | 9   | 11  |
| Pal        | 4AL180       | J2/-f1*(xJ2f1a) | 14                   | 15  | 13   | 18   | 22  | 10  | 11  | 12  | 15  | 9   | 11  |
| Pal        | 16AL180      | J2a             | 12                   | 14  | 14   | 16   | 23  | 10  | 11  | 12  | 15  | 9   | 10  |
| Pal        | 20AL180      | J2a             | 12                   | 14  | 14   | 16   | 23  | 10  | 11  | 12  | 15  | 9   | 10  |
| Pal        | 23AL180      | J2a             | 12                   | 14  | 14   | 16   | 23  | 10  | 11  | 12  | 15  | 9   | 10  |
| Pal        | 36AL180      | J2a             | 12                   | 14  | 12   | 17   | 24  | 10  | 11  | 12  | 15  | 9   | 12  |
| Pal        | 2AL181       | J2a             | 13                   | 15  | 13   | 15   | 25  | 10  | 11  | 13  | 15  | 9   | 12  |
| Pal        | 4AL181       | J2a             | 14                   | 12  | 13   | 16   | 23  | 10  | 11  | 12  | 15  | 9   | 12  |
| Pal        | 7AL181       | J2a             | 16                   | 17  | 12   | 16   | 24  | 11  | 11  | 12  | 15  | 9   | 12  |
| Pal        | 10AL181      | J2a             | 15                   | 17  | 12   | 16   | 23  | 10  | 11  | 12  | 15  | 9   | 11  |
| Pal        | 12AL181      | J2a             | 14                   | 13  | 13   | 17   | 23  | 10  | 11  | 12  | 15  | 9   | 12  |
| Pal        | 13AL181      | J2a             | 14                   | 14  | 13   | 17   | 18  | 10  | 11  | 12  | 14  | 9   | 11  |
| Pal        | 14AL181      | J2a             | 16                   | 15  | 13   | 17   | 23  | 10  | 11  | 12  | 15  | 9   | 13  |
| Pal        | 16AL181      | J2a             | 15                   | 15  | 11   | 17   | 22  | 10  | 8   | 12  | 15  | 9   | 12  |
| Pal        | 17AL181      | J2a             | 15                   | 15  | 11   | 17   | 22  | 10  | 8   | 12  | 15  | 9   | 12  |
| Pal        | 22AL181      | J2a             | 15                   | 16  | 13   | 16   | 23  | 10  | 11  | 12  | 14  | 9   | 12  |
| Pal        | 23AL181      | J2a             | 14                   | _   | 14   | 16   | 23  | 10  | 11  | 12  | 15  | 9   | 10  |



*AJHG*, Volume 83

| Population | DNA Ref. No. | Haplogroup          | Allele Status at DYS |     |      |      |     |     |     |     |     |     |     |
|------------|--------------|---------------------|----------------------|-----|------|------|-----|-----|-----|-----|-----|-----|-----|
|            |              |                     | 19                   | 388 | 389I | 389b | 390 | 391 | 392 | 393 | 437 | 438 | 439 |
| Pal        | 24AL181      | J2a                 | 14                   | 15  | 13   | 15   | 23  | 10  | 11  | 12  | 15  | 9   | 11  |
| Pal        | 34AL181      | J2a                 | 14                   | 15  | 13   | 15   | 23  | 10  | 11  | 12  | 15  | 9   | 11  |
| Pal        | 45AL181      | J2a                 | 14                   | 16  | 13   | 16   | 23  | 11  | 11  | 12  | 16  | 9   | 12  |
| Pal        | 46AL181      | J2a                 | 15                   | 15  | 12   | 17   | 24  | 10  | 11  | 12  | 14  | 9   | 12  |
| Pal        | 48AL181      | J2a                 | 14                   | 15  | 13   | 17   | 23  | 10  | 11  | 13  | 14  | 10  | 11  |
| Pal        | 7D145        | J2a                 | 16                   | 14  | 13   | 16   | 24  | 10  | 11  | 12  | 15  | 9   | 12  |
| Pal        | 8D145        | J2a                 | 14                   | 14  | 14   | 17   | 24  | 10  | 11  | 12  | 15  | 9   | 12  |
| Pal        | 6D157        | J2a                 | 16                   | 14  | 13   | 16   | 23  | 10  | 11  | 12  | 14  | 12  | 11  |
| Pal        | 9D157        | J2a                 | 14                   | 15  | 13   | 18   | 22  | 10  | 11  | 12  | 15  | 9   | 11  |
| Pal        | 11D157       | J2a                 | 14                   | 15  | 13   | 16   | 23  | 11  | 11  | 12  | 14  | 10  | 11  |
| Pal        | 10R'188      | J2a                 | 14                   | 16  | 13   | 17   | 23  | 10  | 11  | 12  | 15  | 9   | 11  |
| Pal        | 11X81        | J2e*(xJ2e1)         | 16                   | 15  | 12   | 16   | 24  | 11  | 11  | 12  | 16  | 9   | 12  |
| Pal        | 9R172        | J2e*(xJ2e1)         | 15                   | 15  | 12   | 16   | 24  | 10  | 11  | 12  | 14  | 9   | 13  |
| Pal        | 8AJ55        | J2e*(xJ2e1)         | 15                   | 15  | 14   | 16   | 23  | 11  | 11  | 12  | 16  | 9   | 9   |
| Pal        | 11AJ55       | J2e*(xJ2e1)         | 16                   | 15  | 12   | 16   | 24  | 11  | 11  | 12  | 16  | 9   | 12  |
| Pal        | 10AJ152      | J2e*(xJ2e1)         | 15                   | 15  | 12   | 18   | 24  | 10  | 11  | 12  | 14  | 9   | 12  |
| Pal        | 10AJ163      | J2e*(xJ2e1)         | 15                   | 15  | 12   | 18   | 24  | 10  | 11  | 12  | 14  | 9   | 12  |
| Pal        | 19AJ163      | J2e*(xJ2e1)         | 15                   | 15  | 12   | 18   | 24  | 10  | 11  | 12  | 14  | 9   | 12  |
| Pal        | 11AL23       | K*(xK2,K3,L,M,NO,P) | 14                   | _   | 13   | 16   | 22  | 11  | 11  | 12  | 14  | 10  | 11  |
| Pal        | 23AL24       | K*(xK2,K3,L,M,NO,P) | _                    | _   | _    | _    | _   | _   | _   | _   | _   | _   | _   |
| Pal        | 39AL23       | K2                  | 11                   | 12  | 14   | 16   | 23  | 10  | 13  | 14  | 14  | 9   | 10  |
| Pal        | 33AL24       | K2                  | 11                   | 12  | 12   | 17   | 23  | 11  | 14  | 13  | 14  | 9   | 12  |
| Pal        | 27AL25       | K2                  | 11                   | 12  | 14   | 16   | 23  | 11  | 13  | 13  | 15  | 9   | 12  |
| Pal        | 14AL31       | K2                  | 14                   | _   | 14   | 16   | 23  | 10  | 11  | 13  | 14  | 9   | 11  |
| Pal        | 27AL33       | K2                  | 15                   | _   | 13   | 17   | 23  | 10  | 13  | 13  | 14  | 9   | 11  |
| Pal        | 1AL32        | K2                  | 13                   | _   | 13   | 16   | 23  | 10  | 13  | 13  | 14  | 9   | 11  |
| Pal        | 7AL121       | N / O               | 16                   | _   | 12   | 15   | 26  | 11  | 13  | 12  | 14  | 10  | 13  |
| Pal        | 7AL180       | R*                  | 14                   | _   | 13   | 16   | 22  | 10  | 13  | 12  | 15  | 12  | 13  |
| Pal        | 40AL181      | R1/-b1a             | 13                   | 13  | 14   | 16   | 24  | 10  | 13  | 13  | 14  | 12  | 13  |
| Pal        | 42AL181      | R1/-b1c             | 12                   | 12  | 13   | 16   | 24  | 10  | 13  | 13  | 15  | 12  | 11  |
| Pal        | 6AL97        | R1/-b1c             | 12                   | 12  | 13   | 16   | 25  | 10  | 13  | 12  | 15  | 11  | 11  |

*AJHG*, Volume 83

| Population | DNA Ref. No. | Haplogroup | Allele Status at DYS |     |      |      |     |     |     |     |     |     |     |
|------------|--------------|------------|----------------------|-----|------|------|-----|-----|-----|-----|-----|-----|-----|
|            |              |            | 19                   | 388 | 389I | 389b | 390 | 391 | 392 | 393 | 437 | 438 | 439 |
| Pal        | 1AL133       | R1/-b1c    | 14                   | _   | 13   | 15   | 24  | 10  | 14  | 12  | 15  | 13  | 14  |
| Pal        | 13AJ163      | R1/-b1c    | 14                   | _   | 13   | 16   | 24  | 10  | 13  | 12  | 15  | 12  | 12  |
| Pal        | 11AL24       | R1/-b1c    | 14                   | _   | 14   | 16   | 24  | 10  | 12  | 12  | 15  | 12  | 11  |
| Pal        | 40AL26       | R1a1       | 16                   | _   | 13   | 18   | 24  | 11  | 11  | 13  | 14  | 11  | 11  |
| Pal        | 8AL33        | R1a1       | 14                   | 12  | 13   | 17   | 25  | 10  | 11  | 13  | 14  | 11  | 10  |
| Pal        | 1AL33        | R1a1       | 16                   | _   | 13   | 16   | 25  | 10  | 11  | 13  | 14  | 11  | 11  |
| Pal        | 16AJ162      |            | 12                   | 17  | 13   | 17   | 23  | 11  | 11  | 12  | 14  | 9   | 11  |
| Pal        | 12AL31       |            | 12                   | 15  | 13   | 16   | 24  | 10  | 11  | 12  | 15  | 9   | 12  |
| Pal        | 16AL33       |            | 16                   | _   | 13   | 17   | 24  | 11  | 11  | 13  | 14  | 11  | 11  |
| Pal        | 3D157        |            | 14                   | _   | 14   | 17   | 23  | 10  | 11  | 12  | 14  | 10  | 11  |
| Pal        | 8AL180       |            | 13                   | _   | 14   | 17   | 26  | 10  | 11  | 13  | 14  | 10  | 11  |
| Pal        | 9AL180       |            | 14                   | _   | 13   | 16   | 24  | 11  | 13  | 12  | 15  | 12  | 12  |
| Pal        | 21AL181      |            | 15                   | _   | 14   | 16   | 24  | 10  | 14  | 13  | 14  | 13  | 13  |
| Pal        | 5S'112       |            | 16                   | _   | 13   | 18   | 23  | 10  | 11  | 13  | 14  | 10  | 11  |
| Pal        | 18AE372      |            | 13                   | _   | 14   | 16   | 24  | 9   | 11  | 13  | 14  | 10  | 10  |
| Pal        | 16AE360      |            | 13                   | _   | 13   | 16   | 24  | 9   | 11  | 13  | 14  | 10  | 10  |
| Pal        | 9AJ57        |            | 13                   | _   | 13   | 17   | 25  | 11  | 11  | 14  | 14  | 11  | 12  |
| Pal        | 9AJ163       |            | 15                   | _   | 13   | 15   | 24  | 9   | 11  | 13  | 14  | 10  | 10  |
| Pal        | 17AJ163      |            | 16                   | _   | 12   | 17   | 22  | 10  | 11  | 13  | 17  | 10  | 12  |
| Pal        | 2AL31        |            | 13                   | _   | 13   | 17   | 24  | 10  | 11  | 13  | 14  | 10  | 12  |
| Pal        | 28AL23       |            | 14                   | _   | 12   | 17   | 22  | 10  | 11  | 12  | 16  | 10  | 12  |
| Pal        | 21AL24       |            | 13                   | _   | 14   | 16   | 24  | 9   | 11  | 13  | 14  | 10  | 10  |
| Pal        | 6AL31        |            | 13                   | _   | 14   | 16   | 24  | 9   | 11  | 13  | 14  | 10  | 10  |
| Pal        | 14AL180      |            | 14                   | _   | 12   | 16   | 25  | 11  | 11  | 13  | 14  | 11  | 12  |
| Pal        | 19AL180      |            | 15                   | _   | 13   | 17   | 21  | 10  | 11  | 15  | 14  | 11  | 11  |
| Pal        | 15AL181      |            | 14                   | 15  | 13   | 19   | 23  | 10  | 11  | 12  | 14  | 10  | 11  |
| Pal        | 39AL25       |            | 15                   | _   | 13   | 17   | 23  | 10  | 11  | 13  | 14  | 10  | 12  |
| Pal        | 6AL24        |            | 13                   | _   | 14   | 16   | 24  | 9   | 11  | 13  | 14  | 10  | 10  |
| Pal        | 21AJ152      |            | 13                   | _   | 14   | 18   | 25  | 11  | 11  | 12  | 14  | 9   | 13  |
| Pal        | 22AJ152      |            | 11                   | _   | 13   | 17   | 25  | 10  | 12  | 13  | 14  | 11  | 11  |
| Pal        | 12AL171      |            | 13                   | _   | 12   | 18   | 25  | 10  | 11  | 14  | 14  | 10  | 12  |

*AJHG*, Volume 83

| Population                                  | DNA Ref. No. | Haplogroup  | Allele Status at DYS |     |      |      |     |     |     |     |     |     |     |
|---------------------------------------------|--------------|-------------|----------------------|-----|------|------|-----|-----|-----|-----|-----|-----|-----|
|                                             |              |             | 19                   | 388 | 389I | 389b | 390 | 391 | 392 | 393 | 437 | 438 | 439 |
| Pal                                         | 34AL180      |             | 15                   | _   | 13   | 16   | 24  | 10  | 11  | 13  | 14  | 11  | 11  |
| Pal                                         | 3R'178       |             | 14                   | _   | 13   | 17   | 24  | 10  | 12  | 15  | 14  | 10  | 11  |
| Pal                                         | 1D145        |             | 14                   | _   | 12   | 15   | 23  | 10  | 11  | 12  | 16  | 9   | 12  |
| Pal                                         | 10AJ49       |             | 16                   | _   | 13   | 19   | 23  | 10  | 11  | 13  | 15  | 10  | 13  |
| Pal                                         | 1AJ121       |             | 14                   | _   | 14   | 16   | 19  | 11  | 13  | 13  | 14  | 10  | 13  |
| Pal                                         | 12AJ183      |             | 14                   | _   | 14   | 16   | 23  | 11  | 13  | 13  | 14  | 12  | 12  |
| Pal                                         | 13AL23       |             | 16                   | _   | 12   | 18   | 23  | 11  | 11  | 14  | 15  | 10  | 11  |
| Pal                                         | 9AL31        |             | 14                   | _   | 13   | 16   | 24  | 10  | 12  | 14  | 16  | 10  | 12  |
| Pal                                         | 32AL24       |             | 14                   | _   | 14   | 16   | 19  | 11  | 13  | 13  | 14  | 10  | 13  |
| Pal                                         | 8AL171       |             | 14                   | _   | 13   | 15   | 25  | 11  | 15  | 13  | 15  | 12  | 12  |
| Pal                                         | 21AL180      |             | 14                   | _   | 14   | 16   | 23  | 10  | 13  | 13  | 14  | 9   | 11  |
| Pal                                         | 25AL180      |             | _                    | _   | _    | _    | _   | _   | _   | _   | _   | _   | _   |
| Pal                                         | 38AL180      |             | 14                   | _   | 13   | 16   | 24  | 10  | 15  | 13  | 14  | 9   | 11  |
| Pal                                         | 8AL181       |             | 14                   | _   | 13   | 16   | 24  | 10  | 13  | 12  | 15  | 12  | 12  |
| Pal                                         | 27AL181      |             | 15                   | _   | 13   | 16   | 24  | 10  | 13  | 13  | 14  | 12  | 12  |
| Pal                                         | 28AL181      |             | 15                   | _   | 13   | 16   | 24  | 10  | 13  | 13  | 14  | 12  | 13  |
| Pal                                         | 37AL181      |             | 14                   | _   | 13   | 15   | 24  | 10  | 14  | 12  | 16  | 12  | 13  |
| Pal                                         | 4AL116       |             | 15                   | _   | 14   | 16   | 22  | 10  | 13  | 13  | 14  | 12  | 13  |
| Pal                                         | 5AL29        |             | 14                   | _   | 13   | 15   | 24  | 10  | 14  | 12  | 16  | 12  | 12  |
| Pal                                         | 3D145        |             | 14                   | _   | 13   | 16   | 24  | 10  | 14  | 12  | 15  | 12  | 13  |
| Pal                                         | 1AL180       |             | 15                   | _   | 13   | 16   | 24  | 10  | 13  | 14  | 14  | 12  | 12  |
| Pal                                         | 1AM89        |             | 14                   | _   | 13   | 16   | 25  | 10  | 13  | 13  | 15  | 12  | 12  |
| Pal                                         | 2AM89        |             | 15                   | _   | 14   | 16   | 23  | 11  | 13  | 13  | 14  | 12  | 12  |
| Pal                                         | 3AM89        |             | 14                   | _   | 14   | 16   | 24  | 11  | 13  | 13  | 15  | 12  | 12  |
| <b>Populations from Phoenician Colonies</b> |              |             |                      |     |      |      |     |     |     |     |     |     |     |
| Cyp                                         | 223604       | E3b (xE3b3) | 13                   | 12  | 13   | 17   | 24  | 10  | 11  | 13  | 14  | 10  | 12  |
| Cyp                                         | 223651       | E3b3        | 13                   | 12  | 12   | 18   | 23  | 10  | 12  | 13  | 14  | 10  | 11  |
| Cyp                                         | 224247       | E3b (xE3b3) | 13                   | 12  | 13   | 17   | 24  | 10  | 11  | 13  | 14  | 10  | 13  |
| Cyp                                         | 225239       | E3b (xE3b3) | 13                   | 12  | 13   | 17   | 24  | 10  | 11  | 14  | 14  | 10  | 11  |
| Cyp                                         | 223124       | E3b (xE3b3) | 14                   | 12  | 13   | 14   | 24  | 10  | 11  | 13  | 14  | 10  | 12  |
| Cyp                                         | 224658       | E3b3        | 13                   | 12  | 13   | 15   | 24  | 10  | 11  | 13  | 14  | 10  | 11  |

*AJHG*, Volume 83

| Population | DNA Ref. No. | Haplogroup  | Allele Status at DYS |     |      |      |     |     |     |     |     |     |     |
|------------|--------------|-------------|----------------------|-----|------|------|-----|-----|-----|-----|-----|-----|-----|
|            |              |             | 19                   | 388 | 389I | 389b | 390 | 391 | 392 | 393 | 437 | 438 | 439 |
| Cyp        | 223217       | E3b3        | 13                   | 12  | 14   | 18   | 24  | 10  | 11  | 13  | 14  | 10  | 11  |
| Cyp        | 223534       | E3b (xE3b3) | 13                   | 13  | 13   | 17   | 24  | 10  | 11  | 13  | 14  | 10  | 14  |
| Cyp        | 225112       | E3b3        | 13                   | 12  | 13   | 19   | 23  | 11  | 11  | 13  | 14  | 10  | 13  |
| Cyp        | 225609       | E3b3        | 13                   | 12  | 13   | 18   | 24  | 10  | 11  | 13  | 14  | 10  | 12  |
| Cyp        | 231022       | E3b (xE3b3) | 13                   | 12  | 13   | 17   | 24  | 10  | 11  | 13  | 14  | 10  | 12  |
| Cyp        | 223937       | E3b3        | 13                   | 12  | 13   | 19   | 24  | 10  | 12  | 13  | 14  | 10  | 12  |
| Cyp        | 232112       | E3b (xE3b3) | 13                   | 12  | 14   | 18   | 24  | 10  | 11  | 12  | 14  | 10  | 13  |
| Cyp        | 232895       | E3b (xE3b3) | 13                   | 12  | 13   | 18   | 24  | 9   | 11  | 12  | 14  | 10  | 12  |
| Cyp        | 217491       | E3b (xE3b3) | 14                   | 12  | 13   | 16   | 23  | 10  | 11  | 12  | 14  | 9   | 12  |
| Cyp        | 218056       | E3b (xE3b3) | 14                   | 12  | 13   | 16   | 23  | 10  | 11  | 12  | 14  | 9   | 12  |
| Cyp        | 217078       | E3b3        | 14                   | 12  | 13   | 16   | 23  | 10  | 11  | 12  | 14  | 9   | 12  |
| Cyp        | 231414       | E3b (xE3b3) | 14                   | 12  | 13   | 16   | 23  | 10  | 11  | 12  | 14  | 9   | 12  |
| Cyp        | 218186       | E3b (xE3b3) | 14                   | 12  | 13   | 17   | 25  | 10  | 11  | 12  | 14  | 10  | 14  |
| Cyp        | CYP 03       | E3b3        | 13                   | 12  | 13   | 17   | 26  | 10  | 11  | 14  | 14  | 10  | 12  |
| Cyp        | CYP 12       | E           | 13                   | 12  | 13   | 16   | 24  | 10  | 11  | 13  | 15  | 10  | 13  |
| Cyp        | CYP 14       | E3b (xE3b3) | 13                   | 12  | 13   | 17   | 24  | 10  | 11  | 13  | 15  | 10  | 12  |
| Cyp        | CYP 18       | E3b3        | 13                   | 12  | 13   | 19   | 24  | 10  | 11  | 13  | 14  | 10  | 12  |
| Cyp        | CYP 20       | E3b (xE3b3) | 13                   | 12  | 13   | 17   | 24  | 10  | 11  | 13  | 14  | 10  | 12  |
| Cyp        | CYP 24       | E3b (xE3b3) | 13                   | 12  | 13   | 18   | 23  | 10  | 11  | 13  | 14  | 10  | 12  |
| Cyp        | CYP 25       | E3b (xE3b3) | 13                   | 12  | 13   | 17   | 24  | 10  | 11  | 13  | 14  | 10  | 12  |
| Cyp        | CYP 26       | E3b3        | 13                   | 12  | 13   | 19   | 24  | 10  | 12  | 13  | 14  | 10  | 12  |
| Cyp        | CYP 27       | E3b3        | 13                   | 12  | 12   | 18   | 23  | 10  | 11  | 13  | 14  | 10  | 11  |
| Cyp        | CYP 29       | E3b (xE3b3) | 13                   | 12  | 13   | 17   | 24  | 10  | 11  | 13  | 14  | 8   | 12  |
| Cyp        | CYP 32       | E3b3        | 13                   | 12  | 13   | 19   | 25  | 10  | 12  | 13  | 14  | 10  | 12  |
| Cyp        | CYP 38       | E3b3        | 13                   | 12  | 12   | 18   | 25  | 10  | 11  | 13  | 14  | 10  | 13  |
| Cyp        | CYP 43       | E3b3        | 13                   | 12  | 13   | 17   | 24  | 10  | 11  | 14  | 14  | 10  | 12  |
| Cyp        | CYP 46       | E3b3        | 13                   | 12  | 13   | 19   | 24  | 11  | 11  | 12  | 14  | 10  | 12  |
| Cyp        | 2AJ21        | E(-3a,3b)   | 15                   | 13  | 11   | 17   | 22  | 10  | 11  | 14  | 17  | 10  | 11  |
| Cyp        | 24AJ19       | E3b         | 13                   | 12  | 14   | 17   | 24  | 10  | 11  | 13  | 14  | 10  | 11  |
| Cyp        | 8AJ21        | E3b         | 14                   | 12  | 14   | 17   | 24  | 10  | 13  | 13  | 14  | 11  | 11  |
| Cyp        | 5AJ19        | E3b1        | 14                   | 12  | 14   | 17   | 24  | 11  | 13  | 13  | 14  | 11  | 11  |

*AJHG*, Volume 83

| Population | DNA Ref. No. | Haplogroup | Allele Status at DYS |     |      |      |     |     |     |     |     |     |     |
|------------|--------------|------------|----------------------|-----|------|------|-----|-----|-----|-----|-----|-----|-----|
|            |              |            | 19                   | 388 | 389I | 389b | 390 | 391 | 392 | 393 | 437 | 438 | 439 |
| Cyp        | 8AJ19        | E3b1       | 14                   | 12  | 14   | 17   | 24  | 10  | 13  | 13  | 14  | 11  | 11  |
| Cyp        | 1AJ21        | E3b1       | 14                   | 16  | 14   | 17   | 24  | 10  | 13  | 13  | 14  | 11  | 11  |
| Cyp        | 9AJ21        | E3b1       | 14                   | 12  | 14   | 17   | 24  | 10  | 13  | 13  | 14  | 11  | 11  |
| Cyp        | 13AJ21       | E3b1       | 14                   | 12  | 14   | 17   | 24  | 11  | 13  | 13  | 14  | 11  | 11  |
| Cyp        | 6AJ191       | E3b1       | 14                   | 14  | 13   | 16   | 23  | 10  | 11  | 12  | 14  | 9   | 12  |
| Cyp        | 3AJ19        | E3b3       | 13                   | 12  | 13   | 19   | 23  | 10  | 11  | 13  | 14  | 10  | 12  |
| Cyp        | 10AJ19       | E3b3       | -                    | -   | -    | -    | -   | -   | -   | -   | -   | -   | -   |
| Cyp        | 14AJ19       | E3b3       | 15                   | 12  | 13   | 17   | 26  | 11  | 11  | 14  | 14  | 10  | 11  |
| Cyp        | 15AJ19       | E3b3       | 13                   | 12  | 13   | 17   | 24  | 9   | 11  | 14  | 14  | 10  | 12  |
| Cyp        | 25AJ19       | E3b3       | 13                   | 12  | 13   | 19   | 23  | 10  | 10  | 13  | 14  | 10  | 12  |
| Cyp        | 29AJ19       | E3b3       | 13                   | 14  | 13   | 17   | 24  | 9   | 11  | 14  | 14  | 10  | 12  |
| Cyp        | 5AJ21        | E3b3       | 13                   | 12  | 13   | 19   | 23  | 10  | 11  | 13  | 14  | 10  | 12  |
| Cyp        | 7AJ21        | E3b3       | 13                   | 12  | 13   | 19   | 23  | 10  | 11  | 13  | 14  | 10  | 12  |
| Cyp        | 21AJ21       | E3b3       | 13                   | 12  | 13   | 17   | 24  | 9   | 11  | 14  | 14  | 10  | 12  |
| Cyp        | 24AJ21       | E3b3       | 13                   | 12  | 13   | 19   | 23  | 10  | 11  | 13  | 14  | 10  | 12  |
| Cyp        | 28AJ21       | E3b3       | 13                   | 12  | 13   | 19   | 23  | 10  | 11  | 13  | 14  | 10  | 12  |
| Cyp        | 225874       | G          | 15                   | 12  | 12   | 16   | 22  | 10  | 11  | 14  | 16  | 10  | 13  |
| Cyp        | 225441       | G          | 15                   | 12  | 12   | 17   | 21  | 10  | 11  | 13  | 16  | 10  | 11  |
| Cyp        | 232846       | G          | 17                   | 12  | 12   | 18   | 22  | 11  | 11  | 14  | 16  | 10  | 11  |
| Cyp        | 224146       | G          | 15                   | 12  | 12   | 15   | 22  | 10  | 11  | 15  | 16  | 10  | 11  |
| Cyp        | 215160       | G          | 16                   | 12  | 12   | 16   | 22  | 10  | 10  | 14  | 16  | 10  | 11  |
| Cyp        | 227874       | G          | 16                   | 12  | 12   | 15   | 21  | 10  | 11  | 15  | 17  | 10  | 11  |
| Cyp        | 231971       | G          | 15                   | 12  | 12   | 18   | 23  | 10  | 11  | 14  | 16  | 10  | 11  |
| Cyp        | 230514       | G          | 15                   | 14  | 12   | 18   | 21  | 10  | 11  | 15  | 16  | 9   | 11  |
| Cyp        | 217959       | G          | 14                   | 12  | 13   | 16   | 23  | 10  | 11  | 12  | 14  | 9   | 12  |
| Cyp        | 216548       | G          | 14                   | 12  | 13   | 16   | 23  | 10  | 11  | 12  | 14  | 9   | 12  |
| Cyp        | 218751       | G          | 14                   | 12  | 13   | 16   | 23  | 10  | 11  | 12  | 14  | 9   | 12  |
| Cyp        | 230984       | G          | 14                   | 12  | 13   | 16   | 23  | 10  | 11  | 12  | 14  | 9   | 12  |
| Cyp        | 230109       | G          | 14                   | 12  | 13   | 16   | 23  | 10  | 11  | 12  | 14  | 9   | 12  |
| Cyp        | 217364       | G          | 16                   | 12  | 13   | 16   | 22  | 10  | 10  | 12  | 14  | 10  | 12  |
| Cyp        | 218983       | G          | 16                   | 12  | 13   | 18   | 23  | 10  | 11  | 12  | 14  | 10  | 12  |

*AJHG*, Volume 83

| Population | DNA Ref. No. | Haplogroup | Allele Status at DYS |     |      |      |     |     |     |     |     |     |     |
|------------|--------------|------------|----------------------|-----|------|------|-----|-----|-----|-----|-----|-----|-----|
|            |              |            | 19                   | 388 | 389I | 389b | 390 | 391 | 392 | 393 | 437 | 438 | 439 |
| Cyp        | 230108       | G          | 14                   | 12  | 13   | 16   | 23  | 10  | 11  | 12  | 14  | 9   | 11  |
| Cyp        | CYP 11       | G          | 16                   | 12  | 12   | 16   | 22  | 11  | 10  | 14  | 16  | 10  | 11  |
| Cyp        | CYP 13       | G          | 15                   | 12  | 14   | 17   | 22  | 10  | 11  | 13  | 17  | 10  | 12  |
| Cyp        | CYP 17       | G          | 16                   | 12  | 12   | 18   | 23  | 10  | 11  | 12  | 16  | 10  | 11  |
| Cyp        | CYP 22       | G          | 15                   | 12  | 12   | 17   | 23  | 10  | 11  | 12  | 16  | 10  | 11  |
| Cyp        | CYP 23       | G          | 15                   | 12  | 12   | 17   | 21  | 10  | 11  | 14  | 16  | 10  | 11  |
| Cyp        | CYP 40       | G          | 15                   | 13  | 12   | 17   | 22  | 10  | 11  | 14  | 15  | 10  | 11  |
| Cyp        | 233900       | H          | 14                   | 15  | 12   | 16   | 23  | 10  | 11  | 12  | 14  | 9   | 10  |
| Cyp        | CYP 35       | I          | 17                   | 13  | 13   | 18   | 23  | 10  | 11  | 12  | 14  | 10  | 12  |
| Cyp        | 223766       | J1         | 14                   | 17  | 13   | 17   | 23  | 11  | 11  | 12  | 14  | 10  | 11  |
| Cyp        | 224128       | J1         | 14                   | 16  | 13   | 17   | 23  | 10  | 11  | 12  | 14  | 10  | 11  |
| Cyp        | 225677       | J(xJ1)     | 14                   | 15  | 14   | 17   | 23  | 10  | 11  | 12  | 14  | 9   | 12  |
| Cyp        | 225916       | J(xJ1)     | 14                   | 15  | 13   | 16   | 23  | 10  | 11  | 12  | 14  | 9   | 12  |
| Cyp        | 223324       | J(xJ1)     | 14                   | 15  | 14   | 16   | 23  | 10  | 11  | 12  | 14  | 9   | 10  |
| Cyp        | 224809       | J(xJ1)     | 14                   | 15  | 13   | 16   | 23  | 10  | 11  | 12  | 14  | 9   | 11  |
| Cyp        | 224085       | J1         | 14                   | 16  | 14   | 17   | 23  | 10  | 11  | 12  | 14  | 11  | 11  |
| Cyp        | 223782       | J(xJ1)     | 14                   | 15  | 13   | 16   | 23  | 11  | 11  | 12  | 15  | 10  | 11  |
| Cyp        | 236269       | J(xJ1)     | 14                   | 15  | 13   | 16   | 23  | 10  | 11  | 12  | 15  | 9   | 12  |
| Cyp        | 225686       | J2e        | 15                   | 15  | 12   | 16   | 23  | 10  | 11  | 12  | 16  | 9   | 8   |
| Cyp        | 229749       | J2/-f1     | 14                   | 15  | 13   | 16   | 23  | 8   | 11  | 11  | 15  | 9   | 11  |
| Cyp        | 224800       | J1         | 14                   | 13  | 12   | 21   | 23  | 10  | 11  | 12  | 14  | 10  | 12  |
| Cyp        | 224133       | J          | 14                   | 15  | 14   | 17   | 23  | 11  | 11  | 12  | 14  | 9   | 11  |
| Cyp        | 232291       | J2/-f1     | 14                   | 16  | 14   | 17   | 23  | 10  | 11  | 12  | 15  | 9   | 11  |
| Cyp        | 236568       | J          | 15                   | 16  | 13   | 16   | 23  | 10  | 11  | 13  | 14  | 9   | 13  |
| Cyp        | 231158       | J          | 16                   | –   | 13   | 17   | 23  | 10  | 11  | 12  | 15  | 9   | 11  |
| Cyp        | 230535       | J          | –                    | –   | –    | –    | –   | –   | –   | –   | –   | –   | –   |
| Cyp        | 231233       | J(xJ1)     | 15                   | 16  | 13   | 16   | 23  | 9   | 11  | 12  | 14  | 9   | 13  |
| Cyp        | 217308       | J          | 14                   | –   | 13   | 16   | 23  | 10  | 11  | 12  | 14  | 9   | 12  |
| Cyp        | 217450       | J2e        | 14                   | 15  | 13   | 16   | 24  | 11  | 11  | 12  | 14  | 9   | 12  |
| Cyp        | 216652       | J1         | 14                   | 16  | 13   | 16   | 23  | 10  | 11  | 12  | 14  | 9   | 12  |
| Cyp        | 218030       | J2e        | 14                   | 15  | 13   | 16   | 23  | 10  | 11  | 12  | 14  | 9   | 12  |

*AJHG*, Volume 83

| Population | DNA Ref. No. | Haplogroup | Allele Status at DYS |     |      |      |     |     |     |     |     |     |     |
|------------|--------------|------------|----------------------|-----|------|------|-----|-----|-----|-----|-----|-----|-----|
|            |              |            | 19                   | 388 | 389I | 389b | 390 | 391 | 392 | 393 | 437 | 438 | 439 |
| Cyp        | 218498       | J          | 14                   | 16  | 13   | 16   | 23  | 10  | 11  | 12  | 14  | 9   | 12  |
| Cyp        | 230114       | J(xJ1)     | 14                   | 15  | 13   | 16   | 23  | 10  | 11  | 12  | 14  | 9   | 12  |
| Cyp        | 216381       | J2/-f1     | 15                   | 13  | 13   | 17   | 23  | 10  | 11  | 12  | 14  | 9   | 12  |
| Cyp        | CYP 02       | J2/-f1     | 15                   | 15  | 13   | 16   | 24  | 10  | 11  | 12  | 14  | 9   | 10  |
| Cyp        | CYP 06       | J(xJ1)     | 15                   | 16  | 14   | 16   | 24  | 9   | 11  | 12  | 14  | 9   | 11  |
| Cyp        | CYP 07       | J(xJ1)     | 15                   | 12  | 13   | 17   | 24  | 10  | 11  | 12  | 15  | 9   | 12  |
| Cyp        | CYP 08       | J          | 14                   | _   | 12   | 18   | 23  | 10  | 11  | 12  | 14  | 10  | 11  |
| Cyp        | CYP 19       | J2/-f1     | 15                   | 15  | 11   | 17   | 24  | 11  | 11  | 12  | 17  | 9   | 11  |
| Cyp        | CYP 28       | J(xJ1)     | 14                   | 15  | 14   | 18   | 23  | 10  | 11  | 12  | 14  | 9   | 11  |
| Cyp        | CYP 30       | J1         | 15                   | 16  | 13   | 16   | 23  | 10  | 11  | 12  | 14  | 10  | 11  |
| Cyp        | CYP 31       | J2/-f1     | 14                   | 17  | 13   | 17   | 24  | 10  | 11  | 12  | 15  | 9   | 11  |
| Cyp        | CYP 34       | J2e        | 15                   | 15  | 12   | 16   | 24  | 10  | 11  | 12  | 16  | 9   | 12  |
| Cyp        | CYP 37       | J1         | 14                   | 16  | 13   | 17   | 23  | 10  | 11  | 12  | 14  | 10  | 11  |
| Cyp        | CYP 41       | J2e        | 15                   | 15  | 12   | 16   | 22  | 10  | 11  | 11  | 14  | 9   | 13  |
| Cyp        | CYP 42       | J(xJ1)     | 16                   | 15  | 13   | 16   | 23  | 9   | 11  | 12  | 15  | 9   | 12  |
| Cyp        | CYP 44       | J(xJ1)     | 15                   | 14  | 13   | 17   | 23  | 10  | 11  | 12  | 14  | 9   | 12  |
| Cyp        | 4AJ19        | J1         | 14                   | 16  | 14   | 17   | 23  | 10  | 11  | 12  | 14  | 10  | 11  |
| Cyp        | 7AJ19        | J1         | 14                   | 15  | 13   | 17   | 23  | 10  | 11  | 12  | 14  | 10  | 11  |
| Cyp        | 11AJ19       | J1         | 14                   | 16  | 14   | 17   | 23  | 10  | 11  | 12  | 14  | 10  | 11  |
| Cyp        | 26AJ19       | J1         | 14                   | 16  | 14   | 17   | 23  | 10  | 11  | 12  | 14  | 10  | 11  |
| Cyp        | 27AJ19       | J1         | 14                   | 16  | 14   | 17   | 23  | 10  | 11  | 12  | 14  | 10  | 11  |
| Cyp        | 11AJ21       | J1         | 14                   | 16  | 14   | 17   | 21  | 10  | 11  | 12  | 14  | 10  | 11  |
| Cyp        | 19AJ21       | J1         | 14                   | 16  | 14   | 17   | 23  | 10  | 11  | 12  | 14  | 10  | 11  |
| Cyp        | 20AJ21       | J1         | 14                   | 16  | 14   | 17   | 23  | 10  | 11  | 12  | 14  | 10  | 11  |
| Cyp        | 22AJ21       | J1         | 14                   | 16  | 14   | 17   | 23  | 10  | 11  | 12  | 14  | 10  | 11  |
| Cyp        | 25AJ21       | J1         | 14                   | 16  | 14   | 17   | 23  | 10  | 11  | 12  | 14  | 10  | 11  |
| Cyp        | 5AJ191       | J1         | 14                   | 15  | 13   | 16   | 23  | 10  | 11  | 12  | 14  | 10  | 12  |
| Cyp        | 2AJ19        | J2         | 14                   | 16  | 13   | 16   | 23  | 10  | 11  | 12  | 14  | 9   | 12  |
| Cyp        | 6AJ19        | J2         | 14                   | 14  | 13   | 16   | 25  | 10  | 11  | 12  | 16  | 9   | 12  |
| Cyp        | 9AJ19        | J2         | 14                   | 14  | 13   | 16   | 25  | 10  | 11  | 12  | 16  | 9   | 12  |
| Cyp        | 12AJ19       | J2         | 15                   | 16  | 13   | 16   | 24  | 10  | 11  | 12  | 15  | 9   | 13  |

*AJHG*, Volume 83

| Population | DNA Ref. No. | Haplogroup | Allele Status at DYS |     |      |      |     |     |     |     |     |     |     |
|------------|--------------|------------|----------------------|-----|------|------|-----|-----|-----|-----|-----|-----|-----|
|            |              |            | 19                   | 388 | 389I | 389b | 390 | 391 | 392 | 393 | 437 | 438 | 439 |
| Cyp        | 16AJ19       | J2         | 14                   | 14  | 13   | 16   | 25  | 10  | 11  | 12  | 16  | 9   | 12  |
| Cyp        | 21AJ19       | J2         | 14                   | 14  | 13   | 16   | 25  | 10  | 11  | 12  | 16  | 9   | 12  |
| Cyp        | 28AJ19       | J2         | 14                   | 16  | 13   | 16   | 23  | 10  | 11  | 12  | 14  | 9   | 12  |
| Cyp        | 4AJ21        | J2         | 14                   | 14  | 13   | 16   | 25  | 10  | 11  | 12  | 16  | 9   | 12  |
| Cyp        | 10AJ21       | J2         | 14                   | 14  | 13   | 16   | 25  | 10  | 11  | 12  | 16  | 9   | 12  |
| Cyp        | 14AJ21       | J2         | 14                   | 14  | 13   | 16   | 25  | 11  | 11  | 12  | 16  | 9   | 12  |
| Cyp        | 15AJ21       | J2         | 14                   | 14  | 13   | 16   | 25  | 11  | 11  | 12  | 16  | 9   | 12  |
| Cyp        | 18AJ21       | J2         | 14                   | 14  | 13   | 16   | 25  | 10  | 11  | 12  | 16  | 9   | 12  |
| Cyp        | 27AJ21       | J2         | 14                   | 14  | 14   | 17   | 21  | 10  | 11  | 12  | 14  | 10  | 11  |
| Cyp        | 13AJ19       | J2/-f1     | 14                   | 15  | 13   | 18   | 23  | 10  | 11  | 12  | 15  | 9   | 11  |
| Cyp        | 230594       | K/M/O      | 14                   | 12  | 14   | 16   | 23  | 10  | 13  | 14  | 14  | 9   | 11  |
| Cyp        | 225085       | L          | 14                   | 12  | 14   | 16   | 23  | 10  | 14  | 12  | 16  | 10  | 11  |
| Cyp        | 212254       | L          | 15                   | 12  | 13   | 17   | 23  | 10  | 13  | 14  | 14  | 9   | 11  |
| Cyp        | 218863       | L          | 14                   | 12  | 13   | 16   | 23  | 10  | 11  | 12  | 14  | 9   | 12  |
| Cyp        | CYP 01       | P/Q        | 14                   | 11  | 13   | 16   | 25  | 10  | 17  | 13  | 14  | 11  | 12  |
| Cyp        | 223597       | R1b        | -                    | -   | -    | -    | -   | -   | -   | -   | -   | -   | -   |
| Cyp        | 225529       | R1b        | 14                   | 12  | 13   | 17   | 24  | 10  | 13  | 12  | 15  | 13  | 11  |
| Cyp        | 223010       | R1b        | 14                   | 12  | 13   | 16   | 23  | 11  | 14  | 12  | 15  | 12  | 13  |
| Cyp        | 223308       | R1b        | 14                   | 12  | 13   | 16   | 24  | 11  | 14  | 12  | 15  | 12  | 13  |
| Cyp        | 224000       | R1b        | 15                   | 12  | 13   | 17   | 24  | 10  | 13  | 13  | 15  | 12  | 11  |
| Cyp        | 236197       | R1b        | 14                   | 12  | 13   | 16   | 23  | 10  | 14  | 12  | 15  | 12  | 12  |
| Cyp        | 236442       | R1b        | 14                   | 12  | 13   | 16   | 23  | 10  | 13  | 12  | 14  | 12  | 12  |
| Cyp        | 216773       | R1b        | 14                   | 12  | 12   | 18   | 22  | 11  | 13  | 12  | 15  | 12  | 12  |
| Cyp        | 216837       | R1b        | 14                   | 12  | 14   | 16   | 24  | 10  | 13  | 12  | 15  | 12  | 13  |
| Cyp        | CYP 04       | R1b        | 14                   | 12  | 13   | 16   | 23  | 10  | 13  | 12  | 14  | 12  | 12  |
| Cyp        | CYP 05       | R1b        | 14                   | 12  | 13   | 18   | 24  | 11  | 12  | 12  | 15  | 12  | 13  |
| Cyp        | CYP 09       | R1b        | 15                   | 13  | 13   | 17   | 24  | 10  | 13  | 13  | 15  | 11  | 12  |
| Cyp        | CYP 10       | R1b        | 14                   | 12  | 13   | 16   | 23  | 11  | 13  | 12  | 14  | 12  | 12  |
| Cyp        | CYP 15       | R1b        | 15                   | 13  | 13   | 18   | 25  | 10  | 13  | 13  | 16  | 11  | 11  |
| Cyp        | CYP 16       | R1a1       | 16                   | 12  | 13   | 17   | 25  | 10  | 11  | 13  | 14  | 11  | 11  |
| Cyp        | CYP 21       | R1b        | 14                   | 12  | 14   | 16   | 24  | 11  | 14  | 12  | 15  | 12  | 12  |







*AJHG*, Volume 83

| Population | DNA Ref. No. | Haplogroup | Allele Status at DYS |     |      |      |     |     |     |     |     |     |     |
|------------|--------------|------------|----------------------|-----|------|------|-----|-----|-----|-----|-----|-----|-----|
|            |              |            | 19                   | 388 | 389I | 389b | 390 | 391 | 392 | 393 | 437 | 438 | 439 |
| Mal        | 4H20D        | I          | -                    | -   | -    | -    | -   | -   | -   | -   | -   | -   | -   |
| Mal        | 5H20C        | I          | -                    | -   | -    | -    | -   | -   | -   | -   | -   | -   | -   |
| Mal        | 5H25A        | I          | -                    | -   | -    | -    | -   | -   | -   | -   | -   | -   | -   |
| Mal        | 5H25C        | I          | -                    | -   | -    | -    | -   | -   | -   | -   | -   | -   | -   |
| Mal        | 3H29A        | I          | -                    | -   | -    | -    | -   | -   | -   | -   | -   | -   | -   |
| Mal        | 3H29B        | I          | -                    | -   | -    | -    | -   | -   | -   | -   | -   | -   | -   |
| Mal        | 1D169 A      | J2         | 13                   | 15  | 13   | 17   | 23  | 10  | 11  | 12  | 15  | 9   | 11  |
| Mal        | 1D169 B      | J2         | 13                   | 13  | 12   | 17   | 22  | 11  | 11  | 12  | 15  | 10  | 11  |
| Mal        | 1D169 C      | J2         | 13                   | 15  | 12   | 16   | 24  | 10  | 11  | 12  | 16  | 10  | 12  |
| Mal        | 1D175 A      | J2         | 13                   | 15  | 13   | 17   | 23  | 10  | 11  | 12  | 15  | 9   | 11  |
| Mal        | 2D175 A      | J2         | 13                   | 15  | 13   | 18   | 22  | 11  | 11  | 14  | 14  | 9   | 12  |
| Mal        | 2D181 B      | J2         | 13                   | 15  | 13   | 16   | 24  | 9   | 11  | 12  | 14  | 9   | 12  |
| Mal        | 3D183 B      | J2         | 13                   | 15  | 13   | 17   | 23  | 10  | 11  | 12  | 15  | 9   | 11  |
| Mal        | 1D185B       | J2         | 12                   | 14  | 13   | 16   | 24  | 10  | 11  | 12  | 14  | 9   | 11  |
| Mal        | 1D185C       | J2         | 12                   | 14  | 13   | 16   | 24  | 10  | 11  | 12  | 14  | 9   | 11  |
| Mal        | 1D185D       | J2         | 13                   | 15  | 13   | 17   | 23  | 10  | 11  | 12  | 15  | 9   | 11  |
| Mal        | 2D185B       | J2         | 14                   | 15  | 14   | 17   | 23  | 10  | 11  | 13  | 15  | 9   | 11  |
| Mal        | 2D185D       | J2         | 13                   | 14  | 14   | 16   | 22  | 10  | 13  | 14  | 14  | 10  | 10  |
| Mal        | 4D185C       | J2         | -                    | -   | -    | -    | -   | -   | -   | -   | -   | -   | -   |
| Mal        | 5D185B       | J2         | 12                   | 15  | 13   | 16   | 20  | 10  | 11  | 12  | 15  | 9   | 11  |
| Mal        | 1D190A       | J2         | 13                   | 15  | 13   | 17   | 22  | 11  | 11  | 13  | 14  | 9   | 12  |
| Mal        | 1D190C       | J2         | 13                   | 17  | 14   | 18   | 23  | 10  | 11  | 12  | 15  | 9   | 11  |
| Mal        | 2D190C       | J2         | 12                   | 15  | 13   | 16   | 23  | 10  | 11  | 12  | 16  | 9   | 12  |
| Mal        | 3D190B       | J2         | 13                   | 15  | 14   | 17   | 23  | 10  | 11  | 12  | 15  | 9   | 11  |
| Mal        | 3D190C       | J2         | 13                   | 15  | 13   | 16   | 24  | 10  | 11  | 12  | 15  | 8   | 11  |
| Mal        | 4D190B       | J2         | 13                   | 16  | 13   | 16   | 24  | 9   | 11  | 12  | 14  | 9   | 12  |
| Mal        | 4D190D       | J2         | 13                   | 15  | 13   | 17   | 23  | 10  | 11  | 12  | 15  | 9   | 11  |
| Mal        | 1D193B       | J2         | -                    | -   | -    | -    | -   | -   | -   | -   | -   | -   | -   |
| Mal        | 1D193C       | J2         | 12                   | 15  | 13   | 17   | 23  | 10  | 11  | 12  | 15  | 9   | 11  |
| Mal        | 1D196A       | J2         | 13                   | 15  | 13   | 16   | 22  | 11  | 11  | 13  | 14  | 9   | 13  |
| Mal        | 1D196B       | J2         | 13                   | 12  | 13   | 18   | 22  | 9   | 11  | 14  | 16  | 10  | 12  |







*AJHG*, Volume 83

| Population | DNA Ref. No. | Haplogroup | Allele Status at DYS |     |      |      |     |     |     |     |     |     |     |   |
|------------|--------------|------------|----------------------|-----|------|------|-----|-----|-----|-----|-----|-----|-----|---|
|            |              |            | 19                   | 388 | 389I | 389b | 390 | 391 | 392 | 393 | 437 | 438 | 439 |   |
| Mal        | 3D190A       | R1a1       | -                    | -   | -    | -    | -   | -   | -   | -   | -   | -   | -   | - |
| Mal        | 2D193A       | R1a1       | -                    | -   | -    | -    | -   | -   | -   | -   | -   | -   | -   | - |
| Mal        | 3D193C       | R1a1       | -                    | -   | -    | -    | -   | -   | -   | -   | -   | -   | -   | - |
| Mal        | 2H20C        | R1a1       | -                    | -   | -    | -    | -   | -   | -   | -   | -   | -   | -   | - |
| Mal        | 3H20C        | R1a1       | -                    | -   | -    | -    | -   | -   | -   | -   | -   | -   | -   | - |
| Mal        | 4H25D        | R1a1       | -                    | -   | -    | -    | -   | -   | -   | -   | -   | -   | -   | - |
| Mal        | 4H29C        | R1a1       | -                    | -   | -    | -    | -   | -   | -   | -   | -   | -   | -   | - |
| Tun        | DN45         | E3b        | -                    | -   | -    | -    | -   | -   | -   | -   | -   | -   | -   | - |
| Tun        | D10          | E3b        | 13                   | 13  | 13   | 18   | 23  | 10  | 11  | 13  | 14  | 11  | 13  |   |
| Tun        | D15          | E3b        | -                    | -   | -    | -    | -   | -   | -   | -   | -   | -   | -   | - |
| Tun        | D16          | E3b        | 13                   | 12  | 14   | 16   | 24  | 9   | 11  | 13  | 14  | 10  | 10  |   |
| Tun        | D26          | E3b        | 14                   | 12  | 14   | 16   | 24  | 9   | 11  | 13  | 14  | 10  | 10  |   |
| Tun        | D46          | E3b        | 13                   | 12  | 13   | 16   | 24  | 9   | 11  | 13  | 14  | 10  | 10  |   |
| Tun        | D69          | E3b        | 13                   | 12  | 14   | 16   | 24  | 10  | 11  | 13  | 14  | 10  | 11  |   |
| Tun        | D71          |            | 17                   | 12  | 13   |      | 21  | 10  | 11  | 14  | 14  | 11  | 11  |   |
| Tun        | D72          | E3b        | 14                   | 12  | 14   | 17   | 24  | 9   | 11  | 13  | 14  | 10  | 10  |   |
| Tun        | DN2          | E3b        | 13                   | 12  | 14   | 16   | 24  | 9   | 11  | 13  | 14  | 10  | 10  |   |
| Tun        | DN23         | E3b        | 13                   | 12  | 14   | 16   | 24  | 9   | 11  | 13  | 14  | 10  | 10  |   |
| Tun        | DN24         | E3b        | 13                   | 12  | 14   | 16   | 24  | 9   | 11  | 13  | 14  | 10  | 10  |   |
| Tun        | DN25         | E3b        | 13                   | 12  | 14   | 16   | 25  | 10  | 11  | 13  | 14  | 10  | 11  |   |
| Tun        | DN44         | E3b        | 13                   | 12  | 14   | 16   | 25  | 9   | 11  | 13  | 14  | 10  | 10  |   |
| Tun        | DN54         | E3b        | 13                   | 12  | 14   | 16   | 24  | 9   | 11  | 13  | 14  | 10  | 10  |   |
| Tun        | DN8          | E3b        | 13                   | 12  | 14   | 17   | 25  | 9   | 11  | 13  | 14  | 10  | 10  |   |
| Tun        | DN9          | E3b        | 14                   | 12  | 14   | 17   | 25  | 9   | 11  | 13  | 14  | 10  | 10  |   |
| Tun        | T11          | E3b        | -                    | -   | -    | -    | -   | -   | -   | -   | -   | -   | -   | - |
| Tun        | T20          | E3b        | 14                   | 12  | 13   | 17   | 24  | 9   | 11  | 12  | 14  | 10  | 10  |   |
| Tun        | T22          | E3b        | 13                   | 12  | 14   | 16   | 24  | 9   | 11  | 13  | 14  | 10  | 10  |   |
| Tun        | T23          | E3b        | 13                   | 12  | 14   | 16   | 25  | 9   | 11  | 12  | 14  | 10  | 10  |   |
| Tun        | T26          | E3b        | -                    | -   | -    | -    | -   | -   | -   | -   | -   | -   | -   | - |
| Tun        | T27          | E3b        | 13                   | 12  | 14   | 16   | 23  | 9   | 11  | 13  | 14  | 10  | 10  |   |





*AJHG, Volume 83*

| Population | DNA Ref. No. | Haplogroup   | Allele Status at DYS |     |      |      |     |     |     |     |     |     |     |
|------------|--------------|--------------|----------------------|-----|------|------|-----|-----|-----|-----|-----|-----|-----|
|            |              |              | 19                   | 388 | 389I | 389b | 390 | 391 | 392 | 393 | 437 | 438 | 439 |
| <b>Tun</b> | DN56         | J2           | -                    | -   | -    | -    | -   | -   | -   | -   | -   | -   | -   |
| <b>Tun</b> | DN76         | J2           | -                    | -   | -    | -    | -   | -   | -   | -   | -   | -   | -   |
| <b>Tun</b> | T41          | J2           | -                    | -   | -    | -    | -   | -   | -   | -   | -   | -   | -   |
| <b>Tun</b> | TN18         | J2           | -                    | -   | -    | -    | -   | -   | -   | -   | -   | -   | -   |
| <b>Tun</b> | D41          |              | 15                   | 12  | 15   | 17   | 24  | 11  | 13  | 13  | 14  | 12  | 12  |
| <b>Tun</b> | D47          |              | 14                   | 12  | 13   | 16   | 23  | 10  | 13  | 13  | 14  | 13  | 12  |
| <b>Tun</b> | T21          |              | 13                   | 12  | 14   | 17   | 24  | 11  | 13  | 14  | 15  | 12  | 12  |
| <b>Tun</b> | TN28         |              | 13                   | 12  | 14   | 17   | 24  | 11  | 13  | 13  | 15  | 12  | 12  |
| <b>Tun</b> | TN4          |              | 15                   | 12  | 13   | 18   | 25  | 10  | 11  | 13  | 14  | 11  | 10  |
| <b>Tun</b> | TN33         |              | 16                   | 12  | 14   | 16   | 24  | 10  | 12  | 13  | 14  | 11  | 13  |
| <b>Tun</b> | TN34         |              | 15                   | 12  | 14   | 16   | 24  | 10  | 12  | 14  | 14  | 11  | 13  |
| <b>Tun</b> | TN50         |              | 15                   | 12  | 13   | 18   | 25  | 10  | 13  | 13  | 14  | 12  | 13  |
| <b>Tun</b> | TN71         |              | 16                   | 12  | 14   | 16   | 23  | 10  | 12  | 14  | 14  | 11  | 12  |
| <b>Tun</b> | T1           | K2           | -                    | -   | -    | -    | -   | -   | -   | -   | -   | -   | -   |
| <b>Tun</b> | T3           | K2           | -                    | -   | -    | -    | -   | -   | -   | -   | -   | -   | -   |
| <b>Tun</b> | T31          | K2           | -                    | -   | -    | -    | -   | -   | -   | -   | -   | -   | -   |
| <b>Tun</b> | TN3          | K2           | 14                   | 12  | 13   | 17   | 23  | 9   | 14  | 13  | 14  | 9   | 13  |
| <b>Tun</b> | TN25         | K2           | 14                   | 12  | 15   | 15   | 23  | 10  | 13  | 13  | 15  | 9   | 10  |
| <b>Tun</b> | TN70         | K2           | 15                   | -   | 14   | 16   | 23  | 11  | 13  | 13  | 14  | 9   | 11  |
| <b>Mor</b> | A1           | E (xE3bxE3a) | 14                   | 12  | 12   | 17   | 23  | 10  | 11  | 13  | 17  | 10  | 8   |
| <b>Mor</b> | A2           | E3b (xE3b3)  | 13                   | 12  | 14   | 16   | 24  | 9   | 11  | 13  | 14  | 10  | 10  |
| <b>Mor</b> | A3           | E3b (xE3b3)  | 13                   | 12  | 14   | 16   | 24  | 9   | 11  | 13  | 14  | 10  | 10  |
| <b>Mor</b> | A4           | E3b (xE3b3)  | 13                   | 12  | 14   | 16   | 24  | 9   | 11  | 13  | 14  | 10  | 10  |
| <b>Mor</b> | A5           | E3b (xE3b3)  | 13                   | 12  | 14   | 16   | 25  | 9   | 11  | 13  | 14  | 10  | 10  |
| <b>Mor</b> | A6           | E3b (xE3b3)  | 13                   | 12  | 15   | 17   | 24  | 9   | 11  | 13  | 14  | 10  | 11  |
| <b>Mor</b> | A7           | E3b (xE3b3)  | 13                   | 12  | 14   | 16   | 24  | 9   | 11  | 13  | 14  | 9   | 10  |
| <b>Mor</b> | A8           | E3b (xE3b3)  | 13                   | 12  | 14   | 16   | 23  | 9   | 11  | 13  | 14  | 10  | 10  |
| <b>Mor</b> | A9           | E3b (xE3b3)  | 13                   | -   | 13   | 18   | 22  | 9   | 11  | 13  | 14  | 10  | 10  |
| <b>Mor</b> | A10          | R (xR1)      | 15                   | -   | 12   | 16   | 21  | 10  | 11  | 13  | 15  | 10  | 11  |
| <b>Mor</b> | A11          | E3b (xE3b3)  | 13                   | -   | 14   | 16   | 24  | 9   | 11  | 13  | 14  | 10  | 10  |

*AJHG*, Volume 83

| Population | DNA Ref. No. | Haplogroup   | Allele Status at DYS |     |      |      |     |     |     |     |     |     |     |
|------------|--------------|--------------|----------------------|-----|------|------|-----|-----|-----|-----|-----|-----|-----|
|            |              |              | 19                   | 388 | 389I | 389b | 390 | 391 | 392 | 393 | 437 | 438 | 439 |
| <b>Mor</b> | A12          | E3b (xE3b3)  | 13                   | –   | 14   | 16   | 24  | 9   | 11  | 14  | 14  | 10  | 10  |
| <b>Mor</b> | A13          | E3b (xE3b3)  | 13                   | –   | 14   | 16   | 24  | 9   | 11  | 13  | 14  | 10  | 10  |
| <b>Mor</b> | A14          | E3b (xE3b3)  | 13                   | –   | 14   | 16   | 24  | 9   | 11  | 14  | 14  | 11  | 10  |
| <b>Mor</b> | A15          | E3b (xE3b3)  | 13                   | –   | 14   | 16   | 24  | 9   | 11  | 13  | 14  | 10  | 10  |
| <b>Mor</b> | A16          | E3b (xE3b3)  | 13                   |     | 14   | 16   | 24  | 9   | 11  | 13  | 14  | 10  | 11  |
| <b>Mor</b> | A17          | E3b (xE3b3)  | 13                   | –   | 12   | 17   | 24  | 9   | 11  | 13  | 14  | 10  | 11  |
| <b>Mor</b> | A18          | E3b (xE3b3)  | 13                   | –   | 13   | 16   | 24  | 9   | 11  | 13  | 14  | 10  | 10  |
| <b>Mor</b> | A20          | E3b (xE3b3)  | 13                   | –   | 13   | 17   | 24  | 9   | 11  | 13  | 14  | 10  | 11  |
| <b>Mor</b> | A21          | E3a          | 16                   | –   | 13   | 18   | 21  | 10  | 11  | 14  | 14  | 11  | 12  |
| <b>Mor</b> | A22          |              | 15                   | –   | 12   | 15   | 24  | 10  | 14  | 13  | 14  | 9   | 11  |
| <b>Mor</b> | A23          | E3b (xE3b3)  | 13                   | –   | 14   | 16   | 23  | 9   | 11  | 13  | 14  | 10  | 10  |
| <b>Mor</b> | A24          | E3a          | 15                   | –   | 12   | 17   | 21  | 10  | 11  | 14  | 14  | 11  | 12  |
| <b>Mor</b> | A25          | R1           | 14                   | –   | 13   | 16   | 23  | 11  | 13  | 13  | 15  | 12  | 12  |
| <b>Mor</b> | A26          | E3b (xE3b3)  | 13                   | –   | 13   | 16   | 24  | 9   | 11  | 13  | 14  | 10  | 11  |
| <b>Mor</b> | A27          | E3b (xE3b3)  | 13                   | –   | 13   | 17   | 24  | 9   | 11  | 13  | 14  | 10  | 11  |
| <b>Mor</b> | A28          | E3b (xE3b3)  | 13                   | –   | 14   | 16   | 24  | 9   | 11  | 13  | 14  | 10  | 10  |
| <b>Mor</b> | A29          | E3b (xE3b3)  | 13                   | –   | 14   | 16   | 24  | 9   | 11  | 14  | 14  | 10  | 10  |
| <b>Mor</b> | A31          | E3b (xE3b3)  | 13                   | –   | 12   | 17   | 22  | 10  | 11  | 13  | 14  | 10  | 10  |
| <b>Mor</b> | A32          | E3b (xE3b3)  | 13                   | –   | 14   | 16   | 24  | 9   | 11  | 13  | 14  | 10  | 10  |
| <b>Mor</b> | A33          | E3b (xE3b3)  | 13                   | –   | 12   | 17   | 24  | 10  | 10  | 13  | 14  | 10  | 10  |
| <b>Mor</b> | A34          | E3b (xE3b3)  | 13                   | –   | 14   | 16   | 24  | 9   | 11  | 13  | 14  | 10  | 10  |
| <b>Mor</b> | A35          |              | 13                   | –   | 14   | 16   | 23  | 9   | 11  | 13  | 14  | 10  | 10  |
| <b>Mor</b> | A36          | E3b (xE3b3)  | 13                   | –   | 13   | 18   | 22  | 9   | 11  | 13  | 14  | 10  | 14  |
| <b>Mor</b> | A37          | E3b (xE3b3)  | 13                   | –   | 14   | 16   | 24  | 9   | 11  | 13  | 14  | 10  | 11  |
| <b>Mor</b> | A38          | E3b (xE3b3)  | 13                   | –   | 15   | 17   | 23  | 9   | 11  | 13  | 14  | 10  | 10  |
| <b>Mor</b> | A39          | E3b (xE3b3)  | 13                   | –   | 14   | 17   | 24  | 9   | 11  | 13  | 14  | 10  | 10  |
| <b>Mor</b> | A40          | E3b (xE3b3)  | 13                   | –   | 14   | 16   | 24  | 9   | 11  | 13  | 14  | 10  | 10  |
| <b>Mor</b> | As1          | E (xE3bxE3a) | 14                   | –   | 13   | 16   | 23  | 10  | 11  | 12  | 14  | 9   | 12  |
| <b>Mor</b> | AS2          | R1           | 14                   | –   | 13   | 16   | 23  | 10  | 11  | 12  | 14  | 9   | –   |
| <b>Mor</b> | AS3          | E3b (xE3b3)  | 13                   | 12  | 13   | 17   | 24  | 9   | 11  | 12  | 14  | 10  | 10  |
| <b>Mor</b> | AS4          | E3b (xE3b3)  | 14                   | 12  | 13   | 17   | 23  | 10  | 11  | 12  | 14  | 10  | 10  |

*AJHG*, Volume 83

| Population | DNA Ref. No. | Haplogroup  | Allele Status at DYS |     |      |      |     |     |     |     |     |     |     |
|------------|--------------|-------------|----------------------|-----|------|------|-----|-----|-----|-----|-----|-----|-----|
|            |              |             | 19                   | 388 | 389I | 389b | 390 | 391 | 392 | 393 | 437 | 438 | 439 |
| <b>Mor</b> | AS5          | E3b (xE3b3) | 13                   | 12  | 13   | 17   | 24  | 9   | 11  | 14  | 14  | 10  | 10  |
| <b>Mor</b> | AS6          | E3b (xE3b3) | 13                   | 12  | 13   | 17   | 23  | 9   | 11  | 12  | 14  | 10  | 10  |
| <b>Mor</b> | AS7          | E3b (xE3b3) | 13                   | 12  | 13   | 17   | 23  | 10  | 11  | 12  | 14  | 9   | _   |
| <b>Mor</b> | AS8          | E3b (xE3b3) | 14                   | 12  | 13   | 16   | 23  | 10  | 11  | 12  | 14  | 9   | 10  |
| <b>Mor</b> | AS9          | E3a         | 14                   | 12  | 13   | 16   | 23  | 10  | 11  | 12  | 14  | 9   | 12  |
| <b>Mor</b> | AS10         | R1          | 14                   | _   | 13   | 16   | 23  | 10  | 13  | 12  | 14  | 12  | 12  |
| <b>Mor</b> | AS11         | E3b (xE3b3) | 13                   | 12  | 13   | 17   | 24  | 9   | 11  | 13  | 14  | 10  | 10  |
| <b>Mor</b> | AS12         | E3b (xE3b3) | 13                   | 13  | 13   | 16   | 24  | 10  | 11  | 12  | 14  | 10  | 10  |
| <b>Mor</b> | AS13         | E3b (xE3b3) | 13                   | 12  | 13   | 16   | 23  | 10  | 11  | 12  | 14  | 9   | 12  |
| <b>Mor</b> | AS14         | E3b (xE3b3) | 13                   | 12  | 14   | 16   | 23  | 9   | 11  | 13  | 14  | 10  | 10  |
| <b>Mor</b> | AS15         | E3b (xE3b3) | 13                   | 12  | 13   | 17   | 23  | 9   | 11  | 12  | 14  | 10  | 10  |
| <b>Mor</b> | AS16         | E3b (xE3b3) | 14                   | 12  | 13   | 16   | 23  | 10  | 11  | 12  | 14  | 9   | 12  |
| <b>Mor</b> | AS17         | E3a         | 15                   | 12  | 13   | 17   | 21  | 10  | 11  | 14  | 14  | 11  | 11  |
| <b>Mor</b> | AS18         | E3b (xE3b3) | 13                   | 12  | 13   | 17   | 22  | 9   | 11  | 12  | 14  | 10  | 10  |
| <b>Mor</b> | AS19         | E3b (xE3b3) | 13                   | 12  | 13   | 16   | 24  | 9   | 11  | 12  | 14  | 10  | _   |
| <b>Mor</b> | AS20         | E3b (xE3b3) | 14                   | _   | 13   | 16   | 23  | 10  | 11  | 12  | 14  | 9   | _   |
| <b>Mor</b> | AS21         | E           | 16                   | 12  | 12   | 17   | 22  | 10  | 11  | 13  | 17  | 8   | 11  |
| <b>Mor</b> | AS22         |             | 17                   | _   | 13   | 14   | 23  | 10  | 14  | 13  | 14  | 10  | 11  |
| <b>Mor</b> | AS23         | E3a         | 16                   | 12  | 13   | 18   | 21  | 10  | 11  | 14  | 14  | 11  | 12  |
| <b>Mor</b> | AS24         | E3b (xE3b3) | 13                   | 12  | 13   | 17   | 22  | 9   | 11  | 12  | 14  | 10  | 10  |
| <b>Mor</b> | AS25         | R           | 14                   | _   | 13   | 16   | 23  | 11  | 13  | 13  | 15  | 12  | 12  |
| <b>Mor</b> | AS26         | E3b (xE3b3) | 14                   | 12  | 13   | 16   | 23  | 10  | 11  | 12  | 14  | 9   | _   |
| <b>Mor</b> | AS27         | E3b (xE3b3) | 14                   | 12  | 13   | 17   | 23  | 9   | 11  | 13  | 14  | 10  | 10  |
| <b>Mor</b> | AS28         | E3b (xE3b3) | 13                   | 12  | 13   | 16   | 23  | 9   | 11  | 13  | 14  | 10  | 10  |
| <b>Mor</b> | AS29         | E3b (xE3b3) | 13                   | 12  | 13   | 16   | 23  | 9   | 11  | 13  | 14  | 10  | 10  |
| <b>Mor</b> | AS30         | R1          | 14                   | _   | 13   | 16   | 23  | 10  | 11  | 12  | 14  | 10  | 11  |
| <b>Mor</b> | AS31         | R1          | 14                   | _   | 13   | 16   | 23  | 10  | 11  | 12  | 14  | 9   | 12  |
| <b>Mor</b> | AS32         | E3b (xE3b3) | 13                   | 12  | 14   | 16   | 24  | 9   | 11  | 13  | 14  | 10  | 10  |
| <b>Mor</b> | AS33         | E3b (xE3b3) | _                    | _   | _    | _    | _   | _   | _   | _   | _   | _   | _   |
| <b>Mor</b> | AS34         | E3b (xE3b3) | 13                   | 12  | 13   | 17   | 23  | 9   | 11  | 13  | 14  | 10  | 10  |
| <b>Mor</b> | AS35         | E3b (xE3b3) | 14                   | _   | 13   | 16   | 23  | 10  | 11  | 12  | 14  | 10  | 10  |

*AJHG*, Volume 83

| Population | DNA Ref. No. | Haplogroup   | Allele Status at DYS |     |      |      |     |     |     |     |     |     |     |
|------------|--------------|--------------|----------------------|-----|------|------|-----|-----|-----|-----|-----|-----|-----|
|            |              |              | 19                   | 388 | 389I | 389b | 390 | 391 | 392 | 393 | 437 | 438 | 439 |
| <b>Mor</b> | AS36         | E3a          | 15                   | 12  | 13   | 19   | 21  | 10  | 10  | 13  | 14  | 11  | 12  |
| <b>Mor</b> | AS37         | E3b (xE3b3)  | 13                   | 12  | 14   | 16   | 24  | 9   | 11  | 13  | 14  | 10  | 10  |
| <b>Mor</b> | AS38         | R1           | 14                   | _   | 13   | 16   | 23  | 10  | 11  | 12  | 15  | 12  | 11  |
| <b>Mor</b> | AS39         | R1           | 14                   | _   | 13   | 16   | 23  | 10  | 11  | 12  | 14  | 9   | 11  |
| <b>Mor</b> | AS40         | E3b (xE3b3)  | 13                   | 12  | 14   | 17   | 25  | 9   | 11  | 13  | 14  | 10  | 11  |
| <b>Mor</b> | AS41         | E3b (xE3b3)  | 13                   | 12  | 14   | 16   | 24  | 9   | 11  | 13  | 14  | 10  | 10  |
| <b>Mor</b> | AS42         | E3b (xE3b3)  | 13                   | 12  | 13   | 17   | 24  | 9   | 11  | 13  | 14  | 10  | 10  |
| <b>Mor</b> | AS43         | E3b (xE3b3)  | 13                   | 12  | 13   | 19   | 23  | 9   | 11  | 13  | 14  | 10  | 13  |
| <b>Mor</b> | AS44         | E3b (xE3b3)  | 13                   | 12  | 14   | 16   | 24  | 9   | 11  | 13  | 14  | 10  | 10  |
| <b>Mor</b> | AS45         | E3b (xE3b3)  | 13                   | 12  | 14   | 16   | 24  | 9   | 11  | 13  | 14  | 10  | 10  |
| <b>Mor</b> | AS46         | E3a          | 15                   | 12  | 13   | 18   | 21  | 10  | 11  | 13  | 14  | 11  | 14  |
| <b>Mor</b> | AS47         | E3b (xE3b3)  | 13                   | 12  | 14   | 17   | 25  | 9   | 11  | 13  | 14  | 10  | 10  |
| <b>Mor</b> | AS48         | E3b (xE3b3)  | 13                   | 12  | 14   | 17   | 25  | 9   | 11  | 13  | 14  | 10  | 10  |
| <b>Mor</b> | AS49         | R1           | 14                   | _   | 13   | 16   | 23  | 11  | 13  | 13  | 15  | 12  | 12  |
| <b>Mor</b> | AS50         | R1           | 14                   | _   | 13   | 16   | 23  | 10  | 11  | 12  | 14  | 9   | 12  |
| <b>Mor</b> | AS51         | R1           | 14                   | _   | 13   | 17   | 23  | 11  | 13  | 12  | 14  | 9   | 11  |
| <b>Mor</b> | AS52         | R1           | 14                   | _   | 13   | 16   | 23  | 11  | 11  | 12  | 15  | 12  | 11  |
| <b>Mor</b> | AS53         | R1           | 14                   | _   | 13   | 16   | 23  | 10  | 11  | 12  | 14  | 9   | 12  |
| <b>Mor</b> | AS54         | E3b (xE3b3)  | 14                   | _   | 13   | 16   | 23  | 10  | 11  | 12  | 14  | 9   | 11  |
| <b>Mor</b> | AS55         | J1           | 14                   | _   | 13   | 17   | 23  | 11  | 11  | 13  | 14  | 10  | 11  |
| <b>Mor</b> | AS56         | E3b (xE3b3)  | 14                   | _   | 13   | 17   | 23  | 11  | 11  | 13  | 14  | 10  | 11  |
| <b>Mor</b> | AS57         | E3b (xE3b3)  | 13                   | 12  | 12   | 19   | 23  | 9   | 11  | 12  | 14  | 10  | 10  |
| <b>Mor</b> | AS58         | G            | 13                   | 12  | 15   | 16   | 24  | 9   | 11  | 13  | 14  | 10  | 10  |
| <b>Mor</b> | AS59         |              | 15                   | _   | 12   | 17   | 22  | 10  | 11  | 14  | 16  | 10  | 12  |
| <b>Mor</b> | AS60         | E3b (xE3b3)  | 14                   | _   | 13   | 16   | 23  | 10  | 11  | 12  | 14  | 9   | 12  |
| <b>Mor</b> | AS61         | E3b (xE3b3)  | 13                   | 12  | 13   | 17   | 23  | 9   | 11  | 14  | 14  | 10  | 10  |
| <b>Mor</b> | AS62         | E3b (xE3b3)  | 13                   | 12  | 13   | 16   | 23  | 9   | 11  | 13  | 14  | 10  | 10  |
| <b>Mor</b> | AS63         | E3b (xE3b3)  | 13                   | 12  | 13   | 16   | 23  | 9   | 11  | 13  | 14  | 10  | 10  |
| <b>Mor</b> | AS64         | E3b (xE3b3)  | 13                   | 12  | 14   | 16   | 23  | 9   | 11  | 13  | 14  | 10  | 10  |
| <b>Mor</b> | AS65         | E3b (xE3b3)  | 13                   | 12  | 14   | 17   | 23  | 9   | 11  | 13  | 14  | 10  | 10  |
| <b>Mor</b> | AS66         | E (xE3bxE3a) | 13                   | 12  | 13   | 16   | 23  | 9   | 11  | 13  | 14  | 10  | 10  |

*AJHG*, Volume 83

| Population | DNA Ref. No. | Haplogroup  | Allele Status at DYS |     |      |      |     |     |     |     |     |     |     |
|------------|--------------|-------------|----------------------|-----|------|------|-----|-----|-----|-----|-----|-----|-----|
|            |              |             | 19                   | 388 | 389I | 389b | 390 | 391 | 392 | 393 | 437 | 438 | 439 |
| <b>Mor</b> | AS67         | E3b (xE3b3) | 16                   | 12  | 12   | 17   | 22  | 10  | 11  | 13  | 17  | 8   | 11  |
| <b>Mor</b> | AS68         | J1          | 13                   | 12  | 14   | 17   | 24  | 9   | 11  | 13  | 14  | 10  | 10  |
| <b>Mor</b> | AS69         | E3b (xE3b3) | 14                   | _   | 12   | 17   | 23  | 11  | 11  | 12  | 14  | 10  | 11  |
| <b>Mor</b> | AS70         | E3b (xE3b3) | 13                   | 12  | 14   | 16   | 23  | 9   | 11  | 13  | 14  | 10  | 10  |
| <b>Mor</b> | AS71         | E3b (xE3b3) | 13                   | 12  | 14   | 16   | 23  | 9   | 11  | 13  | 14  | 10  | 11  |
| <b>Mor</b> | AS72         | E3b (xE3b3) | 14                   | 12  | 14   | 16   | 24  | 9   | 11  | 13  | 14  | 10  | 10  |
| <b>Mor</b> | C2           | E3b (xE3b3) | 13                   | _   | 14   | 16   | 24  | 9   | 11  | 13  | 14  | 10  | 10  |
| <b>Mor</b> | C6           | E3b (xE3b3) | 13                   | _   | 14   | 16   | 25  | 9   | 11  | 13  | 14  | 10  | 10  |
| <b>Mor</b> | C8           | E3b (xE3b3) | 14                   | _   | 13   | 17   | 22  | 9   | 11  | 13  | 14  | 10  | 12  |
| <b>Mor</b> | C10          | E3b         | 13                   | _   | 14   | 16   | 25  | 9   | 11  | 13  | 14  | 10  | 10  |
| <b>Mor</b> | C12          | E3b         | _                    | _   | _    | _    | _   | _   | _   | _   | _   | _   | _   |
| <b>Mor</b> | C17          | E3b (xE3b3) | 13                   | _   | 14   | 16   | 23  | 9   | 11  | 13  | 14  | 10  | 10  |
| <b>Mor</b> | C20          | E3b (xE3b3) | 13                   | _   | 14   | 16   | 25  | 9   | 11  | 13  | 14  | 10  | 10  |
| <b>Mor</b> | C21          | E3b (xE3b3) | 13                   | _   | 14   | 16   | 24  | 9   | 11  | 13  | 14  | 10  | 10  |
| <b>Mor</b> | C29          | E3b (xE3b3) | 13                   | _   | 14   | 16   | 23  | 9   | 11  | 13  | 14  | 10  | 10  |
| <b>Mor</b> | C31          | J1          | _                    | _   | _    | _    | _   | _   | _   | _   | _   | _   | _   |
| <b>Mor</b> | C32          | E3b (xE3b3) | 13                   | _   | 12   | 17   | 27  | 10  | 11  | 13  | 14  | 10  | 11  |
| <b>Mor</b> | C34          | E3b (xE3b3) | 13                   | _   | 14   | 18   | 24  | 10  | 11  | 12  | 14  | 10  | 12  |
| <b>Mor</b> | C35          | E3b (xE3b3) | 13                   | _   | 14   | 16   | 24  | 9   | 11  | 13  | 14  | 10  | 10  |
| <b>Mor</b> | C36          |             | 15                   | _   | 14   | 17   | 22  | 9   | 11  | 13  | 16  | 10  | 11  |
| <b>Mor</b> | C37          | E3b (xE3b3) | 13                   | _   | 14   | 16   | 23  | 9   | 11  | 13  | 14  | 10  | 10  |
| <b>Mor</b> | C40          | E3b (xE3b3) | 13                   | _   | 14   | 16   | 24  | 9   | 11  | 13  | 14  | 10  | 10  |
| <b>Mor</b> | C41          | E3b (xE3b3) | 13                   | _   | 14   | 16   | 25  | 9   | 11  | 13  | 14  | 10  | 10  |
| <b>Mor</b> | C42          | E3b (xE3b3) | 13                   | _   | 14   | 16   | 24  | 9   | 11  | 13  | 14  | 10  | 10  |
| <b>Mor</b> | C45          | E3b (xE3b3) | 13                   | _   | 14   | 16   | 24  | 9   | 11  | 13  | 14  | 10  | 10  |
| <b>Mor</b> | C46          | E3b (xE3b3) | 15                   | _   | 13   | 18   | 23  | 11  | 11  | 13  | 14  | 10  | 11  |
| <b>Mor</b> | C47          | E3b (xE3b3) | 13                   | _   | 14   | 16   | 24  | 9   | 11  | 13  | 14  | 10  | 10  |
| <b>Mor</b> | C57          | E3b (xE3b3) | 13                   | _   | 14   | 16   | 23  | 9   | 11  | 13  | 14  | 10  | 10  |
| <b>Mor</b> | C58          | E3b (xE3b3) | 13                   | _   | 14   | 16   | 24  | 9   | 11  | 13  | 14  | 10  | 10  |
| <b>Mor</b> | C59          | E3b (xE3b3) | 13                   | _   | 13   | 18   | 22  | 9   | 11  | 13  | 14  | 10  | 13  |
| <b>Mor</b> | C60          | E3b (xE3b3) | 13                   | _   | 14   | 16   | 23  | 9   | 11  | 13  | 14  | 10  | 10  |

*AJHG*, Volume 83

| Population | DNA Ref. No. | Haplogroup   | Allele Status at DYS |     |      |      |     |     |     |     |     |     |     |
|------------|--------------|--------------|----------------------|-----|------|------|-----|-----|-----|-----|-----|-----|-----|
|            |              |              | 19                   | 388 | 389I | 389b | 390 | 391 | 392 | 393 | 437 | 438 | 439 |
| <b>Mor</b> | C61          | E3a          | 17                   | –   | 14   | 17   | 21  | 10  | 11  | 13  | 14  | 11  | 11  |
| <b>Mor</b> | C62          | E3b (xE3b3)  | 13                   | –   | 14   | 16   | 25  | 9   | 11  | 13  | 14  | 11  | 12  |
| <b>Mor</b> | H1           | E3b (xE3b3)  | 13                   | –   | 14   | 16   | 24  | 9   | 11  | 13  | 14  | 11  | 10  |
| <b>Mor</b> | H5           | E3b (xE3b3)  | 13                   | –   | 14   | 16   | 24  | 9   | 11  | 13  | 14  | 10  | 10  |
| <b>Mor</b> | H6           | E3b (xE3b3)  | 13                   | –   | 14   | 16   | 24  | 9   | 11  | 13  | 14  | 10  | 10  |
| <b>Mor</b> | H7           | E3b (xE3b3)  | 13                   | –   | 14   | 16   | 24  | 9   | 11  | 13  | 14  | 10  | 11  |
| <b>Mor</b> | H10          | E3b (xE3b3)  | 13                   | –   | 13   | 16   | 24  | 10  | 11  | 13  | 14  | 10  | 12  |
| <b>Mor</b> | H11          | E3b (xE3b3)  | 13                   | –   | 14   | 18   | 24  | 9   | 11  | 13  | 14  | 10  | 10  |
| <b>Mor</b> | H12          | E3b (xE3b3)  | 13                   | –   | 13   | 18   | 22  | 9   | 12  | 13  | 14  | 10  | 14  |
| <b>Mor</b> | H13          | E3b (xE3b3)  | 13                   | –   | 14   | 16   | 24  | 9   | 11  | 13  | 14  | 10  | 10  |
| <b>Mor</b> | H14          | J2           | 14                   | –   | 12   | 17   | 23  | 10  | 11  | 12  | 15  | 9   | 11  |
| <b>Mor</b> | H15          | E (xE3bxE3a) | 16                   | –   | 12   | 17   | 22  | 11  | 11  | 13  | 17  | 8   | 11  |
| <b>Mor</b> | H16          | E3b (xE3b3)  | 13                   | –   | 14   | 16   | 24  | 9   | 11  | 13  | 14  | 10  | 12  |
| <b>Mor</b> | H17          | E3b (xE3b3)  | 13                   | –   | 14   | 16   | 23  | 9   | 11  | 14  | 14  | 10  | 10  |
| <b>Mor</b> | H18          | E3b (xE3b3)  | 13                   | –   | 14   | 16   | 24  | 9   | 11  | 14  | 14  | 10  | 10  |
| <b>Mor</b> | H20          |              | 17                   | –   | 13   | 17   | 21  | 10  | 11  | 14  | 14  | 11  | 12  |
| <b>Mor</b> | H21          | E3b (xE3b3)  | 13                   | –   | 13   | 16   | 25  | 9   | 11  | 13  | 14  | 9   | 10  |
| <b>Mor</b> | H22          | E3b (xE3b3)  | 13                   | –   | 13   | 17   | 24  | 10  | 11  | 14  | 14  | 10  | 12  |
| <b>Mor</b> | H23          | E3b (xE3b3)  | 13                   | –   | 14   | 16   | 23  | 9   | 11  | 13  | 14  | 10  | 11  |
| <b>Mor</b> | H25          | E3b (xE3b3)  | 13                   | –   | 14   | 16   | 24  | 9   | 11  | 13  | 14  | 10  | 11  |
| <b>Mor</b> | H26          | E3b (xE3b3)  | 13                   | –   | 15   | 16   | 24  | 9   | 11  | 13  | 14  | 10  | 10  |
| <b>Mor</b> | H27          | E3b (xE3b3)  | 13                   | –   | 14   | 16   | 24  | 9   | 11  | 13  | 14  | 10  | 10  |
| <b>Mor</b> | H28          | E3b (xE3b3)  | 14                   | –   | 14   | 16   | 24  | 9   | 11  | 13  | 14  | 10  | 10  |
| <b>Mor</b> | H29          | E3b (xE3b3)  | 13                   | –   | 14   | 17   | 24  | 9   | 11  | 13  | 14  | 10  | 10  |
| <b>Mor</b> | H30          | E (xE3bxE3a) | 14                   | –   | 13   | 17   | 23  | 11  | 11  | 12  | 14  | 10  | 10  |
| <b>Mor</b> | O2           | E3b (xE3b3)  | 13                   | 12  | 14   | 16   | 24  | 9   | 11  | 13  | 14  | 10  | 10  |
| <b>Mor</b> | O3           | E3b (xE3b3)  | 13                   | 13  | 14   | 17   | 24  | 9   | 11  | 13  | 14  | 10  | 10  |
| <b>Mor</b> | O4           | E3b (xE3b3)  | 13                   | 12  | 14   | 16   | 24  | 9   | 11  | 13  | 14  | 10  | 10  |
| <b>Mor</b> | O5           | J1           | 15                   | –   | 13   | 17   | 23  | 11  | 11  | 12  | 14  | 10  | 11  |
| <b>Mor</b> | O6           | E3b (xE3b3)  | 13                   | 12  | 14   | 16   | 24  | 9   | 11  | 13  | 14  | 10  | 10  |
| <b>Mor</b> | O9           | E3a          | 16                   | 12  | 13   | 19   | 21  | 9   | 11  | 13  | 14  | 11  | 11  |

*AJHG*, Volume 83

| Population | DNA Ref. No. | Haplogroup   | Allele Status at DYS |     |      |      |     |     |     |     |     |     |     |
|------------|--------------|--------------|----------------------|-----|------|------|-----|-----|-----|-----|-----|-----|-----|
|            |              |              | 19                   | 388 | 389I | 389b | 390 | 391 | 392 | 393 | 437 | 438 | 439 |
| <b>Mor</b> | O10          | E3b (xE3b3)  | 13                   | 12  | 14   | 16   | 23  | 9   | 11  | 13  | 14  | 10  | 10  |
| <b>Mor</b> | O11          | E3b (xE3b3)  | 13                   | 13  | 14   | 16   | 24  | 9   | 11  | 13  | 14  | 10  | 10  |
| <b>Mor</b> | O12          | E (xE3b)     | 15                   | _   | 13   | 18   | 21  | 10  | 11  | 14  | 14  | 11  | 12  |
| <b>Mor</b> | O13          | J1           | 14                   | _   | 13   | 17   | 23  | 12  | 11  | 12  | 14  | 10  | 11  |
| <b>Mor</b> | O17          | E3a          | 17                   | 12  | 14   | 17   | 21  | 10  | 11  | 13  | 14  | 11  | 11  |
| <b>Mor</b> | O21          | E3b (xE3b3)  | 13                   | 12  | 15   | 16   | 25  | 8   | 11  | 13  | 14  | 10  | 10  |
| <b>Mor</b> | O22          | E3b (xE3b3)  | 13                   | 13  | 14   | 16   | 24  | 9   | 11  | 13  | 14  | 10  | 10  |
| <b>Mor</b> | O23          | E3b (xE3b3)  | 13                   | 13  | 14   | 16   | 24  | 9   | 11  | 13  | 14  | 10  | 12  |
| <b>Mor</b> | O24          | E3b (xE3b3)  | 13                   | 12  | 14   | 16   | 24  | 9   | 11  | 13  | 14  | 10  | 10  |
| <b>Mor</b> | O25          | E3b (xE3b3)  | 13                   | 12  | 14   | 16   | 24  | 9   | 11  | 13  | 14  | 10  | 10  |
| <b>Mor</b> | O26          | E3b (xE3b3)  | 13                   | 13  | 14   | 16   | 24  | 9   | 11  | 13  | 14  | 8   | 9   |
| <b>Mor</b> | O27          | E3b (xE3b3)  | 13                   | 12  | 14   | 16   | 25  | 9   | 11  | 12  | 14  | 10  | 10  |
| <b>Mor</b> | O29          | E3b (xE3b3)  | 13                   | 13  | 14   | 18   | 24  | 9   | 11  | 13  | 14  | 10  | 10  |
| <b>Mor</b> | O30          | E3b (xE3b3)  | 13                   | 12  | 13   | 17   | 24  | 10  | 11  | 12  | 14  | 10  | 11  |
| <b>Mor</b> | O33          | E3b (xE3b3)  | 13                   | 12  | 14   | 16   | 24  | 9   | 11  | 13  | 14  | 10  | 10  |
| <b>Mor</b> | O34          | E3b (xE3b3)  | 13                   | 12  | 13   | 16   | 24  | 9   | 11  | 13  | 14  | 10  | 10  |
| <b>Mor</b> | O35          | E3b (xE3b3)  | 13                   | 12  | 14   | 17   | 24  | 9   | 11  | 13  | 14  | 10  | 10  |
| <b>Mor</b> | Tz1          | J1           | 13                   | _   | 13   | 17   | 23  | 8   | 11  | 12  | 14  | 10  | 11  |
| <b>Mor</b> | Tz2          | E            | 13                   | _   | 14   | 16   | 24  | 9   | 11  | 13  | 14  | 10  | 10  |
| <b>Mor</b> | Tz3          | E3b (xE3b3)  | 13                   | _   | 13   | 16   | 25  | 9   | 11  | 13  | 14  | 10  | 12  |
| <b>Mor</b> | Tz4          | E3b (xE3b3)  | 13                   | _   | 14   | 16   | 23  | 9   | 11  | 13  | 14  | 10  | 10  |
| <b>Mor</b> | Tz5          | E            | 13                   | _   | 13   | 19   | 22  | 9   | 11  | 13  | 14  | 10  | 14  |
| <b>Mor</b> | Tz7          | E            | 13                   | _   | 13   | 19   | 22  | 8   | 11  | 12  | 14  | 10  | 12  |
| <b>Mor</b> | Tz8          | E (xE3bxE3a) | 14                   | _   | 12   | 16   | 25  | 10  | 11  | 13  | 15  | 11  | 12  |
| <b>Mor</b> | Tz9          | E            | 13                   | _   | 12   | 16   | 24  | 9   | 11  | 13  | 14  | 10  | 11  |
| <b>Mor</b> | Tz10         | E            | 13                   | _   | 13   | 19   | 22  | 8   | 11  | 12  | 14  | 10  | 12  |
| <b>Mor</b> | Tz11         | E3b (xE3b3)  | 13                   | _   | 13   | 16   | 25  | 9   | 11  | 13  | 14  | 10  | 12  |
| <b>Mor</b> | Tz12         | E3b (xE3b3)  | 13                   | _   | 14   | 16   | 24  | 9   | 11  | 13  | 14  | 10  | 10  |
| <b>Mor</b> | Tz13         | E3b (xE3b3)  | 13                   | _   | 14   | 16   | 23  | 9   | 11  | 13  | 14  | 10  | 10  |
| <b>Mor</b> | Tz14         | E3b (xE3b3)  | 13                   | _   | 14   | 16   | 24  | 9   | 11  | 13  | 14  | 10  | 11  |
| <b>Mor</b> | Tz15         | E            | 13                   | _   | 14   | 16   | 23  | 9   | 11  | 13  | 14  | 10  | 10  |

*AJHG*, Volume 83

| Population | DNA Ref. No. | Haplogroup   | Allele Status at DYS |     |      |      |     |     |     |     |     |     |     |
|------------|--------------|--------------|----------------------|-----|------|------|-----|-----|-----|-----|-----|-----|-----|
|            |              |              | 19                   | 388 | 389I | 389b | 390 | 391 | 392 | 393 | 437 | 438 | 439 |
| <b>Mor</b> | Tz16         | E            | 14                   | –   | 14   | 16   | 23  | 9   | 11  | 13  | 14  | 10  | 10  |
| <b>Mor</b> | Tz17         | E3b (xE3b3)  | 14                   | –   | 14   | 16   | 23  | 9   | 11  | 13  | 14  | 10  | 10  |
| <b>Mor</b> | Tz18         | E            | 11                   | –   | 14   | 16   | 24  | 9   | 11  | 13  | 14  | 10  | 10  |
| <b>Mor</b> | Tz19         | E3b (xE3b3)  | 13                   | –   | 14   | 16   | 24  | 9   | 11  | 13  | 14  | 10  | 10  |
| <b>Mor</b> | Tz21         | E3b (xE3b3)  | 13                   | –   | 14   | 16   | 23  | 9   | 11  | 13  | 14  | 10  | 10  |
| <b>Mor</b> | Tz22         | E3b (xE3b3)  | 13                   | –   | 14   | 16   | 23  | 9   | 11  | 13  | 14  | 10  | 10  |
| <b>Mor</b> | Tz28         | E            | 14                   | –   | 13   | 17   | 23  | 11  | 11  | 12  | 14  | 10  | 11  |
| <b>Mor</b> | Tz29         | J1           | 13                   | –   | 14   | 16   | 24  | 9   | 11  | 13  | 14  | 10  | 10  |
| <b>Mor</b> | Tz30         | E            | 14                   | –   | 13   | 18   | 23  | 10  | 11  | 12  | 14  | 10  | 11  |
| <b>Mor</b> | Tz31         | E3b (xE3b3)  | 13                   | –   | 13   | 18   | 22  | 9   | 11  | 13  | 14  | 10  | 13  |
| <b>Mor</b> | Tz32         | E3b (xE3b3)  | 13                   | –   | 14   | 16   | 23  | 9   | 11  | 13  | 14  | 10  | 10  |
| <b>Mor</b> | Tz33         | E3b (xE3b3)  | 13                   | –   | 14   | 16   | 23  | 9   | 11  | 13  | 14  | 10  | 10  |
| <b>Mor</b> | Tz34         | E3b (xE3b3)  | 13                   | –   | 14   | 16   | 24  | 9   | 11  | 13  | 14  | 10  | 10  |
| <b>Mor</b> | Tz35         | E3b (xE3b3)  | 13                   | –   | 14   | 16   | 24  | 9   | 11  | 13  | 14  | 10  | 10  |
| <b>Mor</b> | Tz36         | E3b (xE3b3)  | 13                   | –   | 13   | 18   | 22  | 9   | 11  | 14  | 14  | 10  | 13  |
| <b>Mor</b> | Tz37         | E3b (xE3b3)  | 13                   | –   | 13   | 16   | 23  | 9   | 11  | 13  | 14  | 10  | 10  |
| <b>Mor</b> | Tz38         | E3b (xE3b3)  | 13                   | –   | 14   | 16   | 24  | 9   | 11  | 13  | 14  | 10  | 10  |
| <b>Mor</b> | Tz39         | E3b (xE3b3)  | 13                   | –   | 14   | 16   | 24  | 9   | 11  | 13  | 14  | 10  | 10  |
| <b>Mor</b> | Tz41         | E3b          | 14                   | –   | 14   | 16   | 24  | 9   | 11  | 13  | 14  | 10  | 12  |
| <b>Mor</b> | Tz42         | E3b (xE3b3)  | 13                   | –   | 15   | 16   | 23  | 9   | 11  | 13  | 14  | 10  | 10  |
| <b>Mor</b> | Tz43         | J1           | 13                   | –   | 15   | 16   | 23  | 9   | 11  | 13  | 14  | 10  | 10  |
| <b>Mor</b> | Tz44         | E3b (xE3b3)  | 14                   | –   | 13   | 17   | 23  | 11  | 11  | 12  | 14  | 10  | 11  |
| <b>Mor</b> | Tz45         | E (xE3bxE3a) | 13                   | –   | 12   | 17   | 23  | 10  | 11  | 13  | 14  | 10  | 10  |
| <b>Mor</b> | Tz46         | J1           | 17                   | –   | 14   | 18   | 22  | 10  | 11  | 13  | 17  | 8   | 13  |
| <b>Mor</b> | Tz49         |              | 15                   | –   | 13   | 17   | 23  | 11  | 9   | 12  | 14  | 10  | 12  |
| <b>Mor</b> | Tz50         |              | 14                   | –   | 13   | 17   | 23  | 12  | 11  | 12  | 14  | 10  | 11  |
| <b>Mor</b> | Tz54         |              | 13                   | –   | 14   | 16   | 24  | 9   | 11  | 14  | 14  | 10  | 10  |
| <b>Mor</b> | Tz56         |              | 13                   | –   | 14   | 16   | 24  | 9   | 11  | 13  | 14  | 10  | 10  |
| <b>Mor</b> | Tz59         |              | 15                   | –   | 13   | 18   | 21  | 11  | 11  | 13  | 14  | 11  | 11  |
| <b>Mor</b> | Tz61         |              | 11                   | –   | 14   | 16   | 24  | 9   | 11  | 13  | 14  | 10  | 10  |
| <b>Mor</b> | Tz63         |              | 13                   | –   | 14   | 17   | 24  | 9   | 11  | 13  | 14  | 10  | 11  |











Table S2. Additional Population Data Used in this Study and Their Sources

| Study                                         | Country                 | Number of Samples |
|-----------------------------------------------|-------------------------|-------------------|
| Zalloua et al. 2008 <sup>1</sup>              | Lebanon                 | 935               |
| Capelli et al. 2006 <sup>2</sup>              | Cyprus                  | 65                |
| Cinnioglu et al. 2004 <sup>3</sup>            | South Turkey            | 33                |
| Cinnioglu et al. 2004 <sup>3</sup>            | North Turkey            | 112               |
| Martinez et al. 2007 <sup>4</sup>             | Crete (Lasithi Plateau) | 40                |
| Martinez et al. 2007 <sup>4</sup>             | Crete (rest)            | 127               |
| King et al. 2008 <sup>5</sup>                 | Crete                   | 69                |
| Firasat et al. 2007 <sup>6</sup>              | Greece                  | 77                |
| Robino et al. 2004 <sup>7</sup>               | Greece                  | 105               |
| Semino et al. 2000 <sup>8</sup>               | Greece                  | 78                |
| YHRD_Eurasian MP_EuropeanMP_2003 <sup>9</sup> | Greece, Athens          | 100               |
| King et al. 2008 <sup>5</sup>                 | Greece, south           | 46                |
| King et al. 2008 <sup>5</sup>                 | Greece, north           | 96                |
| Ghiani et al. 2004 <sup>10</sup>              | Sicily                  | 19                |
| Robino et al. 2006 <sup>7</sup>               | Sicily                  | 413               |
| Capelli et al. 2006 <sup>2</sup>              | W Sicily                | 125               |
| Capelli et al. 2006 <sup>2</sup>              | E Sicily                | 87                |
| Capelli et al. 2006 <sup>2</sup>              | S. Italy                | 68                |
| Capelli et al. 2007 <sup>11</sup>             | Italy WCL               | 57                |
| Capelli et al. 2007 <sup>11</sup>             | Italy NWA               | 46                |
| Capelli et al. 2007 <sup>11</sup>             | Italy WCP               | 84                |
| Capelli et al. 2007 <sup>11</sup>             | Italy CMA               | 59                |
| Capelli et al. 2007 <sup>11</sup>             | Italy SLA               | 51                |
| Capelli et al. 2007 <sup>11</sup>             | Italy NEL               | 55                |
| Capelli et al. 2007 <sup>11</sup>             | Italy TLB               | 79                |
| Capelli et al. 2007 <sup>11</sup>             | Italy ELB               | 95                |
| Francalacci et al. 2003 <sup>12</sup>         | Corsica                 | 34                |
| Ghiani et. al, 2002 <sup>13</sup>             | Sardinia                | 3                 |
| Capelli et al. 2006 <sup>2</sup>              | Sardinia                | 81                |

| <b>Study</b>                                  | <b>Country</b>         | <b>Number of Samples</b> |
|-----------------------------------------------|------------------------|--------------------------|
| Semino et al. 2004 <sup>14</sup>              | Sardinia               | 144                      |
| Contu et al. 2008 <sup>15</sup>               | S. Sardinia            | 187                      |
| Contu et al. 2008 <sup>15</sup>               | N Sardinia             | 86                       |
| Martin et al. 2004 <sup>16</sup>              | Spain                  | 42                       |
| Jimenez et al. 2001 <sup>17</sup>             | Spain (Valencia)       | 139                      |
| Adams et al. unpublished                      | Spain (Valencia)       | 73                       |
| YHRD_Eurasian MP_EuropeanMP_2003 <sup>9</sup> | Spain (Catalans)       | 223                      |
| Adams et al., unpublished                     | Spain (Catalans)       | 80                       |
| Quintana-Murci et al. 2003 <sup>18</sup>      | S. Spain               | 162                      |
| Adams et al. unpublished                      | S. Spain (E Andalusia) | 95                       |
| Adams et al. unpublished                      | S. Spain (W Andalusia) | 72                       |
| Flores et al. 2004 <sup>19</sup>              | Galicia                | 19                       |
| Flores et al. 2004 <sup>19</sup>              | Leon                   | 60                       |
| Flores et al. 2004 <sup>19</sup>              | Cantabria              | 70                       |
| Adams et al. unpublished                      | Minorca N              | 37                       |
| Adams et al. unpublished                      | Majorca                | 62                       |
| Adams et al. unpublished                      | Ibiza                  | 54                       |
| Gonzalez-Neira et al. 2000 <sup>20</sup>      | Iberia                 | 20                       |
| Gonzalez-Neira et al. 2000 <sup>20</sup>      | Portugal               | 294                      |
| Goncalves et al. 2005 <sup>21</sup>           | Portugal, south        | 100                      |
| Goncalves et al. 2005 <sup>21</sup>           | Portugal, north        | 101                      |
| Cherni et al 2005 <sup>22</sup>               | Tunisia                | 246                      |
| Semino et al. 2000 <sup>8</sup>               | Albania                | 51                       |
| Maryanovic 2005 <sup>21</sup>                 | Serbia                 | 81                       |
| Maryanovic 2005 <sup>21</sup>                 | Croatia                | 90                       |
| Arredi et al. 2004 <sup>23</sup>              | Egypt, south           | 29                       |
| Arredi et al. 2004 <sup>23</sup>              | Egypt, north           | 43                       |
| <b>Total Samples</b>                          |                        | <b>5899</b>              |

Table S3. Haplogroup Numbers and Frequencies

| Site Populations             | E3b   | G     | I     | J*(x)J2 | J2    | K2    | L     | R1a   | R1b   | Total |
|------------------------------|-------|-------|-------|---------|-------|-------|-------|-------|-------|-------|
| <b>Phoenician Test Sites</b> |       |       |       |         |       |       |       |       |       |       |
| Phoenician Heartland         | 88    | 22    | 32    | 96      | 156   | 25    | 41    | 14    | 49    | 558   |
|                              | 0.16  | 0.04  | 0.06  | 0.17    | 0.28  | 0.05  | 0.07  | 0.03  | 0.09  | 1.00  |
| Phoenician Periphery         | 112   | 46    | 21    | 191     | 155   | 22    | 20    | 25    | 33    | 700   |
|                              | 0.20  | 0.07  | 0.03  | 0.27    | 0.22  | 0.03  | 0.03  | 0.04  | 0.05  | 1.00  |
| Phoenician Homeland          | 200   | 68    | 53    | 187     | 311   | 47    | 61    | 39    | 82    | 1258  |
|                              | 0.16  | 0.05  | 0.04  | 0.23    | 0.25  | 0.04  | 0.05  | 0.03  | 0.07  | 1.00  |
| Non-Phoenician Levant        | 58    | 19    | 9     | 83      | 41    | 7     | 2     | 3     | 6     | 286   |
|                              | 0.20  | 0.07  | 0.03  | 0.29    | 0.14  | 0.02  | 0.01  | 0.01  | 0.02  | 1.00  |
| Cyprus                       | 13    | 0     | 5     | 4       | 24    | 3     | 0     | 2     | 6     | 65    |
|                              | 0.20  | 0.00  | 0.08  | 0.06    | 0.37  | 0.05  | 0.00  | 0.03  | 0.09  | 1.00  |
| S. Turkey                    | 4     | 3     | 1     | 5       | 8     | 1     | 0     | 3     | 7     | 33    |
|                              | 0.12  | 0.09  | 0.03  | 0.15    | 0.24  | 0.03  | 0.00  | 0.09  | 0.21  | 1.0   |
| N. Turkey                    | 8     | 16    | 5     | 10      | 24    | 2     | 10    | 4     | 20    | 112   |
|                              | 0.07  | 0.14  | 0.04  | 0.09    | 0.21  | 0.02  | 0.09  | 0.04  | 0.18  | 1.00  |
| Lowland Crete                | 14    | 9     | 13    | 2       | 59    | 5     | 0     | 10    | 15    | 127   |
|                              | 0.11  | 0.07  | 0.10  | 0.02    | 0.46  | 0.04  | 0.00  | 0.08  | 0.12  | 1.00  |
| Lasithi Plateau Crete        | 2     | 3     | 3     | 1       | 4     | 3     | 0     | 8     | 15    | 40    |
|                              | 0.05  | 0.08  | 0.08  | 0.03    | 0.10  | 0.08  | 0.00  | 0.20  | 0.38  | 1.00  |
| Crete (Total)                | 16    | 12    | 16    | 3       | 63    | 8     | 0     | 18    | 30    | 167   |
|                              | 0.10  | 0.07  | 0.10  | 0.02    | 0.38  | 0.05  | 0.0   | 0.11  | 0.18  | 1.00  |
| Greece                       | 16    | 7     | 15    | 1       | 12    | 2     | 0     | 12    | 9     | 77    |
|                              | 0.21  | 0.09  | 0.19  | 0.01    | 0.16  | 0.03  | 0.00  | 0.16  | 0.12  | 1.00  |
| Greece & Crete               | 32    | 19    | 31    | 4       | 75    | 10    | 0     | 30    | 39    | 244   |
|                              | 0.131 | 0.119 | 0.127 | 0.016   | 0.307 | 0.041 | 0.000 | 0.123 | 0.160 | 1.000 |
| Malta                        | 12    | 17    | 17    | 0       | 59    | 0     | 0     | 10    | 41    | 187   |
|                              | 0.06  | 0.09  | 0.09  | 0.00    | 0.32  | 0.00  | 0.00  | 0.05  | 0.22  | 1.00  |
| W.Sicily                     | 24    | 16    | 14    | 5       | 23    | 4     | 0     | 3     | 34    | 125   |
|                              | 0.19  | 0.13  | 0.11  | 0.04    | 0.18  | 0.03  | 0.00  | 0.024 | 0.27  | 1.00  |

*AJHG, Volume 83*

| Site Populations   | E3b   | G     | I     | J*(x)2 | J2    | K2    | L     | R1a   | R1b   | Total |
|--------------------|-------|-------|-------|--------|-------|-------|-------|-------|-------|-------|
| E. Sicily          | 25    | 4     | 4     | 6      | 25    | 4     | 0     | 2     | 17    | 87    |
|                    | 0.29  | 0.05  | 0.05  | 0.07   | 0.29  | 0.05  | 0.00  | 0.023 | 0.20  | 1.00  |
| Sicily (Total)     | 49    | 20    | 18    | 11     | 48    | 8     | 0     | 5     | 51    | 221   |
|                    | 0.23  | 0.09  | 0.08  | 0.05   | 0.23  | 0.04  | 0.00  | 0.02  | 0.24  | 1.00  |
| S. Italy           | 18    | 10    | 4     | 3      | 11    | 2     | 0     | 2     | 17    | 68    |
|                    | 0.26  | 0.15  | 0.06  | 0.04   | 0.16  | 0.03  | 0.00  | 0.03  | 0.20  | 1.00  |
| S. Sardinia        | 20    | 26    | 65    | 5      | 20    | 0     | 0     | 1     | 36    | 187   |
|                    | 0.11  | 0.14  | 0.35  | 0.03   | 0.11  | 0.00  | 0.00  | 0.01  | 0.19  | 1.00  |
| N. Sardinia        | 11    | 18    | 24    | 0      | 6     | 0     | 0     | 0     | 17    | 86    |
|                    | 0.13  | 0.21  | 0.28  | 0.00   | 0.07  | 0.00  | 0.00  | 0.00  | 0.20  | 1.00  |
| Sardinia           | 31    | 44    | 89    | 5      | 26    | 0     | 0     | 1     | 53    | 273   |
|                    | 0.114 | 0.161 | 0.326 | 0.018  | 0.095 | 0.000 | 0.000 | 0.004 | 0.194 | 1.000 |
| Mallorca           | 4     | 4     | 5     | 1      | 5     | 1     | 0     | 0     | 41    | 62    |
|                    | 0.062 | 0.062 | 0.081 | 0.016  | 0.081 | 0.016 | 0.000 | 0.000 | 0.661 | 1.000 |
| Minorca            | 7     | 0     | 1     | 0      | 1     | 0     | 0     | 1     | 27    | 37    |
|                    | 0.189 | 0.000 | 0.027 | 0.000  | 0.027 | 0.000 | 0.000 | 0.027 | 0.730 | 1.000 |
| Malorca + Minorca  | 11    | 4     | 6     | 1      | 6     | 1     | 0     | 1     | 68    | 99    |
|                    | 0.111 | 0.040 | 0.060 | 0.010  | 0.060 | 0.010 | 0.000 | 0.010 | 0.687 | 1.000 |
| Ibiza              | 4     | 7     | 1     | 0      | 2     | 9     | 0     | 0     | 31    | 54    |
|                    | 0.074 | 0.130 | 0.019 | 0.000  | 0.037 | 0.167 | 0.000 | 0.000 | 0.574 | 1.000 |
| S. Spain           | 15    | 6     | 10    | 4      | 18    | 0     | 0     | 4     | 108   | 167   |
|                    | 0.09  | 0.04  | 0.06  | 0.02   | 0.11  | 0.00  | 0.00  | 0.02  | 0.65  | 1.00  |
| Valencia Spain     | 8     | 1     | 7     | 2      | 4     | 1     | 0     | 2     | 47    | 73    |
|                    | 0.11  | 0.01  | 0.10  | 0.03   | 0.05  | 0.01  | 0.00  | 0.03  | 0.64  | 1.00  |
| Contact Spain      | 23    | 7     | 17    | 6      | 22    | 1     | 0     | 6     | 155   | 240   |
|                    | 0.10  | 0.03  | 0.07  | 0.03   | 0.09  | 0.00  | 0.00  | 0.03  | 0.65  | 1.00  |
| Non-contact Iberia | 47    | 25    | 21    | 13     | 26    | 0     | 0     | 4     | 233   | 383   |
|                    | 0.12  | 0.07  | 0.05  | 0.03   | 0.07  | 0.00  | 0.00  | 0.01  | 0.61  | 1.00  |
| Coastal Tunisia    | 14    | 0     | 0     | 0      | 5     | 1     | 0     | 0     | 1     | 36    |
|                    | 0.39  | 0.00  | 0.00  | 0.00   | 0.14  | 0.03  | 0.00  | 0.00  | 0.03  | 1.00  |



*AJHG, Volume 83*

| Site Populations            | E3b   | G     | I     | J*(x)2 | J2    | K2    | L     | R1a   | R1b   | Total |
|-----------------------------|-------|-------|-------|--------|-------|-------|-------|-------|-------|-------|
| Non-contact Tunisia         | 46    | 0     | 0     | 0      | 0     | 5     | 0     | 1     | 8     | 94    |
|                             | 0.49  | 0.00  | 0.00  | 0.00   | 0.00  | 0.05  | 0.00  | 0.01  | 0.09  | 1.00  |
| <b>Neolithic Test Sites</b> |       |       |       |        |       |       |       |       |       |       |
| Turkey #5                   | 4     | 6     | 2     | 3      | 11    | 2     | 0     | 5     | 6     | 43    |
|                             | 0.093 | 0.14  | 0.047 | 0.07   | 0.256 | 0.047 | 0.000 | 0.116 | 0.14  | 1.000 |
| Turkey #3                   | 7     | 13    | 2     | 8      | 16    | 2     | 10    | 4     | 11    | 83    |
|                             | 0.084 | 0.157 | 0.024 | 0.096  | 0.193 | 0.024 | 0.12  | 0.048 | 0.133 | 1.000 |
| Turkey #8                   | 2     | 6     | 2     | 1      | 4     | 1     | 1     | 1     | 6     | 30    |
|                             | 0.067 | 0.2   | 0.067 | 0.033  | 0.133 | 0.033 | 0.033 | 0.033 | 0.2   | 1.000 |
| Turkey #1                   | 8     | 2     | 6     | 8      | 16    | 0     | 1     | 2     | 7     | 52    |
|                             | 0.154 | 0.038 | 0.155 | 0.154  | 0.308 | 0.000 | 0.019 | 0.038 | 0.135 | 1.000 |
| Turkey #2                   | 1     | 3     | 3     | 2      | 8     | 0     | 0     | 0     | 9     | 29    |
|                             | 0.034 | 0.103 | 0.103 | 0.069  | 0.276 | 0.000 | 0.000 | 0.000 | 0.310 | 1.000 |
| Turkey #4                   | 12    | 7     | 0     | 10     | 23    | 1     | 3     | 9     | 11    | 82    |
|                             | 0.146 | 0.085 | 0.000 | 0.122  | 0.280 | 0.012 | 0.037 | 0.110 | 0.134 | 1.000 |
| Turkey #6                   | 4     | 3     | 1     | 5      | 8     | 1     | 0     | 3     | 7     | 33    |
|                             | 0.121 | 0.091 | 0.030 | 0.152  | 0.242 | 0.030 | 0.000 | 0.091 | 0.212 | 1.000 |
| Turkey #7                   | 8     | 11    | 4     | 5      | 26    | 3     | 3     | 5     | 14    | 90    |
|                             | 0.089 | 0.122 | 0.044 | 0.056  | 0.289 | 0.033 | 0.033 | 0.056 | 0.156 | 1.000 |
| Turkey #9                   | 10    | 6     | 8     | 6      | 16    | 3     | 4     | 7     | 12    | 81    |
|                             | 0.123 | 0.074 | 0.099 | 0.074  | 0.198 | 0.037 | 0.049 | 0.086 | 0.148 | 1.000 |
| Greece                      | 17    | 2     | 6     | 1      | 16    | 1     | 1     | 9     | 21    | 78    |
|                             | 0.218 | 0.026 | 0.077 | 0.013  | 0.205 | 0.013 | 0.013 | 0.115 | 0.269 | 1.000 |
| Albania                     | 11    | 1     | 10    | 2      | 12    | 0     | 0     | 5     | 9     | 51    |
|                             | 0.216 | 0.02  | 0.196 | 0.039  | 0.235 | 0.000 | 0.000 | 0.098 | 0.176 | 1.000 |
| Serbia                      | 18    | 1     | 29    | 0      | 7     | 0     | 0     | 11    | 5     | 81    |
|                             | 0.222 | 0.012 | 0.358 | 0.000  | 0.086 | 0.000 | 0.000 | 0.136 | 0.062 | 1.000 |
| Croatia                     | 8     | 1     | 66    | 0      | 1     | 0     | 0     | 11    | 2     | 90    |
|                             | 0.089 | 0.011 | 0.733 | 0.000  | 0.011 | 0.000 | 0.000 | 0.122 | 0.022 | 1.000 |
| Italy WCL                   | 9     | 6     | 1     | 2      | 20    | 0     | 0     | 1     | 18    | 57    |

*AJHG, Volume 83*

| Site Populations | E3b   | G     | I     | J*(x)2 | J2    | K2    | L     | R1a   | R1b   | Total |
|------------------|-------|-------|-------|--------|-------|-------|-------|-------|-------|-------|
|                  | 0.158 | 0.105 | 0.018 | 0.035  | 0.351 | 0.000 | 0.000 | 0.018 | 0.316 | 1.000 |
| Italy NWA        | 2     | 6     | 0     | 1      | 8     | 0     | 0     | 3     | 24    | 46    |
|                  | 0.043 | 0.13  | 0.000 | 0.022  | 0.174 | 0.000 | 0.000 | 0.065 | 0.522 | 1.000 |
| Italy WCP        | 15    | 8     | 9     | 4      | 14    | 0     | 0     | 2     | 24    | 71    |
|                  | 0.211 | 0.113 | 0.127 | 0.056  | 0.197 | 0.000 | 0.000 | 0.028 | 0.338 | 1.000 |
| Italy CMA        | 3     | 4     | 5     | 3      | 21    | 0     | 0     | 1     | 22    | 59    |
|                  | 0.051 | 0.068 | 0.085 | 0.051  | 0.356 | 0.000 | 0.000 | 0.017 | 0.373 | 1.000 |
| Italy SLA*       | 3     | 6     | 4     | 0      | 13    | 0     | 0     | 2     | 19    | 51    |
|                  | 0.059 | 0.118 | 0.078 | 0.000  | 0.255 | 0.000 | 0.000 | 0.039 | 0.373 | 1.000 |
| Italy NEL*       | 14    | 7     | 3     | 0      | 8     | 0     | 0     | 1     | 21    | 55    |
|                  | 0.255 | 0.127 | 0.055 | 0.000  | 0.145 | 0.000 | 0.000 | 0.018 | 0.382 | 1.000 |
| Italy TLB*       | 9     | 12    | 4     | 0      | 15    | 0     | 0     | 4     | 32    | 79    |
|                  | 0.114 | 0.152 | 0.051 | 0.000  | 0.19  | 0.000 | 0.000 | 0.051 | 0.405 | 1.000 |
| Italy EBL*       | 7     | 10    | 19    | 0      | 8     | 0     | 0     | 1     | 50    | 95    |
|                  | 0.074 | 0.105 | 0.2   | 0.000  | 0.084 | 0.000 | 0.000 | 0.011 | 0.526 | 1.000 |
| S. Portugal      | 8     | 7     | 7     | 7      | 11    | 0     | 0     | 2     | 52    | 100   |
|                  | 0.08  | 0.07  | 0.07  | 0.07   | 0.11  | 0.000 | 0.000 | 0.02  | 0.52  | 1.000 |
| N. Portugal      | 21    | 5     | 7     | 1      | 7     | 0     | 0     | 0     | 53    | 101   |
|                  | 0.208 | 0.05  | 0.069 | 0.01   | 0.069 | 0.000 | 0.000 | 0.000 | 0.525 | 1.000 |
| S. Greece        | 20    | 3     | 11    | 1      | 9     | 1     | 0     | 1     | 9     | 46    |
|                  | 0.435 | 0.065 | 0.239 | 0.022  | 0.196 | 0.022 | 0.000 | 0.022 | 0.196 | 1.000 |
| N. Greece        | 34    | 5     | 12    | 8      | 16    | 2     | 1     | 18    | 14    | 96    |
|                  | 0.354 | 0.052 | 0.125 | 0.083  | 0.167 | 0.021 | 0.01  | 0.188 | 0.146 | 1.000 |
| S. Egypt         | 9     | 5     | 1     | 6      | 1     | 3     | 0     | 0     | 4     | 29    |
|                  | 0.31  | 0.172 | 0.034 | 0.207  | 0.034 | 0.103 | 0.000 | 0.000 | 0.138 | 1.000 |
| N. Egypt         | 23    | 3     | 0     | 4      | 4     | 1     | 0     | 1     | 4     | 43    |
|                  | 0.535 | 0.07  | 0.000 | 0.093  | 0.093 | 0.023 | 0.000 | 0.023 | 0.093 | 1.000 |



*AJHG, Volume 83*

| <b>STR+ Site</b>   | <b>PCS1+</b> | <b>PCS2+</b> | <b>PCS3+</b> | <b>PCS4+</b> | <b>PCS5+</b> | <b>PCS6+</b> | <b>PCS1+ –<br/>PCS3+</b> | <b>GCS1+</b> | <b>Total</b> |
|--------------------|--------------|--------------|--------------|--------------|--------------|--------------|--------------------------|--------------|--------------|
| <b>Populations</b> |              |              |              |              |              |              |                          |              |              |
| E. Sicily          | 0            | 0            | 0            | 0            | 0            | 0            | 0                        | 0            | 0            |
|                    | --           | --           | --           | --           | --           | --           | --                       | --           | --           |
| All Sicily         | 14           | 10           | 7            | 26           | 13           | 14           | 31                       | 30           | 431          |
|                    | 0.032        | 0.023        | 0.016        | 0.060        | 0.030        | 0.032        | 0.072                    | 0.070        | 1.000        |
| S. Italy           | 3            | 0            | 0            | 4            | 2            | 2            | 3                        | 5            | 69           |
|                    | 0.043        | 0.000        | 0.000        | 0.058        | 0.029        | 0.029        | 0.043                    | 0.072        | 1.000        |
| S. Italy &         | 3            | 0            | 0            | 4            | 2            | 2            | 3                        | 5            | 69           |
| W. Sicily          | 0.043        | 0.000        | 0.000        | 0.058        | 0.029        | 0.029        | 0.043                    | 0.072        | 1.000        |
| Italy WCL          | 5            | 0            | 0            | 6            | 4            | 6            | 5                        | 2            | 51           |
|                    | 0.098        | 0.000        | 0.000        | 0.118        | 0.078        | 0.118        | 0.098                    | 0.039        | 1.000        |
| Italy SAP          | 2            | 3            | 1            | 4            | 2            | 3            | 6                        | 6            | 67           |
|                    | 0.030        | 0.045        | 0.015        | 0.060        | 0.030        | 0.045        | 0.090                    | 0.090        | 1.000        |
| Italy              | 10           | 3            | 1            | 14           | 8            | 11           | 14                       | 13           | 187          |
|                    | 0.053        | 0.016        | 0.005        | 0.075        | 0.043        | 0.059        | 0.075                    | 0.070        | 1.000        |
| Sardinia           | 1            | 0            | 0            | 1            | 1            | 1            | 1                        | 0            | 3            |
|                    | 0.333        | 0.000        | 0.000        | 0.333        | 0.333        | 0.333        | 0.333                    | 0.000        | 1.000        |
| Minorca            | 0            | 0            | 0            | 0            | 0            | 0            | 0                        | 0            | 0            |
|                    | --           | --           | --           | --           | --           | --           | --                       | --           | --           |
| Majorca            | 0            | 0            | 0            | 0            | 0            | 0            | 0                        | 0            | 1            |
|                    | 0.000        | 0.000        | 0.000        | --           | --           | --           | 0.000                    | 0.000        | 1.000        |
| S. Spain –         | 4            | 1            | 1            | 2            | 2            | 0            | 6                        | 2            | 163          |
| Andalusia          | 0.025        | 0.006        | 0.006        | 0.012        | 0.012        | 0.000        | 0.037                    | 0.012        | 1.000        |
| Spain              | 7            | 2            | 0            | 9            | 6            | 5            | 9                        | 16           | 407          |
|                    | 0.017        | 0.005        | 0.000        |              |              |              | 0.022                    | 0.039        | 1.000        |
| Iberia             | 0            | 0            | 0            | 0            | 0            | 0            | 0                        | 0            | 20           |
|                    | 0.000        | 0.000        | 0.000        | 0.000        | 0.000        | 0.000        | 0.000                    | 0.000        | 1.000        |
| Portugal           | 5            | 6            | 1            | 7            | 4            | 3            | 12                       | 11           | 296          |
|                    | 0.017        | 0.020        | 0.003        | 0.024        | 0.014        | 0.010        | 0.041                    | 0.037        | 1.000        |
| Tot Iberia         | 16           | 8            | 1            | 18           | 12           | 8            | 25                       | 27           | 723          |

*AJHG, Volume 83*

| <b>STR+ Site</b>     | <b>PCS1+</b> | <b>PCS2+</b> | <b>PCS3+</b> | <b>PCS4+</b> | <b>PCS5+</b> | <b>PCS6+</b> | <b>PCS1+ –<br/>PCS3+</b> | <b>GCS1+</b> | <b>Total</b> |
|----------------------|--------------|--------------|--------------|--------------|--------------|--------------|--------------------------|--------------|--------------|
| <b>Populations</b>   | 0.017        | 0.011        | 0.001        | 0.025        | 0.017        | 0.011        | 0.035                    | 0.037        | 1.000        |
| Coastal<br>Tunisia   | 2            | 6            | 17           | 19           | 3            | 1            | 25                       | 15           | 185          |
|                      | 0.011        | 0.032        | 0.092        | 0.103        | 0.016        | 0.005        | 0.135                    | 0.081        | 1.000        |
| Inland Tunisia       | 0            | 0            | 0            | 25           | 0            | 0            | 0                        | 3            | 61           |
|                      | 0.000        | 0.000        | 0.000        | 0.410        | 0.000        | 0.000        | 0.000                    | 0.049        | 1.000        |
| Tunisia<br>(unsec'd) | 0            | 1            | 3            | 1            | 0            | 0            | 4                        | 1            | 55           |
|                      | 0.000        | 0.018        | 0.055        | 0.018        | 0.000        | 0.000        | 0.072                    | 0.018        | 1.000        |
| All Tunisia          | 2            | 7            | 20           | 45           | 3            | 1            | 29                       | 19           | 301          |
|                      | 0.007        | 0.023        | 0.066        | 0.150        | 0.010        | 0.003        | 0.096                    | 0.063        | 1.000        |
| Morocco              | 17           | 1            | 1            | 23           | 26           | 16           | 19                       | 7            | 250          |
|                      | 0.068        | 0.004        | 0.004        | 0.092        | 0.104        | 0.064        | 0.076                    | 0.028        | 1.000        |

**References**

1. Zalloua P.A., Xue Y., Khalife J., Makhoul N., Debiante L., Platt D.E., Royyuru A.K., Herrera R.J., Hernanz D.F., Blue-Smith J., et al. (2008). Y-chromosomal diversity in Lebanon is structured by recent historical events. *Am J Hum Genet* 82, 873-882.
2. Capelli C., Redhead N., Romano V., Cali F., Lefranc G., Delague V., Megarbane A., Felice A.E., Pascali V.L., Neophytou P.I., et al. (2006). Population structure in the Mediterranean basin: a Y chromosome perspective. *Ann Hum Genet* 70, 207-225.
3. Cinnioglu C., King R., Kivisild T., Kalfoglu E., Atasoy S., Cavalleri G.L., Lillie A.S., Roseman C.C., Lin A.A., Prince K., et al. (2004). Excavating Y-chromosome haplotype strata in Anatolia. *Hum Genet* 114, 127-148.
4. Martinez L., Underhill P.A., Zhivotovsky L.A., Gayden T., Moschonas N.K., Chow C.E., Conti S., Mamolini E., Cavalli-Sforza L.L., and Herrera R.J. (2007). Paleolithic Y-haplogroup heritage predominates in a Cretan highland plateau. *Eur J Hum Genet* 15, 485-493.
5. King R.J., Ozcan S.S., Carter T., Kalfoglu E., Atasoy S., Triantaphyllidis C., Kouvatsi A., Lin A.A., Chow C.E., Zhivotovsky L.A., et al. (2008). Differential Y-chromosome Anatolian influences on the Greek and Cretan Neolithic. *Ann Hum Genet* 72, 205-214.
6. Firasat S., Khaliq S., Mohyuddin A., Papaioannou M., Tyler-Smith C., Underhill P.A., and Ayub Q. (2007). Y-chromosomal evidence for a limited Greek contribution to the Pathan population of Pakistan. *Eur J Hum Genet* 15, 121-126.
7. Robino C., Varacalli S., Gino S., Chatzikyriakidou A., Kouvatsi A., Triantaphyllidis C., Di Gaetano C., Crobu F., Matullo G., Piazza A., et al. (2004). Y-chromosomal STR haplotypes in a population sample from continental Greece, and the islands of Crete and Chios. *Forensic Sci Int* 145, 61-64.
8. Semino O., Passarino G., Oefner P.J., Lin A.A., Arbuzova S., Beckman L.E., De Benedictis G., Francalacci P., Kouvatsi A., Limborska S., et al. (2000). The genetic legacy of Paleolithic

- Homo sapiens sapiens* in extant Europeans: a Y chromosome perspective. *Science* 290, 1155-1159.
9. Roewer L., Croucher P.J., Willuweit S., Lu T.T., Kayser M., Lessig R., de Knijff P., Jobling M.A., Tyler-Smith C., and Krawczak M. (2005). Signature of recent historical events in the European Y-chromosomal STR haplotype distribution. *Hum Genet* 116, 279-291.
  10. Ghiani M.E., Piras I.S., Mitchell R.J., and Vona G. (2004). Y-chromosome 10 locus short tandem repeat haplotypes in a population sample from Sicily Italy. *Leg Med* 6, 89-94.
  11. Capelli C., Brisighelli F., Scarnicci F., Arredi B., Caglia A., Vetrugno G., Tofanelli S., Onofri V., Tagliabracci A., Paoli G., et al. (2007). Y chromosome genetic variation in the Italian peninsula is clinal and supports an admixture model for the Mesolithic-Neolithic encounter. *Mol Phylogenet Evol* 44, 228-239.
  12. Francalacci P., Morelli L., Underhill P.A., Lillie A.S., Passarino G., Useli A., Madeddu R., Paoli G., Tofanelli S., Calo C.M., et al. (2003). Peopling of three Mediterranean islands (Corsica, Sardinia, and Sicily) inferred by Y-chromosome biallelic variability. *Am J Phys Anthropol* 121, 270-279.
  13. Ghiani M.E., and Vona G. (2002). Y-chromosome-specific microsatellite variation in a population sample from Sardinia (Italy). *Coll Antropol* 26, 387-401.
  14. Semino O., Magri C., Benuzzi G., Lin A.A., Al-Zahery N., Battaglia V., Maccioni L., Triantaphyllidis C., Shen P., Oefner P.J., et al. (2004). Origin, diffusion, and differentiation of Y-chromosome haplogroups E and J: inferences on the Neolithization of Europe and later migratory events in the Mediterranean area. *Am J Hum Genet* 74, 1023-1034.
  15. Contu D., Morelli L., Santoni F., Foster J.W., Francalacci P., and Cucca F. (2008). Y-chromosome based evidence for pre-Neolithic origin of the genetically homogeneous but diverse Sardinian population: inference for association scans. *PLoS ONE* 3, e1430.

16. Martin P., Garcia-Hirschfeld J., Garcia O., Gusmao L., Garcia P., Albarran C., Sancho M., and Alonso A. (2004). A Spanish population study of 17 Y-chromosome STR loci. *Forensic Sci Int* 139, 231-235.
17. Jimenez G., Picornell A., Tomas C., Castro J.A., and Ramon M.M. (2001). Y-chromosome polymorphism data in Majorcan, Minorcan and Valencian populations (eastern Spain). *Forensic Sci Int* 124, 231-234.
18. Quintana-Murci L., Veitia R., Fellous M., Semino O., and Poloni E.S. (2003). Genetic structure of Mediterranean populations revealed by Y-chromosome haplotype analysis. *Am J Phys Anthropol* 121, 157-171.
19. Flores C., Maca-Meyer N., Gonzalez A.M., Oefner P.J., Shen P., Perez J.A., Rojas A., Larruga J.M., and Underhill P.A. (2004). Reduced genetic structure of the Iberian peninsula revealed by Y-chromosome analysis: implications for population demography. *Eur J Hum Genet* 12, 855-863.
20. Gonzalez-Neira A., Gusmao L., Brion M., Lareu M.V., Amorim A., and Carracedo A. (2000). Distribution of Y-chromosome STR defined haplotypes in Iberia. *Forensic Sci Int* 110, 117-126.
21. Marjanovic D., Fornarino S., Montagna S., Primorac D., Hadziselimovic R., Vidovic S., Pojskic N., Battaglia V., Achilli A., Drobic K., et al. (2005). The peopling of modern Bosnia-Herzegovina: Y-chromosome haplogroups in the three main ethnic groups. *Ann Hum Genet* 69, 757-763.
22. Cherni L., Pereira L., Goios A., Loueslati B.Y., Khodjet el Khil H., Gomes I., Gusmao L., Alves C., Slama A., Amorim A., et al. (2005). Y-chromosomal STR haplotypes in three ethnic groups and one cosmopolitan population from Tunisia. *Forensic Sci Int* 152, 95-99.



23. Arredi B., Poloni E.S., Paracchini S., Zerjal T., Fathallah D.M., Makrelouf M., Pascali V.L., Novelletto A., and Tyler-Smith C. (2004). A predominantly Neolithic origin for Y-chromosomal DNA variation in North Africa. *Am J Hum Genet* 75, 338-345.
